# Supplementary material for: Regional Variation in Hemoglobin Distribution Among Individuals With CKD: the ISN International Network of CKD Cohorts
Source: PubMed Central journal article supplement — Kidney Int Rep. 2023 Aug 12;8(10):2056–67. doi: 10.1016/j.ekir.2023.07.032 (PMC10577366; doi:10.1016/j.ekir.2023.07.032), 2023-08-12
Supplement: mmc1.pdf [file mmc1.pdf]

## Supplementary Material

| <b>Item</b> | <b>Description</b>                                                                                                                                                          |
|-------------|-----------------------------------------------------------------------------------------------------------------------------------------------------------------------------|
| Table S1    | Description of iNET-CKD cohorts                                                                                                                                             |
| Table S2    | Variable definitions                                                                                                                                                        |
| Table S3    | Hemoglobin distribution (mean and standard deviation) in each cohort, overall and within strata of sex and eGFR categories                                                  |
| Table S4    | Supplementary Table 4. Cohort-specific levels of iron saturation (mean and standard deviation)                                                                              |
| Table S5    | Cohort-specific and pooled estimates for the interaction between eGFR and sex. Estimates represent the change in the slope of the relationship between eGFR and hemoglobin. |
| Table S6    | Cohort-specific and pooled estimates for the mean difference in hemoglobin in women compared to men at different levels of eGFR                                             |
| Table S7    | Cohort-specific and pooled estimates for the mean difference in hemoglobin per 10 mL/min per 1.73m <sup>2</sup> increase in eGFR                                            |
| Table S8    | Cohort-specific and pooled estimates for the mean difference in hemoglobin according to etiology of CKD                                                                     |
| Table S9    | Cohort-specific and pooled estimates for the independent association between covariates and hemoglobin from the extended multivariable model                                |
| Table S10   | R-squared values for linear regression models applied in participating cohorts                                                                                              |
| Table S11   | Cohort-specific and pooled estimates for the independent association between smoking status and hemoglobin                                                                  |
| Table S12   | Cohort-specific and pooled estimates for the independent association between altitude and hemoglobin                                                                        |
| Table S13   | Cohort-specific and pooled estimates for the independent association between use of RAAS inhibitor and hemoglobin                                                           |
| Table S14   | Cohort-specific and pooled estimates for the mean difference in hemoglobin in women compared to men at different levels of eGFR in ESA-unexposed subgroup                   |
| Table S15   | Cohort-specific and pooled estimates for the mean difference in hemoglobin according to etiology of CKD in ESA-unexposed subgroup                                           |
| Table S16   | Cohort-specific and pooled estimates for the independent association between covariates and hemoglobin from the extended multivariable model in ESA-unexposed subgroup      |
| Table S17   | Complete case analysis including 10 cohorts who provided individual-level data                                                                                              |
| Figure S1   | Summary of data collection from participating iNET-CKD cohorts for pooled analysis.                                                                                         |
| Figure S2   | Mean (standard deviation) hemoglobin values in women (red circles) and men (blue circles) within categories of eGFR for each cohort and grouped by continent                |
| Appendix 1  | Funding Acknowledgment for iNET-CKD cohorts                                                                                                                                 |
| Appendix 2  | STROBE Statement                                                                                                                                                            |

Table S1. Description of iNET-CKD cohorts.

| Acronyms    | Full study name                                                                           | Country/Countries                                                                                                  | Age range (years) | Year of enrollment | Target population                                                                                  |
|-------------|-------------------------------------------------------------------------------------------|--------------------------------------------------------------------------------------------------------------------|-------------------|--------------------|----------------------------------------------------------------------------------------------------|
| 4C          | The Cardiovascular Comorbidity in Children with Chronic Kidney Disease study              | Germany, Italy, France, United Kingdom, Poland, Portugal, Lithuania, Serbia, Czechia, Austria, Switzerland, Turkey | 6-17              | 2009-2011          | Non-dialysis early to advanced CKD in children and adolescents under nephrology care               |
| CKDBIS      | The Berlin Initiative Study                                                               | Germany                                                                                                            | 70-100            | 2009-2011          | Non-dialysis early to advanced CKD in older adults                                                 |
| CanPREDDICT | Canadian study of prediction of death, dialysis and interim cardiovascular events         | Canada                                                                                                             | 18+               | 2008-2009          | Non-dialysis advanced CKD in adults under nephrology care                                          |
| CKD.QLD     | Chronic kidney disease registry in Queensland, Australia                                  | Australia                                                                                                          | 18-99             | 2011               | Non-dialysis early to advanced CKD in adults                                                       |
| CKD-JAC     | Chronic Kidney Disease Japan Cohort Study                                                 | Japan                                                                                                              | 20-75             | 2007-2008          | Non-dialysis early to advanced CKD in adults                                                       |
| CKDOPPS     | CKD Outcomes and Practice Patterns Study                                                  | United States, Brazil, Germany                                                                                     | 18+               | 2014-present       | Non-dialysis advanced CKD in adults under nephrology care                                          |
| CKD-REIN    | The French Chronic Kidney Disease-Renal Epidemiology and Information Network cohort study | France                                                                                                             | 19-94             | 2013-2016          | Non-dialysis advanced CKD in adults under nephrology care                                          |
| CKiD        | Chronic Kidney Disease in Children prospective cohort study                               | United States, Canada                                                                                              | 2-20              | 2005-2019          | Non-dialysis early to advanced CKD in children, adolescents and young adults under nephrology care |

| <b>Acronyms</b>                | <b>Full study name</b>                                                                                                    | <b>Country/Countries</b>                                    | <b>Age range (years)</b> | <b>Year of enrollment</b>             | <b>Target population</b>                                                                           |
|--------------------------------|---------------------------------------------------------------------------------------------------------------------------|-------------------------------------------------------------|--------------------------|---------------------------------------|----------------------------------------------------------------------------------------------------|
| CORE-CKD                       | Cohort of CKD patients with high risk for cardiovascular events or renal disease progression multicenter study (Thailand) | Thailand                                                    | 20-75                    | 2015-2017                             | Non-dialysis early to advanced CKD in adults                                                       |
| CRIC                           | The Chronic Renal Insufficiency Cohort Study                                                                              | USA                                                         | 21-79                    | 2003-2008;<br>2013-2015;<br>2018-2019 | Non-dialysis early to advanced CKD in adults                                                       |
| C-STRIDE                       | Chinese cohort study of chronic kidney disease                                                                            | China                                                       | 18-74                    | 2011-2017                             | Non-dialysis early to advanced CKD in adults under nephrology care                                 |
| EQUAL                          | European quality study on treatment in advanced CKD                                                                       | Netherlands, Germany, Italy, Sweden, United Kingdom, Poland | 65+                      | 2012-2020                             | Non-dialysis stage 4 CKD in older adults                                                           |
| GCKD                           | German Chronic Kidney Disease Study                                                                                       | Germany                                                     | 18-17                    | 2010-2012                             | Non-dialysis early CKD in adults under nephrology care                                             |
| H3AKDN<br>EnuguH3AKDN<br>Enugu | Human Heredity and Health in Africa Kidney Disease Research Network                                                       | Nigeria                                                     | 17-80                    | 2004-2021                             | Non-dialysis early to advanced CKD in children and adults                                          |
| iCKD                           | Indian chronic kidney disease study                                                                                       | India                                                       | 18-75                    | 2015-2020                             | Non-dialysis early to advanced CKD in adults                                                       |
| KNOW Ped<br>CKD                | KoreaN cohort study for outcomes in patients with pediatric CKD                                                           | Korea                                                       | 0-20                     | 2011-2016;<br>2019-present            | Non-dialysis early to advanced CKD in children, adolescents and young adults under nephrology care |
| KNOW-CKD                       | KoreaN cohort study for Outcome in patients With Chronic Kidney Disease                                                   | Korean                                                      | 19-75                    | 2011-2016                             | Non-dialysis early and advanced CKD in adults under nephrology care                                |
| NRHP-URU                       | National Renal Healthcare Program, Uruguay                                                                                | Uruguay                                                     | 15-99                    | 2004-2021                             | Non-dialysis early CKD in adolescents and adults under nephrology care                             |

| <b>Acronyms</b> | <b>Full study name</b>                                                                                | <b>Country/Countries</b>                        | <b>Age range (years)</b> | <b>Year of enrollment</b> | <b>Target population</b>                                           |
|-----------------|-------------------------------------------------------------------------------------------------------|-------------------------------------------------|--------------------------|---------------------------|--------------------------------------------------------------------|
| PROVALID        | Prospective Cohort Study in Patients with Type 2 Diabetes Mellitus for Validation of Biomarkers Study | Austria, Hungary, Netherlands, Poland, Scotland | 18-75                    | 2011-2016                 | Adults with type 2 diabetes in primary care                        |
| PSI BIND-NL     | Parelsnoer Initiative Biobank of Nephrological Diseases in the Netherlands                            | Netherlands                                     | 18-90                    | 2010-2015                 | Non-dialysis early to advanced CKD in adults under nephrology care |
| RIISC           | The Renal Impairment in Secondary Care Study                                                          | United Kingdom                                  | 19-92                    | 2010-2015                 | Non-dialysis advanced CKD in adults under nephrology care          |
| RRID            | Renal Risk in Derby                                                                                   | United Kingdom (England only)                   | 32-94                    | 2008-2010                 | Non-dialysis early CKD in adults under primary care                |

Table S2a. Variable definitions.

| Variable                                      | Definition                                                                                                                                                                                                                                                                                                                                                                                                                                                                                        | Coding for Analysis               | Technical Notes                                                                                                                                                                                                                                                                               |
|-----------------------------------------------|---------------------------------------------------------------------------------------------------------------------------------------------------------------------------------------------------------------------------------------------------------------------------------------------------------------------------------------------------------------------------------------------------------------------------------------------------------------------------------------------------|-----------------------------------|-----------------------------------------------------------------------------------------------------------------------------------------------------------------------------------------------------------------------------------------------------------------------------------------------|
| Hemoglobin (Hg, in g/L)                       | First available measurement of hemoglobin.                                                                                                                                                                                                                                                                                                                                                                                                                                                        | Continuous                        | C-STRIDE: Cohort included extreme values. Excluding values <40 g/L and >200 g/L resulted in only 10 exclusions.                                                                                                                                                                               |
| Year                                          | Year when hemoglobin measurement performed.                                                                                                                                                                                                                                                                                                                                                                                                                                                       | Continuous                        | KNOW-CKD: provided the date of consent and this is used as the year.                                                                                                                                                                                                                          |
| Age                                           | Age derived by subtracting the date of birth from the date of hemoglobin measurement (divided by 365.25) rounded down to the nearest integer.<br><br>SAS function: <i>Floor ((Date of Hg measurement – DOB)/365.25)</i>                                                                                                                                                                                                                                                                           | Continuous                        | NRHP: provided data from Age 1-99. Removed 142 participants with age<18 from the adult cohort.<br><br>CKDBIS: Cohort consist of older participants with age>65<br><br>H3AKDN Enugu: Cohort consist of 5 participants with age 15-18. Excluded the 5 participants from adult cohort.           |
| Sex                                           | Self-defined biological sex at birth: male or female                                                                                                                                                                                                                                                                                                                                                                                                                                              | Categorical                       |                                                                                                                                                                                                                                                                                               |
| Estimated glomerular filtration rate (eGFR)   | eGFR value calculated from CKD-EPI formula: $GFR = 141 * \min(Scr/k, 1)^\alpha * \max(Scr/k, 1)^{-1.209} * 0.993 * Age * 1.018 [if female] * 1.159 [if black]$ . <i>Scr</i> is serum creatinine “standardized” to isotope dilution mass spectrometry (mg/dL), $k$ is 0.7 for females and 0.9 for males, $\alpha$ is -0.329 for females and -0.411 for males, min indicates the minimum of <i>Scr/k</i> or 1, and max indicates the maximum of <i>Scr/k</i> or 1, at Hg measurement (+/- 3 months) | Continuous                        | RRID: eGFR was calculated using original CKD-EPI equation without the ethnicity factor (only 4 participants identified as African-Caribbean).                                                                                                                                                 |
| Erythropoietin stimulating agent status (ESA) | indicating whether patient was receiving any ESA therapy at time of Hg measurement (+/- 3 months). Common generic drug names are as follows: Epoetin alfa/beta, Epoetin kappa, Darbepoetin alfa, Epoetin beta pegol. See ATC codes below.                                                                                                                                                                                                                                                         | 0 = no<br>1 = yes<br>99 = unknown | RRID: Given that this is a primary care cohort restricted to CKD stage 3, it was assumed that no participants were receiving ESA.<br><br>C-STRIDE: Cohort only registered the case of using ESA (1=yes), and 0 may contain both “not using” and “unknown” cases. Assumed ESA unknown as “no”. |

| Variable                            | Definition                                                                                                                                                                                                                                                                                                                                               | Coding for Analysis                                                                       | Technical Notes                                                                                                                                                                                                                                                                                                                                                                              |
|-------------------------------------|----------------------------------------------------------------------------------------------------------------------------------------------------------------------------------------------------------------------------------------------------------------------------------------------------------------------------------------------------------|-------------------------------------------------------------------------------------------|----------------------------------------------------------------------------------------------------------------------------------------------------------------------------------------------------------------------------------------------------------------------------------------------------------------------------------------------------------------------------------------------|
| Country                             | Country of where participant was enrolled.                                                                                                                                                                                                                                                                                                               |                                                                                           | <p>PROVALID: Cohort consist of data from 5 countries: Austria, Hungary, Netherlands, Poland and Scotland. Due to small sample size for each country, we considered the whole cohort as one.</p> <p>EQUAL: Cohort consist of data from 6 countries: Poland, Germany, Netherlands, Italy, UK and Sweden. Due to small sample size for each country, we considered the whole cohort as one.</p> |
| Atheromatous cardiovascular disease | Self-reported or physician-diagnosed history of atheromatous cardiovascular disease: any one of coronary artery disease, prior revascularization, stroke or peripheral vascular disease at or prior to Hg measurement. See below for ICD codes.                                                                                                          | <p>0 = No</p> <p>1 = Yes</p> <p>99 = unknown</p>                                          |                                                                                                                                                                                                                                                                                                                                                                                              |
| Congestive heart failure            | Self-reported or physician-diagnosed history of congestive heart failure at or prior to Hg measurement. See below for ICD codes.                                                                                                                                                                                                                         | <p>0 = No</p> <p>1 = Yes</p> <p>99 = unknown</p>                                          | RIISC: data not available.                                                                                                                                                                                                                                                                                                                                                                   |
| Diabetes mellitus (DM)              | History of diabetes including: serum fasting glucose $\geq 7.0$ mmol/L ( $\geq 126$ mg/dL), non-fasting glucose $\geq 11.1$ mmol/L ( $\geq 200$ mg/dL), glycated hemoglobin A1c $\geq 6.5\%$ , and/or use of glucose lowering drugs. Self-report or physician diagnosed diabetes can be included at or prior to Hg measurement. See below for ICD codes. | <p>0 = No diabetes</p> <p>1 = Diabetes</p> <p>99 = unknown</p>                            | <p>KNOW-CKD: 4 patients with DM="Suspected" were removed from the cohort.</p> <p>PROVALID: Exclusively included participants with DM.</p>                                                                                                                                                                                                                                                    |
| KDIGO albuminuria categories        | <p>Urinary albumin (mg) / Urinary creatinine (g) at Hg measurement (+/- 3 months).</p> <p><b>Normal</b><br/>ACR &lt;30 mg/g or AER &lt;30 mg/24h or PCR &lt;150 mg/g or PER &lt;150 mg/24h or Dipstick negative to trace</p> <p><b>Mild</b><br/>30<math>\leq</math> ACR &lt;300 mg/g or 30<math>\leq</math> AER</p>                                      | <p>0 = normal</p> <p>1 = mild increase</p> <p>2 = severe increase</p> <p>99 = unknown</p> | <p>C-STRIDE: Only the urinary albumin to creatinine ratio (uACR) variable available.</p> <p>PSI BIND-NL: ACR data not available.</p>                                                                                                                                                                                                                                                         |

| Variable                                                      | Definition                                                                                                                                                                                                                                                                                                | Coding for Analysis                                                                                                                               | Technical Notes                                                                                                                                                                                                                                                                                                                                                                                                      |
|---------------------------------------------------------------|-----------------------------------------------------------------------------------------------------------------------------------------------------------------------------------------------------------------------------------------------------------------------------------------------------------|---------------------------------------------------------------------------------------------------------------------------------------------------|----------------------------------------------------------------------------------------------------------------------------------------------------------------------------------------------------------------------------------------------------------------------------------------------------------------------------------------------------------------------------------------------------------------------|
|                                                               | <p>&lt;300 mg/24h or 150≤ PCR &lt;500 mg/g or 150≤ PER&lt;500 mg/24h or Dipstick trace to 1+<br/> <b>Severe</b><br/> ACR ≥ 300 mg/g or AER ≥ 300 mg/24h or PCR ≥ 500 mg/g or PER ≥ 500 mg/24h or Dipstick 1+ or greater</p>                                                                               |                                                                                                                                                   |                                                                                                                                                                                                                                                                                                                                                                                                                      |
| Primary Cause of Kidney Disease                               | Underlying cause of kidney disease, biopsy-proven or physician diagnosed in the absence of a kidney biopsy                                                                                                                                                                                                | <p>1 = Diabetic kidney disease<br/> 2 = Hypertension<br/> 3 = Glomerulonephritis<br/> 4 = Polycystic kidney disease<br/> 5 = other or unknown</p> | <p>CKDBIS: data not available.<br/> RRID: data not available. As this is a primary care cohort, most participants would never have seen a nephrologist. Hence only those with diabetes have a specific diagnosis.<br/> PROVALID: data not available.<br/> CRIC: GN and PKD categories not available.<br/> C-STRIDE: HTN, PKD categories not available.<br/> CKD-JAC: Cohort did not enroll participants with PKD</p> |
| Body Mass Index                                               | Calculated as weight (kg) / Height (m) <sup>2</sup> . Use weight closest to Hg measurement. For pediatrics only, use height closest to Hg measurement                                                                                                                                                     | <p>1 = &lt; 18.5<br/> 2 = 18.5-24.9<br/> 3 = 25.0-29.9<br/> 4 = ≥ 30<br/> 99 = unknown</p>                                                        |                                                                                                                                                                                                                                                                                                                                                                                                                      |
| Use of Renin-angiotensin-aldosterone system (RAAS) inhibitors | Whether participant was receiving RAAS inhibitors at time of Hg measurement (+/-3 months). Common generic drug names are as follows: Candesartan, Eprosartan, Irbesartan, Losartan, Olmesartan, Telmisartan, Valsartan, Benazepril, Captopril, Enalapril, Fosinopril, Lisinopril, Perindopril, Quinapril, | <p>0 = no<br/> 1 = yes<br/> 99 = unknown</p>                                                                                                      | <p>CKD.QLD: unable to isolate time point at hemoglobin measure. Participants ever on RAAS were considered as 'yes'.<br/> C_STRIDE: Cohort only registered the case of using RAAS (1=yes). The value of 0 may contain both 'not using' and "unknown" cases.</p>                                                                                                                                                       |

| Variable          | Definition                                                                                                                                             | Coding for Analysis                                                         | Technical Notes                                                                                                                                                                                                                                                                                                                                                |
|-------------------|--------------------------------------------------------------------------------------------------------------------------------------------------------|-----------------------------------------------------------------------------|----------------------------------------------------------------------------------------------------------------------------------------------------------------------------------------------------------------------------------------------------------------------------------------------------------------------------------------------------------------|
|                   | Ramipril and Trandolapril. See below for ATC codes.                                                                                                    |                                                                             |                                                                                                                                                                                                                                                                                                                                                                |
| Smoking Status    | Self-reported history of smoking at time of Hg measurement.                                                                                            | 0 = Never smoked<br>1 = Current smoker<br>2 = Former smoker<br>99 = unknown | CKDopps: data not available.<br>ICKD: Cohort captured both smoking and smokeless tobacco use.<br>CRIC: Only have "current smoker" and "Not current smoke" categories. Categorized 'Not current smoke' as "Never smoked".<br>C-STRIDE: Cohort combined current and former smoking together; the value of 1 may include current smoker and former smokers alike. |
| City              | City of the participant's resident or if unavailable, City of the center for study enrollment.                                                         |                                                                             | CKDopps: data not available.<br>PROVALID: Data not collected during the study.<br>CKDopps: Data not collected during the study.<br>EQUAL: Data not collected during the study.<br>PSI BIND-NL: Data not collected during the study.                                                                                                                            |
| State or Province | State or Province of the participant's resident or if unavailable, State or Province of the center for enrollment. Altitude will be derived from this. |                                                                             | PROVALID: Data not collected during the study.<br>CKDopps: Data not collected during the study.<br>EQUAL: Data not collected during the study.<br>PSI BIND-NL: Data not collected during the study.                                                                                                                                                            |
| Altitude          | Based on location of residence or, if unavailable, location of the center for study enrollment.                                                        | 1 = <500m<br>2 = 500-1000m<br>3 = >1000m                                    | NRHP: Altitude for the whole country is <50 m<br>CKDBIS: Only city is Berlin with altitude 39m<br>RRID: Only city is Derby with altitude 62m<br>H3AKDN Enugu: Only city is Ituku with altitude                                                                                                                                                                 |



| Variable                           | Definition                                                                                         | Coding for Analysis | Technical Notes                                                                           | Other |
|------------------------------------|----------------------------------------------------------------------------------------------------|---------------------|-------------------------------------------------------------------------------------------|-------|
| Iron saturation (%)                | Transferrin saturation (TSAT) measurement at time of Hg measurement (+/-3 months)                  | Continuous          | 200m<br>Data available only for C-STIDE, ICKD, KNOW-CKD, CKD-JAC, CKDopps, NRHP, CKD-REIN |       |
| Ferritin (µg/l)                    | Serum ferritin measurement at time of Hg measurement (+/- 3 months)                                | Continuous          | Data available only for C-STIDE, ICKD, KNOW-CKD, CKD-JAC, CKDopps, NRHP, CKD-REIN, RIISC  |       |
| Hemoglobin value at ESA initiation | Measurement of hemoglobin (g/L) at time of ESA initiation (up to 1 month prior to ESA initiation). | Continuous          | Data available only for CKDopps, NRHP                                                     |       |

Table S2b. Anatomical Therapeutic Chemical (ATC) codes.

| Drug            | ATC codes                                                                                                                                                                                                                                                                                                                                                                                                                                                        |
|-----------------|------------------------------------------------------------------------------------------------------------------------------------------------------------------------------------------------------------------------------------------------------------------------------------------------------------------------------------------------------------------------------------------------------------------------------------------------------------------|
| ESA             | B03XA01 - B03XA02 - B03XA03                                                                                                                                                                                                                                                                                                                                                                                                                                      |
| RAAS inhibitors | C09AA01 - C09AA02 - C09AA03 - C09AA04 - C09AA05 - C09AA06 - C09AA07 - C09AA08 - C09AA09 - C09AA10 - C09AA15 - C09BB02 - C09BB04 - C09BB10 - C09BA01 - C09BA02 - C09BA03 - C09BA04 - C09BA05 - C09BA06 - C09BA07 - C09BA09 - C09BA15<br>C09CA01 - C09CA02 - C09CA03 - C09CA04 - C09CA06 - C09CA07 - C09CA08 - C09DA01 - C09DA03 - C09DA04 - C09DA06 - C09DA07 - C09DA08 - C09DB01 - C09DB02 - C09DB04 - C09DX01<br>C09XA02 - C09XA52<br>C03DA01, C03DA04, C03EA04 |

Table S2c. International Classification of Disease codes

| Comorbidity                                | ICD-9^                                                                                                                                                    | ICD-10-AM or CA^                                                                                                                                               |
|--------------------------------------------|-----------------------------------------------------------------------------------------------------------------------------------------------------------|----------------------------------------------------------------------------------------------------------------------------------------------------------------|
| <b>Diabetes</b>                            | 250.x                                                                                                                                                     | E10.0, E10.1, E10.9, E11.0, E11.1, E11.9, E12.0, E12.1, E12.9, E13.0, E13.1, E13.9, E14.0, E14.1, E14.9                                                        |
| <b>Atheromatous cardiovascular disease</b> | 410.x, 412.x<br>430.x, 431.x, 433.x, 434.x, 435x<br>440.x, 441.x, 444.x, 445.x<br>415.1, 451.1, 451.2, 451.81, 451.83, 451.89, 451.9, 453.2, 453.8, 453.9 | I21.x, I22.x, I25.2<br>I60 - I61, I63 - I64, G45<br>I70.x - I71.x, I74.x<br>I80.2, I80.3, I80.1, I82.8, I80.9, I82.9, I80.8, O22.3, O22.9, O87.1, I26.9, I26.0 |
| <b>Congestive heart failure</b>            | 428.x, 398.91, 402.01, 402.11, 402.91, 404.01, 404.03, 404.11, 404.13, 404.91, 404.93, 425.4-425.9, 428.x                                                 | I09.9, I11.0, I13.0, I13.2, I25.5, I42.0, I42.5-I42.9, I43.x, I50.x, P29.0                                                                                     |

Table S3. Hemoglobin distribution (mean and standard deviation) in each cohort, overall and within strata of sex and eGFR categories.

| Variable      |                | Asia          |               |               |               |               | Australia     | North America |               |               | South America |               |
|---------------|----------------|---------------|---------------|---------------|---------------|---------------|---------------|---------------|---------------|---------------|---------------|---------------|
|               |                | CORE-CKD      | C-STRIDE      | ICKD          | KNOW-CKD      | CKD-JAC       | CKD.QLD       | CanPREDDICT   | CRIC          | CKDopps       | CKDopps       | NRHP          |
|               |                | Thailand      | China         | India         | Korea         | Japan         | Australia     | Canada        | United States | United States | Brazil        | Uruguay       |
| Overall       |                | 125.7 (±24.3) | 122.2 (±21.4) | 118 (±19.1)   | 122.1 (±19.2) | 119.5 (±18)   | 123.2 (±20)   | 123.2 (±15.6) | 125.1 (±17.6) | 118 (±18.8)   | 121 (±19.1)   | 126.5 (±19)   |
| Sex           | Male           | 131.5 (±25.7) | 129.1 (±21.8) | 122.4 (±19.5) | 127.5 (±19.9) | 123.3 (±18.7) | 126.1 (±21.3) | 125.8 (±16)   | 130.1 (±17.9) | 122.3 (±20.2) | 125.9 (±20.6) | 130.9 (±19.7) |
|               | Female         | 114.8 (±16.8) | 112.8 (±16.9) | 109.4 (±14.8) | 113.4 (±14.2) | 112.7 (±14.5) | 119.7 (±17.9) | 118.8 (±14)   | 118.8 (±14.9) | 113.4 (±15.9) | 115.6 (±15.6) | 120.5 (±16.2) |
| eGFR Category | < 20           | 108.5 (±15.9) | 107.5 (±18.1) | 103.2 (±15.5) | 108.3 (±13.8) | 107.5 (±13.7) | 110.4 (±18.9) | 117.2 (±14.4) | 111.2 (±15.7) | 110.5 (±17.2) | 111.1 (±16.6) | 112.2 (±17.9) |
|               | 20-30          | 116.8 (±18.4) | 117.3 (±18.8) | 110.1 (±16)   | 116.3 (±15.6) | 114.3 (±15.6) | 120.5 (±18.7) | 122.8 (±14.7) | 118.5 (±16.4) | 117.2 (±17.3) | 121.1 (±16.5) | 120.5 (±17.9) |
|               | 30-45          | 127.1 (±25.1) | 126.3 (±20.8) | 117.2 (±18.8) | 125.9 (±17.9) | 123.1 (±16.8) | 127.2 (±18.3) | 126.5 (±15.9) | 123.4 (±17)   | 125.5 (±19)   | 130.5 (±18.8) | 127.8 (±17.7) |
|               | 45-60          | 134.3 (±25)   | 132.9 (±19.6) | 122.9 (±19.3) | 133.7 (±18.9) | 129.8 (±17.1) | 133.1 (±18)   | 133 (±18.7)   | 129.4 (±17.2) | 128.6 (±17.7) | 133.8 (±17.8) | 134.6 (±17.7) |
| GFR & Sex     | <20 & Male     | 112.2 (±15.4) | 111.9 (±19.7) | 107.9 (±18.3) | 110.7 (±14.9) | 109.6 (±13.6) | 111.3 (±18.7) | 119.3 (±14.8) | 112.9 (±16)   | 113.8 (±18.6) | 113.5 (±17.9) | 114.4 (±18.9) |
|               | <20 & Female   | 103 (±15.2)   | 103.6 (±15.5) | 101.6 (±14.7) | 105.6 (±12)   | 104.2 (±13.4) | 109.2 (±19.2) | 114.1 (±13.2) | 109.2 (±15.2) | 107.2 (±14.9) | 108.6 (±14.6) | 110 (±16.4)   |
|               | 20-30 & Male   | 122.7 (±18.9) | 123.4 (±19.8) | 118.1 (±16.9) | 119.8 (±16.5) | 117.4 (±16.3) | 122.9 (±19.7) | 125.3 (±15.1) | 123.4 (±16.7) | 121.6 (±18.7) | 126 (±16.8)   | 123.4 (±19.6) |
|               | 20-30 & Female | 110.1 (±15.3) | 110.1 (±14.8) | 105.4 (±13.4) | 110.4 (±11.7) | 109.3 (±12.9) | 117.7 (±17.1) | 119 (±13.2)   | 113.3 (±14.5) | 112.8 (±14.6) | 116.4 (±14.8) | 117.7 (±15.5) |
|               | 30-45 & Male   | 132.6 (±27)   | 132.9 (±20.9) | 120.7 (±19.5) | 131.2 (±18)   | 127.5 (±16.9) | 130.8 (±20)   | 129.1 (±16)   | 128.2 (±17.6) | 130.2 (±20.1) | 136.9 (±19.7) | 131.9 (±18.4) |
|               | 30-45 & Female | 116.5 (±16.7) | 116.9 (±16.7) | 110.2 (±15.1) | 116.8 (±13.5) | 114.7 (±13.2) | 123.1 (±15.2) | 121.7 (±14.4) | 117.9 (±14.5) | 119.9 (±15.9) | 122.2 (±13.5) | 122.5 (±15.3) |
|               | 45-60 & Male   | 137.8 (±26.2) | 139 (±18.6)   | 125.9 (±19.4) | 139.9 (±17.4) | 134.7 (±17.3) | 137.2 (±18.4) | 135.5 (±18.7) | 134.2 (±17.3) | 131 (±19.7)   | 139.9 (±16.5) | 138 (±17.6)   |
|               | 45-60 & Female | 122.8 (±15.6) | 120.8 (±15.7) | 112 (±14.4)   | 120.7 (±14.6) | 121.3 (±13)   | 127.7 (±16.1) | 125.4 (±17.1) | 122.4 (±14.5) | 125 (±13.4)   | 125 (±16.2)   | 126.3 (±15)   |

| Variable         |                | Africa           |                    | Europe        |                   |                   |                 |                    |                 |                      |                            |
|------------------|----------------|------------------|--------------------|---------------|-------------------|-------------------|-----------------|--------------------|-----------------|----------------------|----------------------------|
|                  |                | H3AKDN           | CKD-REIN<br>France | RIISC<br>UK   | CKDBIS<br>Germany | EQUAL<br>Various* | GCKD<br>Germany | CKDopps<br>Germany | RRID<br>England | PROVALID<br>Various* | PSI BIND-NL<br>Netherlands |
|                  |                | Enugu<br>Nigeria |                    |               |                   |                   |                 |                    |                 |                      |                            |
| Overall          |                | 94.8 (±22.7)     | 129.9 (±16.5)      | 122.7 (±17)   | 131.6 (±14.1)     | 116 (±15.1)       | 134.9 (±16.9)   | 123.3 (±16.8)      | 130.7 (±14.5)   | 131 (±16.3)          | 129.4 (±17.9)              |
| Sex              | Male           | 95.1 (±24.5)     | 133.2 (±16.8)      | 125.9 (±18.1) | 133.5 (±15.7)     | 116.9 (±15.5)     | 138.8 (±17.5)   | 125.8 (±18.1)      | 135.3 (±15.1)   | 134.4 (±17.1)        | 132.6 (±18.3)              |
|                  | Female         | 94.4 (±20.5)     | 123.5 (±13.8)      | 117.1 (±13.2) | 130 (±12.2)       | 114.3 (±14.1)     | 128.6 (±13.8)   | 120 (±14.3)        | 126.8 (±12.6)   | 128.5 (±15.3)        | 122.7 (±14.9)              |
| eGFR<br>Category | < 20           | 82.3 (±19.2)     | 121.4 (±14.6)      | 115.8 (±16.5) | 117.1 (±12.5)     | 114.9 (±14.8)     | 124.2 (±16.8)   | 117 (±15.5)        |                 | 112.2 (±12.7)        | 118.1 (±14.3)              |
|                  | 20-30          | 100.7 (±18.1)    | 126.7 (±15.7)      | 121.7 (±16.5) | 126.8 (±14.4)     | 119.3 (±15.9)     | 128.1 (±16)     | 123.3 (±16)        | 119 (±15.6)     | 121.2 (±15.8)        | 126.3 (±16.9)              |
|                  | 30-45          | 102.1 (±22)      | 132.6 (±16.1)      | 124.4 (±16.1) | 130.9 (±15.1)     | 117.1 (±11.9)     | 134 (±17.2)     | 130.9 (±17)        | 128 (±15)       | 130.6 (±15.8)        | 134.3 (±17.4)              |
|                  | 45-60          | 112.2 (±18.4)    | 138 (±15.2)        | 130.4 (±17.5) | 133 (±13.2)       | 119.5 (±23.3)     | 138 (±16.1)     | 135.1 (±15)        | 132.5 (±13.7)   | 133.4 (±15.7)        | 138.3 (±15.8)              |
| GFR &<br>Sex     | <20 & Male     | 79.2 (±18.3)     | 124.3 (±14.6)      | 116.5 (±17.3) | 110 (±10)         | 115.9 (±15.2)     | 125.6 (±18.5)   | 118.3 (±16.3)      |                 | 112.2 (±12.5)        | 119.3 (±14.9)              |
|                  | <20 & Female   | 85.4 (±19.7)     | 116.9 (±13.6)      | 113.3 (±12.8) | 122.5 (±12.6)     | 112.8 (±13.6)     | 120.8 (±12)     | 115.3 (±14.2)      |                 | 112.3 (±13.9)        | 115.8 (±12.9)              |
|                  | 20-30 & Male   | 103.3 (±20.4)    | 129.3 (±16.3)      | 124.1 (±16.7) | 127.5 (±15.6)     | 120.4 (±16.6)     | 131.6 (±16)     | 125.9 (±17.4)      | 121.8 (±14.1)   | 124 (±16.1)          | 128.5 (±17.1)              |
|                  | 20-30 & Female | 98 (±15.2)       | 121.8 (±13.4)      | 115.5 (±14.1) | 125.9 (±12.8)     | 117.9 (±14.8)     | 122.5 (±14.3)   | 120.2 (±13.6)      | 117.2 (±16.7)   | 118.5 (±15.3)        | 122.5 (±15.9)              |
|                  | 30-45 & Male   | 102.4 (±23.2)    | 136.1 (±16.3)      | 131.1 (±16.6) | 131.4 (±17.2)     | 118.9 (±10.2)     | 137.9 (±18)     | 134.4 (±17.9)      | 131.6 (±15.6)   | 135.2 (±15.9)        | 138.3 (±17.3)              |
|                  | 30-45 & Female | 101.9 (±20.9)    | 125.8 (±13.2)      | 118 (±12.7)   | 130.4 (±12.6)     | 114 (±14.2)       | 127.7 (±13.6)   | 125.5 (±13.9)      | 123.9 (±13.3)   | 126.7 (±14.6)        | 125.1 (±13.8)              |
|                  | 45-60 & Male   | 115 (±20.2)      | 141.3 (±15.2)      | 139.7 (±15.9) | 136.2 (±14.1)     | 119.5 (±23.3)     | 142 (±16.5)     | 137.8 (±15.3)      | 137.8 (±14.2)   | 137.5 (±16.3)        | 141.9 (±15)                |
|                  | 45-60 & Female | 107.1 (±13.7)    | 130.2 (±12.1)      | 119.7 (±12.7) | 130.4 (±11.8)     |                   | 131.5 (±13.1)   | 130.1 (±13.3)      | 128.3 (±11.7)   | 130.9 (±14.8)        | 128.8 (±13.9)              |

\*See Supplementary Table 1 for list of Countries

| Variable         |                | Pediatric     |               |                 |
|------------------|----------------|---------------|---------------|-----------------|
|                  |                | 4C            | CKiD          | KNOW-Ped<br>CKD |
|                  |                | Europe        | US            | KOREA           |
| Overall          |                | 116.9 (±16.2) | 120.2 (±16.5) | 116.7 (±19.9)   |
| Sex              | Male           | 118 (±16.4)   | 121.5 (±17.8) | 118.2 (±20.3)   |
|                  | Female         | 114.8 (±15.6) | 118.6 (±14.6) | 113.3 (±18.7)   |
| eGFR<br>Category | < 20           | 112.6 (±16.2) | 104.3 (±15.2) | 106.4 (±18.6)   |
|                  | 20-30          | 116.3 (±15.4) | 119.9 (±20.8) | 110.9 (±16.2)   |
|                  | 30-45          | 120.3 (±15.5) | 120.6 (±16.7) | 121.3 (±18.5)   |
|                  | 45-60          | 126.2 (±15.3) | 120.5 (±15.3) | 125.6 (±19)     |
| GFR &<br>Sex     | <20 & Male     | 113.1 (±16.1) | 118.0 (±)     | 107.3 (±19.3)   |
|                  | <20 & Female   | 111.5 (±16.4) | 97.5 (±13.4)  | 103.9 (±16.6)   |
|                  | 20-30 & Male   | 117.6 (±16.1) | 123.2 (±22.2) | 111.2 (±16.3)   |
|                  | 20-30 & Female | 113.5 (±13.6) | 115.3 (±18.9) | 109.9 (±16.9)   |
|                  | 30-45 & Male   | 121.7 (±15.6) | 122.4 (±18.6) | 123.6 (±18.3)   |
|                  | 30-45 & Female | 117.8 (±15.2) | 118.6 (±14.2) | 116.6 (±18.5)   |
|                  | 45-60 & Male   | 128 (±13.9)   | 120.5 (±16.6) | 128.8 (±18.4)   |
|                  | 45-60 & Female | 122.3 (±17.6) | 120.4 (±13.4) | 119.2 (±18.9)   |

Table S4. Cohort-specific levels of iron saturation (mean and standard deviation)

|               | Asia              |               |                   |                  | North America    | South America        |                 | Europe             |                        |
|---------------|-------------------|---------------|-------------------|------------------|------------------|----------------------|-----------------|--------------------|------------------------|
|               | C-STRIDE<br>CHINA | ICKD<br>INDIA | KNOW-CKD<br>KOREA | CKD-JAC<br>JAPAN | CKDopps US<br>US | CKDopps BR<br>BRAZIL | NRHP<br>URUGUAY | CKD-REIN<br>FRANCE | CKDopps GER<br>GERMANY |
| N             | 311               | 2042          | 1399              | 1304             | 533              | 199                  | 2427            | 2220               | 1032                   |
| Available %   | 13.5%             | 58.2%         | 97.8%             | 52.3%            | 25.2%            | 27.6%                | 12.6%           | 75.4%              | 39.1%                  |
| Ascertainment | Routine care      | Routine care  | Study protocol    | Routine care     | Routine care     | Routine care         | Routine care    | Study protocol     | Routine care           |
| Mean (SD)     | 25.3 (±10.2)      | 23.6 (±18.6)  | 30.9 (±11.3)      | 30.3 (±11.9)     | 23.2 (±11)       | 26.2 (±11.4)         | 26.2 (±12.7)    | 24.9 (±9.8)        | 22.8 (±9.7)            |

Table S5. Cohort-specific and pooled estimates for the interaction between eGFR and sex. Estimates represent the difference in the slope of the relationship between eGFR and hemoglobin between men and women. A negative beta coefficient indicates that women, on average, had a smaller increase in hemoglobin per unit increase in eGFR.

| Cohort               | Country                     | Estimate            | S.E. | p     |
|----------------------|-----------------------------|---------------------|------|-------|
| CORE-CKD             | THAILAND                    | -1.0                | 1.1  | 0.39  |
| C-STRIDE             | CHINA                       | -2.2                | 0.6  | <.001 |
| ICKD                 | INDIA                       | -1.1                | 0.7  | 0.12  |
| KNOW-CKD             | KOREA                       | -3.4                | 0.6  | <.001 |
| CKD-JAC              | JAPAN                       | -2.1                | 0.4  | <.001 |
| CKD.QLD              | AUSTRALIA                   | -2.2                | 0.6  | <.001 |
| CanPREDDICT          | CANADA                      | -1.3                | 0.7  | 0.07  |
| CRIC                 | US                          | -1.1                | 0.4  | 0.01  |
| CKDopps US           | US                          | -1.0                | 0.7  | 0.14  |
| CKDopps BR           | BRAZIL                      | -3.4                | 1.0  | <.001 |
| NRHP                 | URUGUAY                     | -1.7                | 0.2  | <.001 |
| H3AKDN<br>Enugu      | NIGERIA                     | -1.8                | 1.3  | 0.18  |
| CKD-REIN             | FRANCE                      | -1.1                | 0.5  | 0.03  |
| RIISC                | UK                          | -4.4                | 1.0  | <.001 |
| CKDBIS               | GERMANY                     | -2.7                | 0.9  | 0.034 |
| EQUAL                | EUROPE VARIOUS              | 0.4                 | 1.4  | 0.75  |
| GCKD                 | GERMANY                     | -0.8                | 0.5  | 0.12  |
| CKDopps GER          | GERMANY                     | -1.6                | 0.7  | 0.01  |
| PSI BIND-NL          | NETHERLANDS                 | -2.6                | 1.0  | 0.01  |
| RRID                 | ENGLAND                     | -1.6                | 0.9  | 0.08  |
| PROVALID             | EUROPE VARIOUS              | -1.4                | 1.1  | 0.20  |
|                      | <b>Pooled Stats [95%CI]</b> | -1.8 [-2.2; -1.4]   |      | <.001 |
| <b>Meta-analysis</b> | $\tau^2$ [95% CI]           | 0.6 [0.0; 1.5]      |      |       |
|                      | $\tau$ [95% CI]             | 0.8 [0.0; 1.2]      |      |       |
|                      | $I^2$ [95% CI]              | 39.6% [0.0%; 64.1%] |      |       |
|                      | <b>Q test</b>               | 33.1                | 20   | 0.03  |

Table S6a. Cohort-specific and pooled estimates for the mean difference in hemoglobin in women compared to men at an eGFR value of 15mL/min per 1.73m<sup>2</sup>.

| Cohort               | Country                       | Core Model           |      |       | Extended MV Model    |      |       |
|----------------------|-------------------------------|----------------------|------|-------|----------------------|------|-------|
|                      |                               | Estimate             | S.E. | p     | Estimate             | S.E. | p     |
| CORE-CKD             | THAILAND                      | -12.4                | 2.7  | <.001 | -11.5                | 2.7  | <.001 |
| C-STRIDE             | CHINA                         | -10.1                | 1.3  | <.001 | -9.9                 | 1.3  | <.001 |
| ICKD                 | INDIA                         | -9.5                 | 1.8  | <.001 | -10.0                | 1.7  | <.001 |
| KNOW-CKD             | KOREA                         | -6.1                 | 1.4  | <.001 | -7.5                 | 1.3  | <.001 |
| CKD-JAC              | JAPAN                         | -6.6                 | 1.0  | <.001 | -6.5                 | 1.0  | <.001 |
| CKD.QLD              | AUSTRALIA                     | -2.4                 | 1.3  | 0.07  | -2.7                 | 1.3  | 0.04  |
| CanPREDICT           | CANADA                        | -4.8                 | 1.1  | <.001 | -5.2                 | 1.1  | <.001 |
| CRIC                 | US                            | -7.6                 | 1.3  | <.001 | -7.5                 | 1.3  | <.001 |
| CKDopps US           | US                            | -7.1                 | 1.1  | <.001 | -7.5                 | 1.1  | <.001 |
| CKDopps BR           | BRAZIL                        | -5.4                 | 1.6  | 0.001 | -5.6                 | 1.6  | <.001 |
| NRHP                 | URUGUAY                       | -4.8                 | 0.5  | <.001 | -5.1                 | 0.5  | <.001 |
| H3AKDN               | NIGERIA                       |                      |      |       |                      |      |       |
| Enugu                |                               | 2.8                  | 2.5  | 0.26  | -                    | -    | -     |
| CKD-REIN             | FRANCE                        | -7.3                 | 1.0  | <.001 | -7.8                 | 1.0  | <.001 |
| RIISC                | UK                            | -4.1                 | 2.1  | 0.05  | -                    | -    | -     |
| CKDBIS               | GERMANY                       | 4.3                  | 3.0  | 0.15  | -                    | -    | -     |
| EQUAL                | EUROPE VARIOUS                | -2.9                 | 0.8  | <.001 | -2.7                 | 0.8  | <.001 |
| GCKD                 | GERMANY                       | -8.0                 | 1.5  | <.001 | -7.9                 | 1.5  | <.001 |
| CKDopps GER          | GERMANY                       | -3.5                 | 0.9  | <.001 | -3.9                 | 0.9  | <.001 |
| PSI BIND-NL          | NETHERLANDS                   | -4.6                 | 2.1  | 0.02  | -                    | -    | -     |
| RRID                 | ENGLAND                       | -3.4                 | 3.2  | 0.28  | -                    | -    | -     |
| PROVALID             | EUROPE VARIOUS                | -2.3                 | 3.4  | 0.49  | -                    | -    | -     |
|                      | <b>Pooled Stats [95%CI]</b>   | -5.3 [-6.9; -3.7]    |      | <.001 | -6.5[-7.9; -5.1]     |      | <.001 |
| <b>Meta-analysis</b> | <b>τ<sup>2</sup> [95% CI]</b> | 10.9 [3.8; 25.7]     |      |       | 4.9 [1.6; 14.3]      |      |       |
|                      | <b>τ [95% CI]</b>             | 3.3 [1.9; 5.1]       |      |       | 2.2 [1.3; 3.8]       |      |       |
|                      | <b>I<sup>2</sup> [95% CI]</b> | 75.7% [63.0%; 84.0%] |      |       | 76.3% [61.0%; 85.6%] |      |       |
|                      | <b>Q test</b>                 | 82.3                 | 20   | <.001 | 59.1                 | 14   | <.001 |

Reference = Male

The extended multivariable model included age (continuous), year of study entry, sex, eGFR (per 10 mL increase), sex\*eGFR interaction term, etiology of CKD, diabetes mellitus, coronary artery disease, heart failure, urine ACR (categorical), body mass index (categorical)



Table S6b. Cohort-specific and pooled estimates for the mean difference in hemoglobin in women compared to men at an eGFR value of 30mL/min per 1.73m<sup>2</sup>.

| Cohort               | Country                             | Core Model           |      |       | Extended MV Model    |      |       |
|----------------------|-------------------------------------|----------------------|------|-------|----------------------|------|-------|
|                      |                                     | Estimate             | S.E. | p     | Estimate             | S.E. | p     |
| CORE-CKD             | THAILAND                            | -13.8                | 1.5  | <.001 | -13.0                | 1.5  | <.001 |
| C-STRIDE             | CHINA                               | -13.4                | 0.8  | <.001 | -13.0                | 0.8  | <.001 |
| ICKD                 | INDIA                               | -11.0                | 0.9  | <.001 | -11.7                | 0.9  | <.001 |
| KNOW-CKD             | KOREA                               | -11.3                | 0.9  | <.001 | -12.0                | 0.8  | <.001 |
| CKD-JAC              | JAPAN                               | -9.9                 | 0.6  | <.001 | -9.7                 | 0.6  | <.001 |
| CKD.QLD              | AUSTRALIA                           | -5.7                 | 0.8  | <.001 | -6.0                 | 0.8  | <.001 |
| CanPREDDICT          | CANADA                              | -6.7                 | 0.6  | <.001 | -7.2                 | 0.6  | <.001 |
| CRIC                 | US                                  | -9.3                 | 0.7  | <.001 | -9.6                 | 0.7  | <.001 |
| CKDopps US           | US                                  | -8.6                 | 0.8  | <.001 | -9.0                 | 0.8  | <.001 |
| CKDopps BR           | BRAZIL                              | -10.6                | 1.3  | <.001 | -10.3                | 1.3  | <.001 |
| NRHP                 | URUGUAY                             | -7.4                 | 0.3  | <.001 | -7.6                 | 0.3  | <.001 |
| H3AKDN<br>Enugu      | NIGERIA                             | 0.2                  | 2.3  | 0.93  | -                    | -    | -     |
| CKD-REIN             | FRANCE                              | -8.9                 | 0.6  | <.001 | -9.4                 | 0.6  | <.001 |
| RIISC                | UK                                  | -10.4                | 1.2  | <.001 | -                    | -    | -     |
| CKDBIS               | GERMANY                             | 0.1                  | 1.7  | 0.98  | -                    | -    | -     |
| EQUAL                | EUROPE VARIOUS                      | -2.3                 | 1.9  | 0.23  | -2.1                 | 1.9  | 0.27  |
| GCKD                 | GERMANY                             | -9.2                 | 0.8  | <.001 | -9.1                 | 0.8  | <.001 |
| CKDopps GER          | GERMANY                             | -6.1                 | 0.7  | <.001 | -6.3                 | 0.7  | <.001 |
| PSI BIND-NL          | NETHERLANDS                         | -8.6                 | 1.3  | <.001 | -                    | -    | -     |
| RRID                 | ENGLAND                             | -6.0                 | 1.8  | <.001 | -                    | -    | -     |
| PROVALID             | EUROPE VARIOUS                      | -4.6                 | 2.0  | 0.02  | -                    | -    | -     |
| <b>Meta-analysis</b> | <b>Pooled Stats [95%CI]</b>         | -7.9 [-9.7; -6.3]    |      | <.001 | -9.1 [-10.7; -7.6]   |      | <.001 |
|                      | <b><math>\tau^2</math> [95% CI]</b> | 12.4 [6.1; 28.0]     |      |       | 7.0 [3.0; 19.3]      |      |       |
|                      | <b><math>\tau</math> [95% CI]</b>   | 3.5 [2.5; 5.3]       |      |       | 2.6 [1.7; 4.4]       |      |       |
|                      | <b><math>I^2</math> [95% CI]</b>    | 89.2% [84.9%; 92.3%] |      |       | 89.0% [83.6%; 92.7%] |      |       |
|                      | <b>Q test</b>                       | 185.2                | 20   | <.001 | 127.7                | 14   | <.001 |

Reference = Male

The extended multivariable model included age (continuous), year of study entry, sex, eGFR (per 10 mL increase), sex\*eGFR interaction term, etiology of CKD, diabetes mellitus, coronary artery disease, heart failure, urine ACR (categorical), body mass index (categorical)

Table S6c. Cohort-specific and pooled estimates for the mean difference in hemoglobin in women compared to men at an eGFR value of 45mL/min per 1.73m<sup>2</sup>.

| Cohort          | Country                             | Core Model           |      |       | Extended MV Model |                      |       |       |
|-----------------|-------------------------------------|----------------------|------|-------|-------------------|----------------------|-------|-------|
|                 |                                     | Estimate             | S.E. | p     | Estimate          | S.E.                 | p     |       |
| CORE-CKD        | THAILAND                            | -15.2                | 1.7  | <.001 | -14.4             | 1.7                  | <.001 |       |
| C-STRIDE        | CHINA                               | -16.7                | 1.0  | <.001 | -16.0             | 1.0                  | <.001 |       |
| ICKD            | INDIA                               | -12.5                | 0.8  | <.001 | -13.4             | 0.8                  | <.001 |       |
| KNOW-CKD        | KOREA                               | -16.5                | 1.1  | <.001 | -16.4             | 1.1                  | <.001 |       |
| CKD-JAC         | JAPAN                               | -13.1                | 0.8  | <.001 | -12.8             | 0.8                  | <.001 |       |
| CKD.QLD         | AUSTRALIA                           | -9.0                 | 1.2  | <.001 | -9.4              | 1.2                  | <.001 |       |
| CanPREDDICT     | CANADA                              | -8.6                 | 1.4  | <.001 | -9.2              | 1.3                  | <.001 |       |
| CRIC            | US                                  | -11.0                | 0.5  | <.001 | -11.7             | 0.5                  | <.001 |       |
| CKDopps US      | US                                  | -10.1                | 1.5  | <.001 | -10.4             | 1.5                  | <.001 |       |
| CKDopps BR      | BRAZIL                              | -15.7                | 2.3  | <.001 | -15.0             | 2.3                  | <.001 |       |
| NRHP            | URUGUAY                             | -9.9                 | 0.3  | <.001 | -10.2             | 0.3                  | <.001 |       |
| H3AKDN<br>Enugu | NIGERIA                             | -2.4                 | 3.5  | 0.49  | -                 | -                    | -     |       |
| CKD-REIN        | FRANCE                              | -10.6                | 0.9  | <.001 | -11.0             | 0.9                  | <.001 |       |
| RIISC           | UK                                  | -16.8                | 1.8  | <.001 | -                 | -                    | -     |       |
| CKDBIS          | GERMANY                             | -4.2                 | 1.0  | <.001 | -                 | -                    | -     |       |
| EQUAL           | EUROPE VARIOUS                      | -1.6                 | 3.8  | 0.68  | -1.4              | 3.8                  | 0.71  |       |
| GCKD            | GERMANY                             | -10.3                | 0.5  | <.001 | -10.4             | 0.6                  | <.001 |       |
| CKDopps GER     | GERMANY                             | -8.6                 | 1.4  | <.001 | -8.7              | 1.4                  | <.001 |       |
| PSI BIND-NL     | NETHERLANDS                         | -12.6                | 1.9  | <.001 | -                 | -                    | -     |       |
| RRID            | ENGLAND                             | -8.6                 | 0.8  | <.001 | -                 | -                    | -     |       |
| PROVALID        | EUROPE VARIOUS                      | -6.9                 | 1.2  | <.001 | -                 | -                    | -     |       |
| Meta-analysis   | <b>Pooled Stats [95%CI]</b>         | -10.8 [-12.6; -8.9]  |      |       | <.001             | -11.7 [-13.5; -10.0] |       | <.001 |
|                 | <b><math>\tau^2</math> [95% CI]</b> | 15.2 [7.0; 35.0]     |      |       |                   | 9.3 [2.9; 27.3]      |       |       |
|                 | <b><math>\tau</math> [95% CI]</b>   | 3.9 [2.7; 5.9]       |      |       |                   | 3.0 [1.7; 5.2]       |       |       |
|                 | <b><math>I^2</math> [95% CI]</b>    | 89.0% [84.6%; 92.2%] |      |       |                   | 84.9% [76.5%; 90.3%] |       |       |
|                 | <b>Q test</b>                       | 182.3                | 20   | <.001 | 92.6              | 14                   | <.001 |       |

Reference = Male

The extended multivariable model included age (continuous), year of study entry, sex, eGFR (per 10 mL increase), sex\*eGFR interaction term, etiology of CKD, diabetes mellitus, coronary artery disease, heart failure, urine ACR (categorical), body mass index (categorical)

Table S6d. Cohort-specific and pooled estimates for the mean difference in hemoglobin in women compared to men at an eGFR value of 60mL/min per 1.73m<sup>2</sup>.

| Cohort               | Country                             | Core Model           |      |       | Extended MV Model |                      |       |       |
|----------------------|-------------------------------------|----------------------|------|-------|-------------------|----------------------|-------|-------|
|                      |                                     | Estimate             | S.E. | p     | Estimate          | S.E.                 | p     |       |
| CORE-CKD             | THAILAND                            | -16.6                | 3.1  | <.001 | -15.9             | 3.0                  | <.001 |       |
| C-STRIDE             | CHINA                               | -20.0                | 1.8  | <.001 | -19.1             | 1.7                  | <.001 |       |
| ICKD                 | INDIA                               | -14.0                | 1.6  | <.001 | -15.2             | 1.6                  | <.001 |       |
| KNOW-CKD             | KOREA                               | -21.7                | 1.8  | <.001 | -20.9             | 1.8                  | <.001 |       |
| CKD-JAC              | JAPAN                               | -16.4                | 1.3  | <.001 | -16.0             | 1.3                  | <.001 |       |
| CKD.QLD              | AUSTRALIA                           | -12.3                | 2.0  | <.001 | -12.7             | 1.9                  | <.001 |       |
| CanPREDDICT          | CANADA                              | -10.5                | 2.3  | <.001 | -11.3             | 2.3                  | <.001 |       |
| CRIC                 | US                                  | -12.6                | 0.9  | <.001 | -13.7             | 0.9                  | <.001 |       |
| CKDopps US           | US                                  | -11.6                | 2.5  | <.001 | -11.9             | 2.4                  | <.001 |       |
| CKDopps BR           | BRAZIL                              | -20.9                | 3.7  | <.001 | -19.8             | 3.7                  | <.001 |       |
| NRHP                 | URUGUAY                             | -12.5                | 0.6  | <.001 | -12.8             | 0.6                  | <.001 |       |
| H3AKDN               |                                     |                      |      |       |                   |                      |       |       |
| Enugu                | NIGERIA                             | -5.0                 | 5.2  | 0.34  | -                 | -                    | -     |       |
| CKD-REIN             | FRANCE                              | -12.2                | 1.6  | <.001 | -12.6             | 1.6                  | <.001 |       |
| RIISC                | UK                                  | -23.1                | 3.1  | <.001 | -                 | -                    | -     |       |
| CKDBIS               | GERMANY                             | -8.5                 | 1.7  | <.001 | -                 | -                    | -     |       |
| EQUAL                | EUROPE VARIOUS                      | -0.9                 | 5.8  | 0.87  | -0.8              | 5.8                  | 0.90  |       |
| GCKD                 | GERMANY                             | -11.5                | 1.1  | <.001 | -11.6             | 1.1                  | <.001 |       |
| CKDopps GER          | GERMANY                             | -11.1                | 2.4  | <.001 | -11.2             | 2.3                  | <.001 |       |
| PSI BIND-NL          | NETHERLANDS                         | -16.6                | 3.2  | <.001 | -                 | -                    | -     |       |
| RRID                 | ENGLAND                             | -11.3                | 1.4  | <.001 | -                 | -                    | -     |       |
| PROVALID             | EUROPE VARIOUS                      | -9.2                 | 2.0  | <.001 | -                 | -                    | -     |       |
| <b>Meta-analysis</b> | <b>Pooled Stats [95%CI]</b>         | -13.5 [-15.7; -11.4] |      |       | <.001             | -14.1 [-16.3; -12.0] |       | <.001 |
|                      | <b><math>\tau^2</math> [95% CI]</b> | 20.1 [7.0; 47.5]     |      |       |                   | 13.3 [2.7; 39.8]     |       |       |
|                      | <b><math>\tau</math> [95% CI]</b>   | 4.5 [2.7; 6.9]       |      |       |                   | 3.6 [1.7; 6.3]       |       |       |
|                      | <b><math>I^2</math> [95% CI]</b>    | 76.9% [65.0%; 84.7%] |      |       |                   | 71.5% [52.0%; 83.1%] |       |       |
|                      | <b>Q test</b>                       | 86.5                 | 20   | <.001 | 49.2              | 14                   | <.001 |       |

Reference = Male

The extended multivariable model included age (continuous), year of study entry, sex, eGFR (per 10 mL increase), sex\*eGFR interaction term, etiology of CKD, diabetes mellitus, coronary artery disease, heart failure, urine ACR (categorical), body mass index (categorical)

Table S7a. Cohort-specific and pooled estimates for the mean difference in hemoglobin per 10 mL/min per 1.73m<sup>2</sup> increase in eGFR in men.

| Cohort        | Country                             | Core Model           |      |       | Extended MV Model    |      |       |
|---------------|-------------------------------------|----------------------|------|-------|----------------------|------|-------|
|               |                                     | Estimate             | S.E. | p     | Estimate             | S.E. | p     |
| CORE-CKD      | THAILAND                            | 6.0                  | 0.7  | <.001 | 4.8                  | 0.7  | <.001 |
| C-STRIDE      | CHINA                               | 7.1                  | 0.4  | <.001 | 6.9                  | 0.4  | <.001 |
| ICKD          | INDIA                               | 3.6                  | 0.4  | <.001 | 3.3                  | 0.4  | <.001 |
| KNOW-CKD      | KOREA                               | 7.7                  | 0.4  | <.001 | 6.7                  | 0.4  | <.001 |
| CKD-JAC       | JAPAN                               | 6.7                  | 0.3  | <.001 | 6.4                  | 0.3  | <.001 |
| CKD.QLD       | AUSTRALIA                           | 6.7                  | 0.4  | <.001 | 6.4                  | 0.4  | <.001 |
| CanPREDDICT   | CANADA                              | 4.8                  | 0.4  | <.001 | 4.5                  | 0.4  | <.001 |
| CRIC          | US                                  | 5.0                  | 0.3  | <.001 | 4.3                  | 0.3  | <.001 |
| CKDopps US    | US                                  | 6.4                  | 0.5  | <.001 | 6.0                  | 0.5  | <.001 |
| CKDopps BR    | BRAZIL                              | 8.6                  | 0.7  | <.001 | 8.4                  | 0.7  | <.001 |
| NRHP          | URUGUAY                             | 5.9                  | 0.1  | <.001 | 5.7                  | 0.1  | <.001 |
| H3AKDN        |                                     |                      |      |       |                      |      |       |
| Enugu         | NIGERIA                             | 7.9                  | 0.9  | <.001 | -                    | -    | -     |
| CKD-REIN      | FRANCE                              | 5.0                  | 0.3  | <.001 | 4.8                  | 0.3  | <.001 |
| RIISC         | UK                                  | 6.2                  | 0.6  | <.001 | -                    | -    | -     |
| CKDBIS        | GERMANY                             | 3.8                  | 0.7  | <.001 | -                    | -    | -     |
| EQUAL         | EUROPE VARIOUS                      | 4.9                  | 0.8  | <.001 | 4.7                  | 0.8  | <.001 |
| GCKD          | GERMANY                             | 3.9                  | 0.3  | <.001 | 3.9                  | 0.3  | <.001 |
| CKDopps GER   | GERMANY                             | 6.0                  | 0.4  | <.001 | 5.8                  | 0.4  | <.001 |
| PSI BIND-NL   | NETHERLANDS                         | 6.2                  | 0.6  | <.001 | -                    | -    | -     |
| RRID          | ENGLAND                             | 5.1                  | 0.7  | <.001 | -                    | -    | -     |
| PROVALID      | EUROPE VARIOUS                      | 5.1                  | 0.8  | <.001 | -                    | -    | -     |
| Meta-analysis | <b>Pooled Stats [95%CI]</b>         | 5.8 [5.2; 6.4]       |      | <.001 | 5.5 [4.8; 6.2]       |      | <.001 |
|               | <b><math>\tau^2</math> [95% CI]</b> | 1.5 [0.8; 3.4]       |      |       | 1.6 [0.7; 4.2]       |      |       |
|               | <b><math>\tau</math> [95% CI]</b>   | 1.2 [0.9; 1.9]       |      |       | 1.3 [0.9; 2.1]       |      |       |
|               | <b><math>I^2</math> [95% CI]</b>    | 88.4% [83.7%; 91.8%] |      |       | 90.3% [85.6%; 93.4%] |      |       |
|               | <b>Q test</b>                       | 173.1                | 20   | <.001 | 143.8                | 14   | <.001 |

The extended multivariable model included age (continuous), year of study entry, sex, eGFR (per 10 mL increase), sex\*eGFR interaction term, etiology of CKD, diabetes mellitus, coronary artery disease, heart failure, urine ACR (categorical), body mass index (categorical)

Table S7b. Cohort-specific and pooled estimates for the mean difference in hemoglobin per 10 mL/min per 1.73m<sup>2</sup> increase in eGFR in women.

| Cohort        | Country                             | Core Model           |      |       | Extended MV Model    |      |       |
|---------------|-------------------------------------|----------------------|------|-------|----------------------|------|-------|
|               |                                     | Estimate             | S.E. | p     | Estimate             | S.E. | p     |
| CORE-CKD      | THAILAND                            | 5.1                  | 0.9  | <.001 | 3.9                  | 0.9  | <.001 |
| C-STRIDE      | CHINA                               | 4.9                  | 0.4  | <.001 | 4.8                  | 0.4  | <.001 |
| ICKD          | INDIA                               | 2.6                  | 0.5  | <.001 | 2.1                  | 0.5  | <.001 |
| KNOW-CKD      | KOREA                               | 4.2                  | 0.5  | <.001 | 3.7                  | 0.5  | <.001 |
| CKD-JAC       | JAPAN                               | 4.5                  | 0.3  | <.001 | 4.3                  | 0.3  | <.001 |
| CKD.QLD       | AUSTRALIA                           | 4.5                  | 0.5  | <.001 | 4.2                  | 0.5  | <.001 |
| CanPREDDICT   | CANADA                              | 3.5                  | 0.6  | <.001 | 3.2                  | 0.6  | <.001 |
| CRIC          | US                                  | 3.9                  | 0.3  | <.001 | 2.9                  | 0.3  | <.001 |
| CKDopps US    | US                                  | 5.4                  | 0.5  | <.001 | 5.0                  | 0.5  | <.001 |
| CKDopps BR    | BRAZIL                              | 5.2                  | 0.7  | <.001 | 5.2                  | 0.8  | <.001 |
| NRHP          | URUGUAY                             | 4.2                  | 0.2  | <.001 | 4.0                  | 0.2  | <.001 |
| H3AKDN        |                                     |                      |      |       |                      |      |       |
| Enugu         | NIGERIA                             | 6.2                  | 1.0  | <.001 | -                    | -    | -     |
| CKD-REIN      | FRANCE                              | 3.9                  | 0.4  | <.001 | 3.7                  | 0.4  | <.001 |
| RIISC         | UK                                  | 2.0                  | 0.8  | 0.02  | -                    | -    | -     |
| CKDBIS        | GERMANY                             | 1.0                  | 0.7  | 0.14  | -                    | -    | -     |
| EQUAL         | EUROPE VARIOUS                      | 5.4                  | 1.1  | <.001 | 5.2                  | 1.1  | <.001 |
| GCKD          | GERMANY                             | 3.1                  | 0.4  | <.001 | 3.0                  | 0.4  | <.001 |
| CKDopps GER   | GERMANY                             | 4.3                  | 0.5  | <.001 | 4.2                  | 0.5  | <.001 |
| PSI BIND-NL   | NETHERLANDS                         | 3.5                  | 0.8  | <.001 | -                    | -    | -     |
| RRID          | ENGLAND                             | 3.4                  | 0.6  | <.001 | -                    | -    | -     |
| PROVALID      | EUROPE VARIOUS                      | 3.6                  | 0.7  | <.001 | -                    | -    | -     |
| Meta-analysis | <b>Pooled Stats [95%CI]</b>         | 4.0 [3.5; 4.5]       |      | <.001 | 3.9 [3.4; 4.4]       |      | <.001 |
|               | <b><math>\tau^2</math> [95% CI]</b> | 1.1 [0.4; 2.5]       |      |       | 0.6 [0.1; 1.6]       |      |       |
|               | <b><math>\tau</math> [95% CI]</b>   | 1.0 [0.6; 1.6]       |      |       | 0.7 [0.4; 1.3]       |      |       |
|               | <b><math>I^2</math> [95% CI]</b>    | 69.7% [52.6%; 80.6%] |      |       | 66.5% [42.3%; 80.5%] |      |       |
|               | <b>Q test</b>                       | 66.0                 | 20   | <.001 | 41.8                 | 14   | <.001 |

The extended multivariable model included age (continuous), year of study entry, sex, eGFR (per 10 mL increase), sex\*eGFR interaction term, etiology of CKD, diabetes mellitus, coronary artery disease, heart failure, urine ACR (categorical), body mass index (categorical)

Table S8a. Cohort-specific and pooled estimates for the mean difference in hemoglobin according to etiology of CKD using an unadjusted model.

| Cohort        | Country                             | HTN                  |      |        | PKD                 |      |        | GN                   |      |        | Other                |      |        |
|---------------|-------------------------------------|----------------------|------|--------|---------------------|------|--------|----------------------|------|--------|----------------------|------|--------|
|               |                                     | Estimate             | S.E. | p      | Estimate            | S.E. | p      | Estimate             | S.E. | p      | Estimate             | S.E. | p      |
| CORE-CKD      | THAILAND                            | 10.5                 | 1.7  | <0.001 | 10.4                | 3.9  | 0.01   | 9.7                  | 3.0  | 0.001  | 13.6                 | 1.6  | <0.001 |
| C-STRIDE      | CHINA                               | -                    | -    | -      | -                   | -    | -      | 10.9                 | 1.3  | <0.001 | 10.5                 | 1.3  | <0.001 |
| ICKD          | INDIA                               | 9.9                  | 1.3  | <0.001 | 8.8                 | 1.9  | <0.001 | 7.3                  | 1.1  | <0.001 | 7.1                  | 0.8  | <0.001 |
| KNOW-CKD      | KOREA                               | 14.9                 | 1.3  | <0.001 | 9.5                 | 1.8  | <0.001 | 10.4                 | 1.2  | <0.001 | 7.8                  | 2.2  | <0.001 |
| CKD-JAC       | JAPAN                               | 8.4                  | 1.1  | <0.001 | -                   | -    | -      | 6.7                  | 0.9  | <0.001 | 8.0                  | 1.2  | <0.001 |
| CKD.QLD       | AUSTRALIA                           | 4.8                  | 1.4  | <0.001 | 4.0                 | 2.9  | 0.17   | 5.5                  | 1.8  | 0.002  | 6.0                  | 1.2  | <0.001 |
| CanPREDDICT   | CANADA                              | 3.8                  | 0.8  | <0.001 | 6.5                 | 1.6  | <0.001 | 5.8                  | 1.1  | <0.001 | 4.7                  | 0.8  | <0.001 |
| CRIC          | US                                  | 10.3                 | 0.8  | <0.001 | -                   | -    | -      | -                    | -    | -      | 9.2                  | 0.6  | <0.001 |
| CKDopps US    | US                                  | 4.7                  | 1.2  | <0.001 | 5.4                 | 3.5  | 0.12   | 0.3                  | 2.0  | 0.87   | 3.0                  | 1.0  | 0.004  |
| CKDopps BR    | BRAZIL                              | 5.5                  | 1.8  | 0.002  | 3.4                 | 3.7  | 0.35   | 4.1                  | 2.7  | 0.13   | 4.3                  | 1.9  | 0.02   |
| NRHP          | URUGUAY                             | 4.8                  | 0.5  | <0.001 | 5.4                 | 1.2  | <0.001 | 1.0                  | 0.8  | 0.20   | 3.3                  | 0.5  | <0.001 |
| H3AKDN        | NIGERIA                             | 3.3                  | 5.8  | 0.56   | -13.4               | 8.3  | 0.11   | -8.7                 | 3.4  | 0.01   | 2.2                  | 3.3  | 0.50   |
| CKD-REIN      | FRANCE                              | 4.8                  | 0.9  | <0.001 | 5.4                 | 1.4  | <0.001 | 2.6                  | 1.0  | 0.01   | 3.6                  | 0.8  | <0.001 |
| RIISC         | UK                                  | 7.9                  | 1.9  | <0.001 | 8.0                 | 2.9  | 0.01   | 14.4                 | 2.4  | <0.001 | 7.2                  | 1.8  | <0.001 |
| CKDBIS        | GERMANY                             | -                    | -    | -      | -                   | -    | -      | -                    | -    | -      | -                    | -    | -      |
| EQUAL         | EUROPE VARIOUS                      | 2.3                  | 1.0  | 0.02   | 5.3                 | 2.4  | 0.03   | 0.9                  | 1.4  | 0.52   | 0.9                  | 1.0  | 0.36   |
| GCKD          | GERMANY                             | 4.7                  | 0.9  | <0.001 | 3.2                 | 1.5  | 0.03   | 1.0                  | 0.9  | 0.29   | 1.7                  | 0.8  | 0.03   |
| CKDopps GER   | GERMANY                             | 1.6                  | 0.8  | 0.04   | 5.1                 | 2.0  | 0.01   | 0.0                  | 1.3  | 0.98   | 0.7                  | 0.9  | 0.42   |
| PSI BIND-NL   | NETHERLANDS                         | 9.9                  | 3.6  | 0.01   | 15.9                | 4.2  | <0.001 | 10.4                 | 3.3  | <0.001 | 9.5                  | 2.9  | <0.001 |
| RRID          | ENGLAND                             | -                    | -    | -      | -                   | -    | -      | -                    | -    | -      | -                    | -    | -      |
| PROVALID      | EUROPE VARIOUS                      | -                    | -    | -      | -                   | -    | -      | -                    | -    | -      | -                    | -    | -      |
| Meta-Analysis | <b>Pooled Stats [95%CI]</b>         | 6.6 [ 4.7; 8.4]      |      | <.001  | 6.2 [ 3.9; 8.5]     |      | <.001  | 4.8 [ 2.1; 7.6]      |      | 0.002  | 5.6 [ 3.9; 7.4]      |      | <.001  |
|               | <b><math>\tau^2</math> [95% CI]</b> | 10.7 [5.2; 26.9]     |      |        | 17.6 [0.0; 51.5]    |      |        | 25.6 [11.4; 65.7]    |      |        | 11.0 [5.4; 26.9]     |      |        |
|               | <b><math>\tau</math> [95% CI]</b>   | 3.3 [2.3; 5.2]       |      |        | 4.2 [0.0; 7.2]      |      |        | 5.1 [3.4; 8.1]       |      |        | 3.3 [2.3; 5.2]       |      |        |
|               | <b><math>I^2</math> [95% CI]</b>    | 89.8% [85.3%; 92.9%] |      |        | 41.8% [0.0%; 68.4%] |      |        | 89.6% [85.0%; 92.8%] |      |        | 90.9% [87.2%; 93.6%] |      |        |
|               | <b>Q test</b>                       | 156.9                | 16   | <.001  | 24.1                | 14   | 0.05   | 154.5                | 16   | <.001  | 187.8                | 17   | <.001  |

Reference = Diabetic kidney disease

Table S8b. Cohort-specific and pooled estimates for the mean difference in hemoglobin according to etiology of CKD using the extended multivariable model for patients with diabetes mellitus.

| Cohort               | Country                             | HTN                  |      |        | PKD                |      |        | GN                   |      |        | Other                |      |        |
|----------------------|-------------------------------------|----------------------|------|--------|--------------------|------|--------|----------------------|------|--------|----------------------|------|--------|
|                      |                                     | Estimate             | S.E. | p      | Estimate           | S.E. | p      | Estimate             | S.E. | p      | Estimate             | S.E. | p      |
| CORE-CKD             | THAILAND                            | 4.8                  | 2.0  | 0.02   | 8.0                | 3.8  | 0.04   | 7.8                  | 3.2  | 0.01   | 7.9                  | 1.8  | <.0001 |
| C-STRIDE             | CHINA                               | -                    | -    | -      | -                  | -    | -      | 9.1                  | 1.5  | <.0001 | 9.6                  | 1.5  | <.0001 |
| ICKD                 | INDIA                               | 5.0                  | 1.3  | <0.001 | 3.6                | 1.9  | 0.06   | 2.3                  | 1.2  | 0.06   | 3.0                  | 1.0  | 0.002  |
| KNOW-CKD             | KOREA                               | 9.5                  | 1.6  | <0.001 | 4.9                | 2.0  | 0.02   | 8.9                  | 1.7  | <.0001 | 5.9                  | 1.8  | <.0001 |
| CKD-JAC              | JAPAN                               | 6.4                  | 1.1  | <0.001 | -                  | -    | -      | 6.0                  | 1.0  | <.0001 | 6.8                  | 1.2  | <.0001 |
| CKD.QLD              | AUSTRALIA                           | 3.2                  | 1.4  | 0.03   | 0.6                | 2.8  | 0.84   | -0.8                 | 1.8  | 0.67   | 2.3                  | 1.3  | 0.07   |
| CanPREDDICT          | CANADA                              | 1.4                  | 1.0  | 0.16   | 3.8                | 1.6  | 0.02   | 3.1                  | 1.2  | 0.01   | 2.3                  | 0.9  | 0.01   |
| CRIC                 | US                                  | 5.2                  | 0.9  | <0.001 | -                  | -    | -      | -                    | -    | -      | 4.2                  | 0.7  | <.0001 |
| CKDopps US           | US                                  | 2.6                  | 1.2  | 0.04   | 5.1                | 3.2  | 0.12   | -0.6                 | 1.9  | 0.77   | 1.9                  | 1.2  | 0.12   |
| CKDopps BR           | BRAZIL                              | 3.7                  | 2.0  | 0.06   | 6.8                | 3.7  | 0.07   | 2.8                  | 2.9  | 0.32   | 2.7                  | 2.1  | 0.19   |
| NRHP                 | URUGUAY                             | 4.2                  | 0.5  | <0.001 | 6.2                | 1.1  | <0.001 | 1.1                  | 0.8  | 0.15   | 2.6                  | 0.5  | <.0001 |
| H3AKDN<br>Enugu      | NIGERIA                             | -                    | -    | -      | -                  | -    | -      | -                    | -    | -      | -                    | -    | -      |
| CKD-REIN             | FRANCE                              | 2.7                  | 1.0  | 0.004  | 5.3                | 1.5  | <0.001 | 0.5                  | 1.0  | 0.61   | 2.8                  | 0.9  | 0.002  |
| RIISC                | UK                                  | -                    | -    | -      | -                  | -    | -      | -                    | -    | -      | -                    | -    | -      |
| BIS                  | GERMANY                             | -                    | -    | -      | -                  | -    | -      | -                    | -    | -      | -                    | -    | -      |
| EQUAL                | EUROPE VARIOUS                      | 2.3                  | 1.2  | 0.05   | 5.5                | 2.5  | 0.03   | 0.0                  | 1.6  | 0.98   | 1.1                  | 1.2  | 0.34   |
| GCKD                 | GERMANY                             | 3.0                  | 0.9  | 0.001  | 3.9                | 1.5  | 0.01   | 0.0                  | 1.0  | 0.99   | 1.4                  | 0.8  | 0.10   |
| CKDopps GER          | GERMANY                             | 2.7                  | 1.0  | 0.01   | 5.6                | 2.0  | 0.01   | -0.6                 | 1.4  | 0.67   | 0.9                  | 1.1  | 0.39   |
| PSI BIND-NL          | NETHERLANDS                         | -                    | -    | -      | -                  | -    | -      | -                    | -    | -      | -                    | -    | -      |
| RRID                 | ENGLAND                             | -                    | -    | -      | -                  | -    | -      | -                    | -    | -      | -                    | -    | -      |
| PROVALID             | EUROPE VARIOUS                      | -                    | -    | -      | -                  | -    | -      | -                    | -    | -      | -                    | -    | -      |
| <b>Meta-Analysis</b> | <b>Pooled Stats [95%CI]</b>         | 3.9 [ 2.8; 5.1]      |      | <.001  | 4.8 [3.9; 5.8]     |      | <.001  | 2.7 [ 0.6; 4.8]      |      | 0.01   | 3.5 [ 2.1; 4.9]      |      | 0.001  |
|                      | <b><math>\chi^2</math>[95% CI]</b>  | 3.0 [0.6; 9.3]       |      |        | 1.1 [0.0; 2.9]     |      |        | 10.6 [4.1; 31.1]     |      |        | 5.3 [1.8; 15.2]      |      |        |
|                      | <b><math>I^2</math>[95% CI]</b>     | 1.7 [0.8; 3.1]       |      |        | 1.0 [0.0; 1.7]     |      |        | 3.3 [2.0; 5.6]       |      |        | 2.3 [1.3; 3.9]       |      |        |
|                      | <b><math>P_{het}</math>[95% CI]</b> | 62.8% [33.8%; 79.1%] |      |        | 0.0% [0.0%; 58.3%] |      |        | 82.6% [72.1%; 89.2%] |      |        | 74.6% [57.9%; 84.7%] |      |        |
|                      | <b>Q test</b>                       | 34.9                 | 13   | 0.001  | 6.5                | 11   | 0.84   | 74.8                 | 13   | <.001  | 55.1                 | 14   | <.001  |

Reference = Diabetic kidney disease

The extended multivariable model included age (continuous), year of study entry, sex, eGFR (per 10 mL increase), sex\*eGFR interaction term, etiology of CKD, diabetes mellitus, coronary artery disease, heart failure, urine ACR (categorical), body mass index (categorical)

Table S8c. Cohort-specific and pooled estimates for the mean difference in hemoglobin according to etiology of CKD using the extended multivariable model for patients without diabetes mellitus.

| Cohort               | Country                        | HTN                  |      |       | PKD                |      |       | GN                   |      |       | Other                |      |       |
|----------------------|--------------------------------|----------------------|------|-------|--------------------|------|-------|----------------------|------|-------|----------------------|------|-------|
|                      |                                | Estimate             | S.E. | p     | Estimate           | S.E. | p     | Estimate             | S.E. | p     | Estimate             | S.E. | p     |
| CORE-CKD             | THAILAND                       | 8.6                  | 1.7  | <.001 | 11.9               | 3.6  | <.001 | 11.7                 | 2.9  | <.001 | 11.7                 | 1.7  | <.001 |
| C-STRIDE             | CHINA                          | -                    | -    | -     | -                  | -    | -     | 10.2                 | 1.2  | <.001 | 10.7                 | 1.2  | <.001 |
| ICKD                 | INDIA                          | 9.7                  | 1.2  | <.001 | 8.2                | 1.8  | <.001 | 7.0                  | 1.0  | <.001 | 7.7                  | 0.8  | <.001 |
| KNOW-CKD             | KOREA                          | 11.3                 | 1.1  | <.001 | 6.6                | 1.6  | <.001 | 10.7                 | 1.1  | <.001 | 7.6                  | 2.0  | <.001 |
| CKD-JAC              | JAPAN                          | 7.6                  | 0.9  | <.001 | -                  | -    | -     | 7.2                  | 0.8  | <.001 | 7.9                  | 1.0  | <.001 |
| CKD.QLD              | AUSTRALIA                      | 6.0                  | 1.4  | <.001 | 3.4                | 2.6  | 0.20  | 2.0                  | 1.6  | 0.21  | 5.1                  | 1.2  | <.001 |
| CanPREDDICT          | CANADA                         | 4.8                  | 0.8  | <.001 | 7.2                | 1.5  | <.001 | 6.5                  | 1.1  | <.001 | 5.8                  | 0.8  | <.001 |
| CRIC                 | US                             | 11.8                 | 0.8  | <.001 | -                  | -    | -     | -                    | -    | -     | 10.8                 | 0.6  | <.001 |
| CKDopps US           | US                             | 5.5                  | 1.2  | <.001 | 8.0                | 3.2  | 0.01  | 2.4                  | 1.9  | 0.21  | 4.8                  | 1.2  | <.001 |
| CKDopps BR           | BRAZIL                         | 4.1                  | 1.7  | 0.01  | 7.2                | 3.3  | 0.03  | 3.2                  | 2.5  | 0.19  | 3.2                  | 1.8  | 0.07  |
| NRHP                 | URUGUAY                        | 5.6                  | 0.4  | <.001 | 7.6                | 1.1  | <.001 | 2.5                  | 0.7  | 0.001 | 4.0                  | 0.4  | <.001 |
| H3AKDN               | NIGERIA                        | -                    | -    | -     | -                  | -    | -     | -                    | -    | -     | -                    | -    | -     |
| Enugu                | NIGERIA                        | -                    | -    | -     | -                  | -    | -     | -                    | -    | -     | -                    | -    | -     |
| CKD-REIN             | FRANCE                         | 5.1                  | 0.9  | <.001 | 7.6                | 1.4  | <.001 | 2.9                  | 1.0  | 0.003 | 5.1                  | 0.8  | <.001 |
| RIISC                | UK                             | -                    | -    | -     | -                  | -    | -     | -                    | -    | -     | -                    | -    | -     |
| CKDBIS               | GERMANY                        | -                    | -    | -     | -                  | -    | -     | -                    | -    | -     | -                    | -    | -     |
| EQUAL                | EUROPE VARIOUS                 | 4.0                  | 1.1  | <.001 | 7.2                | 2.4  | 0.003 | 1.7                  | 1.5  | 0.24  | 2.8                  | 1.1  | 0.01  |
| GCKD                 | GERMANY                        | 5.5                  | 0.8  | <.001 | 6.4                | 1.5  | <.001 | 2.5                  | 1.0  | 0.01  | 3.9                  | 0.8  | <.001 |
| CKDopps GER          | GERMANY                        | 2.4                  | 0.8  | 0.003 | 5.3                | 1.9  | 0.01  | -0.9                 | 1.2  | 0.46  | 0.6                  | 0.9  | 0.51  |
| PSI BIND-NL          | NETHERLANDS                    | -                    | -    | -     | -                  | -    | -     | -                    | -    | -     | -                    | -    | -     |
| RRID                 | ENGLAND                        | -                    | -    | -     | -                  | -    | -     | -                    | -    | -     | -                    | -    | -     |
| PROVALID             | EUROPE VARIOUS                 | -                    | -    | -     | -                  | -    | -     | -                    | -    | -     | -                    | -    | -     |
| <b>Meta-Analysis</b> | <b>Pooled Stats [95%CI]</b>    | 6.5 [4.9; 8.2]       |      | <.001 | 7.1 [6.2; 8.0]     |      | <.001 | 4.9 [ 2.7; 7.1]      |      | <.001 | 6.1 [ 4.3; 7.8]      |      | <.001 |
|                      | <b>I<sup>2</sup>[95% CI]</b>   | 7.0 [3.2; 19.5]      |      |       | 1.2 [0.0; 3.1]     |      |       | 12.6 [5.5; 36.0]     |      |       | 9.1 [4.3; 24.4]      |      |       |
|                      | <b>H<sup>2</sup>[95% CI]</b>   | 2.6 [1.8; 4.4]       |      |       | 1.1 [0.0; 1.8]     |      |       | 3.5 [2.3; 6.0]       |      |       | 3.0 [2.1; 4.9]       |      |       |
|                      | <b>P<sup>adj</sup>[95% CI]</b> | 89.4% [83.9%; 93.0%] |      |       | 0.0% [0.0%; 58.3%] |      |       | 89.1% [83.5%; 92.8%] |      |       | 91.6% [87.8%; 94.2%] |      |       |
|                      | <b>Q test</b>                  | 122.3                | 13   | <.001 | 5.8                | 11   | 0.88  | 119.6                | 13   | <.001 | 166.6                | 14   | <.001 |

Reference = Diabetic kidney disease

The extended multivariable model included age (continuous), year of study entry, sex, eGFR (per 10 mL increase), sex\*eGFR interaction term, etiology of CKD, diabetes mellitus, coronary artery disease, heart failure, urine ACR (categorical), body mass index (categorical)



Table S9. Cohort-specific and pooled estimates for the independent association between covariates and hemoglobin from the extended multivariable model.

| Cohort               | Country                       | Age (per 10-year increase) |      |       | DM       |      |       | CVD                  |      |       | CHF      |      |       |                      |  |  |      |  |  |                    |  |  |       |  |  |
|----------------------|-------------------------------|----------------------------|------|-------|----------|------|-------|----------------------|------|-------|----------|------|-------|----------------------|--|--|------|--|--|--------------------|--|--|-------|--|--|
|                      |                               | Estimate                   | S.E. | p     | Estimate | S.E. | p     | Estimate             | S.E. | p     | Estimate | S.E. | p     |                      |  |  |      |  |  |                    |  |  |       |  |  |
| CORE-CKD             | THAILAND                      | -0.7                       | 0.6  | 0.31  | -3.9     | 1.7  | 0.02  | 0.7                  | 1.7  | 0.67  | -4.5     | 6.1  | 0.46  |                      |  |  |      |  |  |                    |  |  |       |  |  |
| C-STRIDE             | CHINA                         | -1.1                       | 0.3  | <.001 | -1.1     | 1.2  | 0.38  | 2.1                  | 1.3  | 0.10  | 3.5      | 3.4  | 0.29  |                      |  |  |      |  |  |                    |  |  |       |  |  |
| ICKD                 | INDIA                         | -1.3                       | 0.3  | <.001 | -4.7     | 0.9  | <.001 | -2.3                 | 1.0  | 0.02  | -1.9     | 1.2  | 0.13  |                      |  |  |      |  |  |                    |  |  |       |  |  |
| KNOW-CKD             | KOREA                         | 0.1                        | 0.4  | 0.86  | -1.8     | 1.4  | 0.22  | -0.2                 | 1.1  | 0.86  | -1.4     | 2.7  | 0.59  |                      |  |  |      |  |  |                    |  |  |       |  |  |
| CKD-JAC              | JAPAN                         | -1.4                       | 0.3  | <.001 | -1.1     | 0.8  | 0.16  | -0.6                 | 0.7  | 0.38  | -0.6     | 1.4  | 0.65  |                      |  |  |      |  |  |                    |  |  |       |  |  |
| CKD.QLD              | AUSTRALIA                     | -1.4                       | 0.3  | <.001 | -2.8     | 1.0  | 0.01  | -1.5                 | 1.1  | 0.19  | -1.8     | 1.6  | 0.27  |                      |  |  |      |  |  |                    |  |  |       |  |  |
| CanPREDDICT          | CANADA                        | -0.4                       | 0.3  | 0.16  | -3.5     | 0.8  | <.001 | 1.7                  | 0.8  | 0.04  | -2.9     | 0.9  | 0.001 |                      |  |  |      |  |  |                    |  |  |       |  |  |
| CRIC                 | US                            | 0.0                        | 0.3  | 0.86  | -6.6     | 0.6  | <.001 | -0.9                 | 0.5  | 0.10  | -0.6     | 0.8  | 0.44  |                      |  |  |      |  |  |                    |  |  |       |  |  |
| CKDopps US           | US                            | -0.3                       | 0.3  | 0.26  | -2.9     | 0.9  | 0.001 | -2.6                 | 0.9  | 0.003 | -3.3     | 1.0  | 0.002 |                      |  |  |      |  |  |                    |  |  |       |  |  |
| CKDopps BR           | BRAZIL                        | 0.0                        | 0.5  | 0.95  | -0.4     | 1.8  | 0.81  | 0.8                  | 1.6  | 0.63  | -3.1     | 1.8  | 0.09  |                      |  |  |      |  |  |                    |  |  |       |  |  |
| NRHP                 | URUGUAY                       | -0.6                       | 0.1  | <.001 | -1.4     | 0.3  | <.001 | -0.3                 | 0.3  | 0.35  | -1.3     | 0.4  | 0.002 |                      |  |  |      |  |  |                    |  |  |       |  |  |
| H3AKDN<br>Enugu      | NIGERIA                       | -                          | -    | -     | -        | -    | -     | -                    | -    | -     | -        | -    | -     |                      |  |  |      |  |  |                    |  |  |       |  |  |
| CKD-REIN             | FRANCE                        | -0.3                       | 0.2  | 0.25  | -2.3     | 0.7  | 0.001 | -1.5                 | 0.6  | 0.02  | -1.7     | 0.8  | 0.04  |                      |  |  |      |  |  |                    |  |  |       |  |  |
| RIISC                | UK                            | -                          | -    | -     | -        | -    | -     | -                    | -    | -     | -        | -    | -     |                      |  |  |      |  |  |                    |  |  |       |  |  |
| CKDBIS               | GERMANY                       | -                          | -    | -     | -        | -    | -     | -                    | -    | -     | -        | -    | -     |                      |  |  |      |  |  |                    |  |  |       |  |  |
| EQUAL                | EUROPE VARIOUS                | -1.9                       | 0.6  | <.001 | -1.7     | 0.9  | 0.07  | 1.4                  | 0.9  | 0.10  | -0.2     | 1.0  | 0.83  |                      |  |  |      |  |  |                    |  |  |       |  |  |
| GCKD                 | GERMANY                       | 0.4                        | 0.3  | 0.14  | -2.5     | 0.6  | <.001 | -0.4                 | 0.6  | 0.47  | -1.1     | 0.7  | 0.11  |                      |  |  |      |  |  |                    |  |  |       |  |  |
| CKDopps GER          | GERMANY                       | -0.9                       | 0.3  | <.001 | 0.3      | 0.9  | 0.72  | -0.7                 | 0.7  | 0.32  | -0.2     | 0.9  | 0.84  |                      |  |  |      |  |  |                    |  |  |       |  |  |
| PSI BIND-NL          | NETHERLANDS                   | -                          | -    | -     | -        | -    | -     | -                    | -    | -     | -        | -    | -     |                      |  |  |      |  |  |                    |  |  |       |  |  |
| RRID                 | ENGLAND                       | -                          | -    | -     | -        | -    | -     | -                    | -    | -     | -        | -    | -     |                      |  |  |      |  |  |                    |  |  |       |  |  |
| PROVALID             | EUROPE VARIOUS                | -                          | -    | -     | -        | -    | -     | -                    | -    | -     | -        | -    | -     |                      |  |  |      |  |  |                    |  |  |       |  |  |
| <b>Meta-Analysis</b> | <b>Pooled Stats [95%CI]</b>   | -0.6 [-0.99; -0.27]        |      |       | 0.002    |      |       | -2.5 [-3.5; -1.5]    |      |       | <.001    |      |       | -0.4 [-1.1; 0.3]     |  |  | 0.26 |  |  | -1.4 [-2.1; -0.7]  |  |  | 0.001 |  |  |
|                      | <b>r<sup>2</sup> [95% CI]</b> | 0.3 [0.1; 1.0]             |      |       |          |      |       | 2.4 [0.9; 6.8]       |      |       |          |      |       | 1.3 [0.1; 3.8]       |  |  |      |  |  | 1.1 [0.0; 2.4]     |  |  |       |  |  |
|                      | <b>τ [95% CI]</b>             | 0.6 [0.4; 0.9]             |      |       |          |      |       | 1.6 [0.9; 2.6]       |      |       |          |      |       | 1.1 [0.4; 1.9]       |  |  |      |  |  | 1.1 [0.0; 1.6]     |  |  |       |  |  |
|                      | <b>I<sup>2</sup> [95% CI]</b> | 76.6% [61.6%; 85.8%]       |      |       |          |      |       | 83.8% [74.6%; 89.6%] |      |       |          |      |       | 54.7% [19.0%; 74.7%] |  |  |      |  |  | 3.7% [0.0%; 55.3%] |  |  |       |  |  |
|                      | <b>Q test</b>                 | 59.9                       | 14   | <.001 | 86.4     | 14   | <.001 | 30.9                 | 14   | 0.01  | 14.5     | 14   | 0.41  |                      |  |  |      |  |  |                    |  |  |       |  |  |

Reference: No DM

Reference: No CVD

Reference: No CHF

| Cohort               | Country                       | ACR = A3            |      |      | ACR = A2 |      |      | BMI = <18.5        |      |       | BMI = 25 - 29.9 |      |       | BMI = ≥30            |      |       |      |  |  |                     |  |  |       |  |  |                      |  |  |       |  |  |
|----------------------|-------------------------------|---------------------|------|------|----------|------|------|--------------------|------|-------|-----------------|------|-------|----------------------|------|-------|------|--|--|---------------------|--|--|-------|--|--|----------------------|--|--|-------|--|--|
|                      |                               | Estimate            | S.E. | p    | Estimate | S.E. | p    | Estimate           | S.E. | p     | Estimate        | S.E. | p     | Estimate             | S.E. | p     |      |  |  |                     |  |  |       |  |  |                      |  |  |       |  |  |
| CORE-CKD             | THAILAND                      | -1.7                | 1.7  | 0.33 | 0.4      | 1.8  | 0.80 | -13.1              | 4.1  | 0.001 | 5.6             | 1.3  | <.001 | 6.2                  | 1.8  | <.001 |      |  |  |                     |  |  |       |  |  |                      |  |  |       |  |  |
| C-STRIDE             | CHINA                         | 0.2                 | 1.2  | 0.87 | 1.6      | 1.3  | 0.20 | -8.7               | 2.4  | <.001 | 4.8             | 0.9  | <.001 | 9.9                  | 1.7  | <.001 |      |  |  |                     |  |  |       |  |  |                      |  |  |       |  |  |
| ICKD                 | INDIA                         | -0.9                | 0.8  | 0.26 | 1.2      | 0.7  | 0.09 | -7.8               | 1.2  | <.001 | 3.1             | 0.7  | <.001 | 6.7                  | 0.9  | <.001 |      |  |  |                     |  |  |       |  |  |                      |  |  |       |  |  |
| KNOW-CKD             | KOREA                         | -2.7                | 1.5  | 0.07 | 0.0      | 1.5  | 0.99 | -2.1               | 2.5  | 0.39  | 5.3             | 0.8  | <.001 | 9.5                  | 1.6  | <.001 |      |  |  |                     |  |  |       |  |  |                      |  |  |       |  |  |
| CKD-JAC              | JAPAN                         | 1.1                 | 1.1  | 0.30 | 1.9      | 1.1  | 0.11 | -4.5               | 1.2  | <.001 | 5.0             | 0.7  | <.001 | 9.9                  | 1.4  | <.001 |      |  |  |                     |  |  |       |  |  |                      |  |  |       |  |  |
| CKD.QLD              | AUSTRALIA                     | -1.0                | 1.2  | 0.40 | -0.3     | 1.8  | 0.87 | 4.8                | 3.9  | 0.22  | 1.6             | 1.3  | 0.21  | 3.2                  | 1.2  | 0.01  |      |  |  |                     |  |  |       |  |  |                      |  |  |       |  |  |
| CanPREDDICT          | CANADA                        | -1.7                | 0.8  | 0.05 | -1.1     | 0.8  | 0.18 | 8.4                | 4.4  | 0.06  | 3.0             | 1.6  | 0.06  | 2.4                  | 1.5  | 0.12  |      |  |  |                     |  |  |       |  |  |                      |  |  |       |  |  |
| CRIC                 | US                            | -1.4                | 0.7  | 0.06 | 0.0      | 0.7  | 1.00 | -5.7               | 3.3  | 0.08  | 3.1             | 0.8  | <.001 | 3.5                  | 0.7  | <.001 |      |  |  |                     |  |  |       |  |  |                      |  |  |       |  |  |
| CKDopps US           | US                            | -1.8                | 1.3  | 0.16 | -2.7     | 1.5  | 0.08 | -3.6               | 3.7  | 0.33  | 1.4             | 1.3  | 0.28  | 3.8                  | 1.2  | 0.001 |      |  |  |                     |  |  |       |  |  |                      |  |  |       |  |  |
| CKDopps BR           | BRAZIL                        | -2.0                | 2.3  | 0.39 | -0.9     | 2.3  | 0.71 | -10.2              | 7.5  | 0.17  | 3.5             | 1.9  | 0.06  | 4.8                  | 2.0  | 0.02  |      |  |  |                     |  |  |       |  |  |                      |  |  |       |  |  |
| NRHP                 | URUGUAY                       | 1.8                 | 0.8  | 0.02 | -        | -    | -    | -3.5               | 1.6  | 0.03  | 3.1             | 0.4  | <.001 | 4.9                  | 0.4  | <.001 |      |  |  |                     |  |  |       |  |  |                      |  |  |       |  |  |
| H3AKDN<br>Enugu      | NIGERIA                       | -                   | -    | -    | -        | -    | -    | -                  | -    | -     | -               | -    | -     | -                    | -    | -     |      |  |  |                     |  |  |       |  |  |                      |  |  |       |  |  |
| CKD-REIN             | FRANCE                        | -1.0                | 0.8  | 0.18 | 0.0      | 0.8  | 0.96 | -1.0               | 2.3  | 0.67  | 3.6             | 0.7  | <.001 | 4.3                  | 0.8  | <.001 |      |  |  |                     |  |  |       |  |  |                      |  |  |       |  |  |
| RIISC                | UK                            | -                   | -    | -    | -        | -    | -    | -                  | -    | -     | -               | -    | -     | -                    | -    | -     |      |  |  |                     |  |  |       |  |  |                      |  |  |       |  |  |
| CKDBIS               | GERMANY                       | -                   | -    | -    | -        | -    | -    | -                  | -    | -     | -               | -    | -     | -                    | -    | -     |      |  |  |                     |  |  |       |  |  |                      |  |  |       |  |  |
| EQUAL                | EUROPE VARIOUS                | 0.5                 | 1.2  | 0.68 | -        | -    | -    | 0.9                | 3.4  | 0.78  | 2.6             | 0.9  | 0.01  | 3.5                  | 1.0  | <.001 |      |  |  |                     |  |  |       |  |  |                      |  |  |       |  |  |
| GCKD                 | GERMANY                       | 0.1                 | 0.7  | 0.89 | 0.7      | 0.6  | 0.29 | -6.4               | 3.7  | 0.09  | 3.6             | 0.7  | <.001 | 4.7                  | 0.7  | <.001 |      |  |  |                     |  |  |       |  |  |                      |  |  |       |  |  |
| CKDopps GER          | GERMANY                       | -0.2                | 1.1  | 0.89 | 0.1      | 1.1  | 0.96 | -6.5               | 3.0  | 0.03  | 2.3             | 0.8  | 0.004 | 3.9                  | 0.8  | <.001 |      |  |  |                     |  |  |       |  |  |                      |  |  |       |  |  |
| PSI BIND-NL          | NETHERLANDS                   | -                   | -    | -    | -        | -    | -    | -                  | -    | -     | -               | -    | -     | -                    | -    | -     |      |  |  |                     |  |  |       |  |  |                      |  |  |       |  |  |
| RRID                 | ENGLAND                       | -                   | -    | -    | -        | -    | -    | -                  | -    | -     | -               | -    | -     | -                    | -    | -     |      |  |  |                     |  |  |       |  |  |                      |  |  |       |  |  |
| PROVALID             | EUROPE VARIOUS                | -                   | -    | -    | -        | -    | -    | -                  | -    | -     | -               | -    | -     | -                    | -    | -     |      |  |  |                     |  |  |       |  |  |                      |  |  |       |  |  |
| <b>Meta-Analysis</b> | <b>Pooled Stats [95%CI]</b>   | -0.5 [-1.2; 0.1]    |      |      | 0.11     |      |      | 0.2 [-0.5; 0.9]    |      |       | 0.50            |      |       | -3.9 [-6.8; -1.1]    |      |       | 0.01 |  |  | 3.5 [2.8; 4.1]      |  |  | <.001 |  |  | 5.2 [3.9; 6.6]       |  |  | <.001 |  |  |
|                      | <b>τ<sup>2</sup> [95% CI]</b> | 0.9 [0.0; 2.6]      |      |      |          |      |      | 0.6 [0.0; 2.2]     |      |       |                 |      |       | 20.1 [2.9; 60.8]     |      |       |      |  |  | 0.9 [0.0; 2.8]      |  |  |       |  |  | 4.6 [1.4; 13.5]      |  |  |       |  |  |
|                      | <b>τ [95% CI]</b>             | 0.9 [0.0; 1.6]      |      |      |          |      |      | 0.8 [0.0; 1.5]     |      |       |                 |      |       | 4.5 [1.7; 7.8]       |      |       |      |  |  | 0.9 [0.0; 1.7]      |  |  |       |  |  | 2.2 [1.2; 3.7]       |  |  |       |  |  |
|                      | <b>I<sup>2</sup> [95% CI]</b> | 34.0% [0.0%; 64.5%] |      |      |          |      |      | 3.8% [0.0%; 58.2%] |      |       |                 |      |       | 62.3% [34.2%; 78.5%] |      |       |      |  |  | 39.1% [0.0%; 67.0%] |  |  |       |  |  | 70.2% [49.5%; 82.4%] |  |  |       |  |  |
|                      | <b>Q test</b>                 | 21.2                | 14   | 0.10 | 12.5     | 12   | 0.41 | 37.2               | 14   | 0.001 | 23.0            | 14   | 0.06  | 47.0                 | 14   | <.001 |      |  |  |                     |  |  |       |  |  |                      |  |  |       |  |  |

Reference: ACR A1 category

Reference: BMI 18.5-24.9

The extended multivariable model included age (continuous), year of study entry, sex, eGFR (per 10 mL increase), sex\*eGFR interaction term, etiology of CKD, diabetes mellitus, coronary artery disease, heart failure, urine ACR (categorical), body mass index (categorical)

Table S10. R-squared values for linear regression models applied in participating cohorts.

| <b>Cohort</b> | <b>Core Model</b>     | <b>Extended MV Model</b> |
|---------------|-----------------------|--------------------------|
| CORE-CKD      | 18.1%                 | 23.7%                    |
| C-STRIDE      | 30.0%                 | 35.1%                    |
| ICKD          | 14.1%                 | 21.0%                    |
| KNOW-CKD      | 35.6%                 | 44.3%                    |
| CKD-JAC       | 32.0%                 | 36.9%                    |
| CKD.QLD       | 19.7%                 | 22.1%                    |
| CanPREDICT    | 11.1%                 | 14.5%                    |
| CRIC          | 17.2%                 | 24.9%                    |
| CKDopps US    | 17.6%                 | 20.6%                    |
| CKDopps BR    | 28.2%                 | 30.6%                    |
| NRHP          | 18.7%                 | 20.4%                    |
| CKD-REIN      | 18.3%                 | 21.5%                    |
| EQUAL         | 4.7%                  | 6.9%                     |
| GCKD          | 13.0%                 | 15.3%                    |
| CKDopps GER   | 13.8%                 | 15.7%                    |
| <b>Range</b>  | <b>[4.7% - 35.6%]</b> | <b>[6.9% - 44.3%]</b>    |
| <b>Median</b> | <b>18.1%</b>          | <b>21.5%</b>             |

The extended multivariable model included age (continuous), year of study entry, sex, eGFR (per 10 mL increase), sex\*eGFR interaction term, etiology of CKD, diabetes mellitus, coronary artery disease, heart failure, urine ACR (categorical), body mass index (categorical)

Table S11. Cohort-specific and pooled estimates for the independent association between smoking status and hemoglobin

| Cohort               | Country                             | Current Smoker       |      |       | Former Smoker        |      |       |
|----------------------|-------------------------------------|----------------------|------|-------|----------------------|------|-------|
|                      |                                     | Estimate             | S.E. | p     | Estimate             | S.E. | p     |
| CORE-CKD             | THAILAND                            | -0.1                 | 2.5  | 0.96  | 0.5                  | 1.5  | 0.75  |
| C-STRIDE             | CHINA                               | 0.8                  | 1.0  | 0.43  | -                    | -    | -     |
| ICKD                 | INDIA                               | -0.3                 | 0.8  | 0.72  | 2.0                  | 0.9  | 0.03  |
| KNOW-CKD             | KOREA                               | 1.1                  | 1.3  | 0.43  | -2.5                 | 1.1  | 0.03  |
| CKD-JAC              | JAPAN                               | 4.3                  | 0.9  | <.001 | 2.1                  | 0.8  | 0.01  |
| CKD.QLD              | AUSTRALIA                           | 3.3                  | 1.6  | 0.04  | 1.7                  | 1.0  | 0.10  |
| CanPREDDICT          | CANADA                              | -                    | -    | -     | -                    | -    | -     |
| CRIC                 | US                                  | 3.0                  | 0.7  | <.001 | -                    | -    | -     |
| CKDopps US           | US                                  | -                    | -    | -     | -                    | -    | -     |
| CKDopps BR           | BRAZIL                              | -                    | -    | -     | -                    | -    | -     |
| NRHP                 | URUGUAY                             | 3.3                  | 0.5  | <.001 | -                    | -    | -     |
| H3AKDN               | NIGERIA                             | -                    | -    | -     | -                    | -    | -     |
| Enugu                | NIGERIA                             | -                    | -    | -     | -                    | -    | -     |
| CKD-REIN             | FRANCE                              | 2.5                  | 0.9  | 0.01  | -0.2                 | 0.6  | 0.81  |
| RIISC                | UK                                  | -                    | -    | -     | -                    | -    | -     |
| CKDBIS               | GERMANY                             | -                    | -    | -     | -                    | -    | -     |
| EQUAL                | EUROPE VARIOUS                      | 0.6                  | 1.5  | 0.71  | -1.4                 | 0.9  | 0.11  |
| GCKD                 | GERMANY                             | 2.4                  | 0.8  | 0.003 | -1.5                 | 0.6  | 0.01  |
| CKDopps GER          | GERMANY                             | -                    | -    | -     | -                    | -    | -     |
| PSI BIND-NL          | NETHERLANDS                         | -                    | -    | -     | -                    | -    | -     |
| RRID                 | ENGLAND                             | -                    | -    | -     | -                    | -    | -     |
| PROVALID             | EUROPE VARIOUS                      | -                    | -    | -     | -                    | -    | -     |
| <b>Meta-analysis</b> | <b>Pooled Stats [95%CI]</b>         | 2.1 [ 1.1; 3.1]      |      | 0.001 | 0.1 [-1.4; 1.5]      |      | 0.92  |
|                      | <b><math>\tau^2</math> [95% CI]</b> | 1.5 [0.2; 5.8]       |      |       | 2.4 [0.6; 12.0]      |      |       |
|                      | <b><math>\tau</math> [95% CI]</b>   | 1.2 [0.4; 2.4]       |      |       | 1.5 [0.8; 3.5]       |      |       |
|                      | <b><math>I^2</math> [95% CI]</b>    | 61.1% [24.8%; 79.9%] |      |       | 76.2% [52.5%; 88.1%] |      |       |
|                      | <b>Q test</b>                       | 25.7                 | 10   | 0.004 | 29.4                 | 7    | <.001 |

Notes:

Addition of smoking status to the extended multivariable model

Reference: Never Smoker

The extended multivariable model included age (continuous), year of study entry, sex, eGFR (per 10 mL increase), sex\*eGFR interaction term, etiology of CKD, diabetes mellitus, coronary artery disease, heart failure, urine ACR (categorical), body mass index (categorical)

Table S12. Cohort-specific and pooled estimates for the independent association between altitude and hemoglobin

| Cohort               | Country                             | Altitude 500 – 1000m |      |       | Altitude >=1000m |                     |       |      |
|----------------------|-------------------------------------|----------------------|------|-------|------------------|---------------------|-------|------|
|                      |                                     | Estimate             | S.E. | p     | Estimate         | S.E.                | p     |      |
| CORE-CKD             | THAILAND                            | -7.6                 | 4.3  | 0.08  | -                | -                   | -     |      |
| C-STRIDE             | CHINA                               | 1.0                  | 1.4  | 0.47  | 4.6              | 0.9                 | <.001 |      |
| ICKD                 | INDIA                               | -4.8                 | 0.7  | <.001 | 9.8              | 2.1                 | <.001 |      |
| KNOW-CKD             | KOREA                               | -                    | -    | -     | -                | -                   | -     |      |
| CKD-JAC              | JAPAN                               | 0.8                  | 1.5  | 0.58  | -                | -                   | -     |      |
| CKD.QLD              | AUSTRALIA                           | 2.0                  | 1.0  | 0.04  | -                | -                   | -     |      |
| CanPREDDICT          | CANADA                              | 0.6                  | 1.5  | 0.69  | 2.6              | 2.1                 | 0.23  |      |
| CRIC                 | US                                  | -                    | -    | -     | -                | -                   | -     |      |
| CKDopps US           | US                                  | -                    | -    | -     | -                | -                   | -     |      |
| CKDopps BR           | BRAZIL                              | -                    | -    | -     | -                | -                   | -     |      |
| NRHP                 | URUGUAY                             | -                    | -    | -     | -                | -                   | -     |      |
| H3AKDN               | NIGERIA                             | -                    | -    | -     | -                | -                   | -     |      |
| Enugu                | NIGERIA                             | -                    | -    | -     | -                | -                   | -     |      |
| CKD-REIN             | FRANCE                              | 1.2                  | 1.5  | 0.44  | 4.9              | 4.5                 | 0.27  |      |
| RIISC                | UK                                  | -                    | -    | -     | -                | -                   | -     |      |
| CKDBIS               | GERMANY                             | -                    | -    | -     | -                | -                   | -     |      |
| EQUAL                | EUROPE VARIOUS                      | -                    | -    | -     | -                | -                   | -     |      |
| GCKD                 | GERMANY                             | 1.1                  | 0.9  | 0.19  | -                | -                   | -     |      |
| CKDopps GER          | GERMANY                             | -                    | -    | -     | -                | -                   | -     |      |
| PSI BIND-NL          | NETHERLANDS                         | -                    | -    | -     | -                | -                   | -     |      |
| RRID                 | ENGLAND                             | -                    | -    | -     | -                | -                   | -     |      |
| PROVALID             | EUROPE VARIOUS                      | -                    | -    | -     | -                | -                   | -     |      |
| <b>Meta-analysis</b> | <b>Pooled Stats [95%CI]</b>         | -0.2 [-2.6; 2.3]     |      |       | 0.87             | 5.4 [ 0.5; 10.4]    |       | 0.04 |
|                      | <b><math>\tau^2</math> [95% CI]</b> | 7.3 [1.8; 41.6]      |      |       |                  | 5.8 [0; >100]       |       |      |
|                      | <b><math>\tau</math> [95% CI]</b>   | 2.7 [1.3; 6.5]       |      |       |                  | 2.4 [0; >10]        |       |      |
|                      | <b><math>I^2</math> [95% CI]</b>    | 87.5% [77.6%; 93.0%] |      |       |                  | 54.4% [0.0%; 84.9%] |       |      |
|                      | <b>Q test</b>                       | 56.0                 | 7    | <.001 | 6.6              | 3                   | 0.09  |      |

Notes:

Addition of altitude to the extended multivariable model

Reference: Altitude=<500m

The extended multivariable model included age (continuous), year of study entry, sex, eGFR (per 10 mL increase), sex\*eGFR interaction term, etiology of CKD, diabetes mellitus, coronary artery disease, heart failure, urine ACR (categorical), body mass index (categorical)

Table S13. Cohort-specific and pooled estimates for the independent association between use of RAAS inhibitors and hemoglobin

| Cohort               | Country                             | RAASi use            |      |       |
|----------------------|-------------------------------------|----------------------|------|-------|
|                      |                                     | Estimate             | S.E. | p     |
| CORE-CKD             | THAILAND                            | 0.8                  | 1.3  | 0.51  |
| C-STRIDE             | CHINA                               | 2.7                  | 0.8  | <.001 |
| ICKD                 | INDIA                               | 2.2                  | 0.6  | <.001 |
| KNOW-CKD             | KOREA                               | -0.3                 | 1.1  | 0.80  |
| CKD-JAC              | JAPAN                               | -2.5                 | 0.8  | 0.001 |
| CKD.QLD              | AUSTRALIA                           | -2.0                 | 2.5  | 0.43  |
| CanPREDDICT          | CANADA                              | -0.3                 | 0.8  | 0.71  |
| CRIC                 | US                                  | -1.7                 | 0.5  | 0.002 |
| CKDopps US           | US                                  | -                    | -    | -     |
| CKDopps BR           | BRAZIL                              | -                    | -    | -     |
| NRHP                 | URUGUAY                             | 0.6                  | 0.3  | 0.03  |
| H3AKDN<br>Enugu      | NIGERIA                             | -                    | -    | -     |
| CKD-REIN             | FRANCE                              | -1.0                 | 0.7  | 0.13  |
| RIISC                | UK                                  | -                    | -    | -     |
| CKDBIS               | GERMANY                             | -                    | -    | -     |
| EQUAL                | EUROPE VARIOUS                      | 0.1                  | 0.7  | 0.90  |
| GCKD                 | GERMANY                             | 5.3                  | 3.9  | 0.18  |
| CKDopps GER          | GERMANY                             | -                    | -    | -     |
| PSI BIND-NL          | NETHERLANDS                         | -                    | -    | -     |
| RRID                 | ENGLAND                             | -                    | -    | -     |
| PROVALID             | EUROPE VARIOUS                      | -                    | -    | -     |
|                      | <b>Pooled Stats [95%CI]</b>         | 0.07 [-1.1; 1.2]     |      | 0.89  |
| <b>Meta-analysis</b> | <b><math>\tau^2</math> [95% CI]</b> | 2.6 [0.7; 9.2]       |      |       |
|                      | <b><math>\tau</math> [95% CI]</b>   | 1.6 [0.8; 3.0]       |      |       |
|                      | <b><math>I^2</math> [95% CI]</b>    | 79.7% [65.4%; 88.1%] |      |       |
|                      | <b>Q test</b>                       | 54.3                 | 11   | <.001 |

Notes:

Addition of RAASi use to the extended multivariable model

Reference: No RAASi

The extended multivariable model included age (continuous), year of study entry, sex, eGFR (per 10 mL increase), sex\*eGFR interaction term, etiology of CKD, diabetes mellitus, coronary artery disease, heart failure, urine ACR (categorical), body mass index (categorical)

Table S14a. Cohort-specific and pooled estimates for the mean difference in hemoglobin in women compared to men at an eGFR value of 15mL/min per 1.73m<sup>2</sup> in ESA-unexposed subgroup.

| Cohort               | Country                             | Core Model           |      |         | Extended MV Model |                      |         |         |
|----------------------|-------------------------------------|----------------------|------|---------|-------------------|----------------------|---------|---------|
|                      |                                     | Estimate             | S.E. | p       | Estimate          | S.E.                 | p       |         |
| CORE-CKD             | THAILAND                            | -12.5                | 2.8  | <.001   | -11.8             | 2.8                  | <.001   |         |
| C-STRIDE             | CHINA                               | -10.3                | 1.5  | <.001   | -10.1             | 1.5                  | <.001   |         |
| ICKD                 | INDIA                               | -9.3                 | 1.8  | <.001   | -9.9              | 1.8                  | <.001   |         |
| KNOW-CKD             | KOREA                               | -5.4                 | 1.7  | 0.001   | -7.5              | 1.6                  | <.001   |         |
| CKD-JAC              | JAPAN                               | -7.0                 | 1.2  | <.001   | -7.1              | 1.2                  | <.001   |         |
| CKD.QLD              | AUSTRALIA                           | -2.7                 | 1.4  | 0.05    | -3.0              | 1.4                  | 0.03    |         |
| CanPREDDICT          | CANADA                              | -5.2                 | 1.3  | <.001   | -5.9              | 1.3                  | <.001   |         |
| CRIC                 | US                                  | -8.3                 | 1.4  | <.001   | -8.1              | 1.3                  | <.001   |         |
| CKDopps US           | US                                  | -7.6                 | 1.1  | <.001   | -7.8              | 1.1                  | <.001   |         |
| CKDopps BR           | BRAZIL                              | -5.9                 | 1.8  | 0.001   | -6.2              | 1.8                  | 0.001   |         |
| NRHP                 | URUGUAY                             | -5.7                 | 0.5  | <.001   | -6.0              | 0.5                  | <.001   |         |
| H3AKDN Enugu         | NIGERIA                             | 2.9                  | 2.5  | 0.25    | -                 | -                    | -       |         |
| CKD-REIN             | FRANCE                              | -6.7                 | 1.1  | <.001   | -7.2              | 1.1                  | <.001   |         |
| RIISC                | UK                                  | -3.9                 | 2.3  | 0.10    | -                 | -                    | -       |         |
| CKDBIS               | GERMANY                             | 3.8                  | 3.0  | 0.21    | -                 | -                    | -       |         |
| EQUAL                | EUROPE VARIOUS                      | -2.1                 | 1.0  | 0.04    | -1.8              | 1.1                  | 0.09    |         |
| GCKD                 | GERMANY                             | -9.1                 | 1.5  | <.001   | -8.8              | 1.5                  | <.001   |         |
| CKDopps GER          | GERMANY                             | -4.7                 | 1.0  | <.001   | -4.9              | 1.0                  | <.001   |         |
| PSI BIND-NL          | NETHERLANDS                         | -                    | -    | -       | -                 | -                    | -       |         |
| RRID                 | ENGLAND                             | -3.4                 | 3.2  | 0.28    | -                 | -                    | -       |         |
| PROVALID             | EUROPE VARIOUS                      | -3.4                 | 4.0  | 0.39    | -                 | -                    | -       |         |
|                      | <b>Pooled Stats [95%CI]</b>         | -5.6 [-7.3; -3.8]    |      |         | < 0.001           | -6.8 [-8.2; -5.4]    |         | < 0.001 |
|                      | <b><math>\tau^2</math> [95% CI]</b> | 11.5 [3.9; 27.9]     |      |         |                   | 4.9 [1.4; 14.4]      |         |         |
| <b>Meta-analysis</b> | <b><math>\tau</math> [95% CI]</b>   | 3.4 [1.9; 5.3]       |      |         |                   | 2.2 [1.2; 3.8]       |         |         |
|                      | <b>I<sup>2</sup> [95% CI]</b>       | 73.8% [59.3%; 83.1%] |      |         |                   | 71.3% [51.7%; 83.0%] |         |         |
|                      | <b>Q test</b>                       | 72.5                 | 19   | < 0.001 | 48.9              | 14                   | < 0.001 |         |

The extended multivariable model included age (continuous), year of study entry, sex, eGFR (per 10 mL increase), sex\*eGFR interaction term, etiology of CKD, diabetes mellitus, coronary artery disease, heart failure, urine ACR (categorical), body mass index (categorical)

Table S14b. Cohort-specific and pooled estimates for the mean difference in hemoglobin in women compared to men at an eGFR value of 30mL/min per 1.73m<sup>2</sup> in ESA-unexposed subgroup.

| Cohort               | Country                       | Core Model           |      |         | Extended MV Model |      |         |                      |         |
|----------------------|-------------------------------|----------------------|------|---------|-------------------|------|---------|----------------------|---------|
|                      |                               | Estimate             | S.E. | p       | Estimate          | S.E. | p       |                      |         |
| CORE-CKD             | THAILAND                      | -13.8                | 1.5  | <.001   | -13.1             | 1.5  | <.001   |                      |         |
| C-STRIDE             | CHINA                         | -13.1                | 0.9  | <.001   | -12.8             | 0.9  | <.001   |                      |         |
| ICKD                 | INDIA                         | -10.9                | 0.9  | <.001   | -11.7             | 0.9  | <.001   |                      |         |
| KNOW-CKD             | KOREA                         | -10.9                | 1.0  | <.001   | -12.0             | 1.0  | <.001   |                      |         |
| CKD-JAC              | JAPAN                         | -10.1                | 0.7  | <.001   | -10.0             | 0.7  | <.001   |                      |         |
| CKD.QLD              | AUSTRALIA                     | -5.8                 | 0.9  | <.001   | -6.1              | 0.9  | <.001   |                      |         |
| CanPREDDICT          | CANADA                        | -6.8                 | 0.7  | <.001   | -7.4              | 0.7  | <.001   |                      |         |
| CRIC                 | US                            | -9.8                 | 0.8  | <.001   | -10.0             | 0.7  | <.001   |                      |         |
| CKDopps US           | US                            | -8.9                 | 0.8  | <.001   | -9.0              | 0.8  | <.001   |                      |         |
| CKDopps BR           | BRAZIL                        | -11.2                | 1.3  | <.001   | -11.0             | 1.4  | <.001   |                      |         |
| NRHP                 | URUGUAY                       | -7.7                 | 0.3  | <.001   | -8.0              | 0.3  | <.001   |                      |         |
| H3AKDN Enugu         | NIGERIA                       | 0.1                  | 2.3  | 0.96    | -                 | -    | -       |                      |         |
| CKD-REIN             | FRANCE                        | -8.7                 | 0.6  | <.001   | -9.2              | 0.6  | <.001   |                      |         |
| RIISC                | UK                            | -10.4                | 1.3  | <.001   | -                 | -    | -       |                      |         |
| CKDBIS               | GERMANY                       | -0.3                 | 1.7  | 0.88    | -                 | -    | -       |                      |         |
| EQUAL                | EUROPE VARIOUS                | -2.2                 | 2.1  | 0.30    | -2.4              | 2.2  | 0.26    |                      |         |
| GCKD                 | GERMANY                       | -9.8                 | 0.8  | <.001   | -9.7              | 0.8  | <.001   |                      |         |
| CKDopps GER          | GERMANY                       | -6.6                 | 0.7  | <.001   | -6.8              | 0.7  | <.001   |                      |         |
| PSI BIND-NL          | NETHERLANDS                   | -                    | -    | -       | -                 | -    | -       |                      |         |
| RRID                 | ENGLAND                       | -6.0                 | 1.8  | 0.001   | -                 | -    | -       |                      |         |
| PROVALID             | EUROPE VARIOUS                | -5.3                 | 2.3  | 0.02    | -                 | -    | -       |                      |         |
|                      | <b>Pooled Stats [95%CI]</b>   | -8.1 [-9.9; -6.4]    |      |         | < 0.001           |      |         | -9.4 [-10.8; -7.9]   | < 0.001 |
|                      | <b>τ<sup>2</sup> [95% CI]</b> | 12.4 [5.8; 28.9]     |      |         |                   |      |         | 6.2 [2.4; 17.6]      |         |
| <b>Meta-analysis</b> | <b>τ [95% CI]</b>             | 3.5 [2.4; 5.4]       |      |         |                   |      |         | 2.5 [1.5; 4.2]       |         |
|                      | <b>I<sup>2</sup> [95% CI]</b> | 87.2% [81.6%; 91.1%] |      |         |                   |      |         | 85.5% [77.6%; 90.6%] |         |
|                      | <b>Q test</b>                 | 148.1                | 19   | < 0.001 | 96.5              | 14   | < 0.001 |                      |         |

The extended multivariable model included age (continuous), year of study entry, sex, eGFR (per 10 mL increase), sex\*eGFR interaction term, etiology of CKD, diabetes mellitus, coronary artery disease, heart failure, urine ACR (categorical), body mass index (categorical)



Table S14c. Cohort-specific and pooled estimates for the mean difference in hemoglobin in women compared to men at an eGFR value of 45mL/min per 1.73m<sup>2</sup> in ESA-unexposed subgroup.

| Cohort               | Country                             | Core Model           |      |         | Extended MV Model |                      |         |         |
|----------------------|-------------------------------------|----------------------|------|---------|-------------------|----------------------|---------|---------|
|                      |                                     | Estimate             | S.E. | p       | Estimate          | S.E.                 | p       |         |
| CORE-CKD             | THAILAND                            | -15.1                | 1.7  | <.001   | -14.3             | 1.7                  | <.001   |         |
| C-STRIDE             | CHINA                               | -16.0                | 1.1  | <.001   | -15.5             | 1.1                  | <.001   |         |
| ICKD                 | INDIA                               | -12.5                | 0.8  | <.001   | -13.5             | 0.8                  | <.001   |         |
| KNOW-CKD             | KOREA                               | -16.4                | 1.1  | <.001   | -16.4             | 1.1                  | <.001   |         |
| CKD-JAC              | JAPAN                               | -13.3                | 0.8  | <.001   | -12.9             | 0.8                  | <.001   |         |
| CKD.QLD              | AUSTRALIA                           | -8.8                 | 1.2  | <.001   | -9.2              | 1.2                  | <.001   |         |
| CanPREDDICT          | CANADA                              | -8.4                 | 1.5  | <.001   | -8.8              | 1.5                  | <.001   |         |
| CRIC                 | US                                  | -11.2                | 0.5  | <.001   | -11.9             | 0.5                  | <.001   |         |
| CKDopps US           | US                                  | -10.2                | 1.5  | <.001   | -10.3             | 1.5                  | <.001   |         |
| CKDopps BR           | BRAZIL                              | -16.5                | 2.4  | <.001   | -15.9             | 2.4                  | <.001   |         |
| NRHP                 | URUGUAY                             | -9.8                 | 0.3  | <.001   | -10.1             | 0.3                  | <.001   |         |
| H3AKDN Enugu         | NIGERIA                             | -2.7                 | 3.4  | 0.43    | -                 | -                    | -       |         |
| CKD-REIN             | FRANCE                              | -10.8                | 0.9  | <.001   | -11.2             | 0.9                  | <.001   |         |
| RIISC                | UK                                  | -16.8                | 1.8  | <.001   | -                 | -                    | -       |         |
| CKDBIS               | GERMANY                             | -4.3                 | 1.0  | <.001   | -                 | -                    | -       |         |
| EQUAL                | EUROPE VARIOUS                      | -2.2                 | 4.5  | 0.62    | -3.0              | 4.6                  | 0.51    |         |
| GCKD                 | GERMANY                             | -10.6                | 0.5  | <.001   | -10.5             | 0.6                  | <.001   |         |
| CKDopps GER          | GERMANY                             | -8.5                 | 1.5  | <.001   | -8.7              | 1.5                  | <.001   |         |
| PSI BIND-NL          | NETHERLANDS                         | -                    | -    | -       | -                 | -                    | -       |         |
| RRID                 | ENGLAND                             | -8.6                 | 0.8  | <.001   | -                 | -                    | -       |         |
| PROVALID             | EUROPE VARIOUS                      | -7.2                 | 1.3  | <.001   | -                 | -                    | -       |         |
|                      | <b>Pooled Stats [95%CI]</b>         | -10.8 [-12.7; -8.9]  |      |         | < 0.001           | -11.8 [-13.4; -10.2] |         | < 0.001 |
| <b>Meta-analysis</b> | <b><math>\tau^2</math> [95% CI]</b> | 14.8 [6.7; 35.2]     |      |         |                   | 7.7 [2.4; 22.5]      |         |         |
|                      | <b><math>\tau</math> [95% CI]</b>   | 3.9 [2.6; 5.9]       |      |         |                   | 2.8 [1.5; 4.7]       |         |         |
|                      | <b><math>I^2</math> [95% CI]</b>    | 88.7% [84.0%; 92.0%] |      |         |                   | 83.7% [74.5%; 89.6%] |         |         |
|                      | <b>Q test</b>                       | 168.4                | 19   | < 0.001 | 85.9              | 14                   | < 0.001 |         |

The extended multivariable model included age (continuous), year of study entry, sex, eGFR (per 10 mL increase), sex\*eGFR interaction term, etiology of CKD, diabetes mellitus, coronary artery disease, heart failure, urine ACR (categorical), body mass index (categorical)

Table S14d. Cohort-specific and pooled estimates for the mean difference in hemoglobin in women compared to men at an eGFR value of 60mL/min per 1.73m<sup>2</sup> in ESA-unexposed subgroup.

| Cohort               | Country                             | Core Model           |      |         | Extended MV Model |                      |         |         |
|----------------------|-------------------------------------|----------------------|------|---------|-------------------|----------------------|---------|---------|
|                      |                                     | Estimate             | S.E. | p       | Estimate          | S.E.                 | p       |         |
| CORE-CKD             | THAILAND                            | -16.4                | 3.1  | <.001   | -15.6             | 3.0                  | <.001   |         |
| C-STRIDE             | CHINA                               | -18.8                | 1.9  | <.001   | -18.2             | 1.8                  | <.001   |         |
| ICKD                 | INDIA                               | -14.1                | 1.6  | <.001   | -15.3             | 1.6                  | <.001   |         |
| KNOW-CKD             | KOREA                               | -21.9                | 2.0  | <.001   | -20.9             | 1.9                  | <.001   |         |
| CKD-JAC              | JAPAN                               | -16.4                | 1.4  | <.001   | -15.8             | 1.3                  | <.001   |         |
| CKD.QLD              | AUSTRALIA                           | -11.9                | 2.0  | <.001   | -12.3             | 2.0                  | <.001   |         |
| CanPREDDICT          | CANADA                              | -10.0                | 2.6  | <.001   | -10.3             | 2.6                  | <.001   |         |
| CRIC                 | US                                  | -12.7                | 1.0  | <.001   | -13.9             | 0.9                  | <.001   |         |
| CKDopps US           | US                                  | -11.5                | 2.5  | <.001   | -11.6             | 2.5                  | <.001   |         |
| CKDopps BR           | BRAZIL                              | -21.8                | 3.8  | <.001   | -20.8             | 3.9                  | <.001   |         |
| NRHP                 | URUGUAY                             | -11.8                | 0.6  | <.001   | -12.2             | 0.6                  | <.001   |         |
| H3AKDN Enugu         | NIGERIA                             | -5.5                 | 5.2  | 0.29    | -                 | -                    | -       |         |
| CKD-REIN             | FRANCE                              | -12.8                | 1.6  | <.001   | -13.2             | 1.6                  | <.001   |         |
| RIISC                | UK                                  | -23.3                | 3.3  | <.001   | -                 | -                    | -       |         |
| CKDBIS               | GERMANY                             | -8.4                 | 1.8  | <.001   | -                 | -                    | -       |         |
| EQUAL                | EUROPE VARIOUS                      | -2.3                 | 6.9  | 0.74    | -3.7              | 7.0                  | 0.60    |         |
| GCKD                 | GERMANY                             | -11.3                | 1.1  | <.001   | -11.4             | 1.1                  | <.001   |         |
| CKDopps GER          | GERMANY                             | -10.5                | 2.5  | <.001   | -10.6             | 2.5                  | <.001   |         |
| PSI BIND-NL          | NETHERLANDS                         | -                    | -    | -       | -                 | -                    | -       |         |
| RRID                 | ENGLAND                             | -11.3                | 1.4  | <.001   | -                 | -                    | -       |         |
| PROVALID             | EUROPE VARIOUS                      | -9.0                 | 2.1  | <.001   | -                 | -                    | -       |         |
|                      | <b>Pooled Stats [95%CI]</b>         | -13.4 [-15.6; -11.2] |      |         | < 0.001           | -14.1 [-16.0; -12.1] |         | < 0.001 |
| <b>Meta-analysis</b> | <b><math>\tau^2</math> [95% CI]</b> | 19.6 [6.5; 47.4]     |      |         |                   | 10.7 [2.03; 31.4]    |         |         |
|                      | <b><math>\tau</math> [95% CI]</b>   | 4.4 [2.5; 6.9]       |      |         |                   | 3.3 [1.4; 5.6]       |         |         |
|                      | <b><math>I^2</math> [95% CI]</b>    | 76.0% [63.1%; 84.4%] |      |         |                   | 69.5% [48.1%; 82.0%] |         |         |
|                      | <b>Q test</b>                       | 79.3                 | 19   | < 0.001 | 45.8              | 14                   | < 0.001 |         |

The extended multivariable model included age (continuous), year of study entry, sex, eGFR (per 10 mL increase), sex\*eGFR interaction term, etiology of CKD, diabetes mellitus, coronary artery disease, heart failure, urine ACR (categorical), body mass index (categorical)

Table S15a. Cohort-specific and pooled estimates for the mean difference in hemoglobin according to etiology of CKD using an unadjusted model in ESA-unexposed subgroup.

| Cohort               | Country                             | HTN                  |      |         | PKD                 |      |         | GN                   |      |         | Other            |      |         |
|----------------------|-------------------------------------|----------------------|------|---------|---------------------|------|---------|----------------------|------|---------|------------------|------|---------|
|                      |                                     | Estimate             | S.E. | p       | Estimate            | S.E. | p       | Estimate             | S.E. | p       | Estimate         | S.E. | p       |
| CORE-CKD             | THAILAND                            | 10.0                 | 1.7  | <0.001  | 9.7                 | 3.9  | 0.01    | 9.0                  | 3.0  | 0.003   | 13.4             | 1.6  | <0.001  |
| C-STRIDE             | CHINA                               | -                    | -    | -       | -                   | -    | -       | 12.0                 | 1.4  | <0.001  | 12.7             | 1.4  | <0.001  |
| ICKD                 | INDIA                               | 9.9                  | 1.3  | <0.001  | 8.7                 | 2.0  | <0.001  | 7.1                  | 1.1  | <0.001  | 7.1              | 0.8  | <0.001  |
| KNOW-CKD             | KOREA                               | 14.7                 | 1.4  | <0.001  | 9.9                 | 1.9  | <0.001  | 10.3                 | 1.3  | <0.001  | 9.1              | 2.3  | <0.001  |
| CKD-JAC              | JAPAN                               | 7.7                  | 1.2  | <0.001  | -                   | -    | -       | 5.8                  | 1.0  | <0.001  | 8.0              | 1.2  | <0.001  |
| CKD.QLD              | AUSTRALIA                           | 4.4                  | 1.4  | 0.001   | 5.1                 | 3.0  | 0.08    | 5.8                  | 1.8  | 0.001   | 5.8              | 1.2  | <0.001  |
| CanPREDDICT          | CANADA                              | 3.0                  | 0.9  | 0.001   | 5.0                 | 1.6  | 0.002   | 5.4                  | 1.2  | <0.001  | 4.2              | 0.9  | <0.001  |
| CRIC                 | US                                  | 10.1                 | 0.8  | <0.001  | -                   | -    | -       | -                    | -    | -       | 9.2              | 0.6  | <0.001  |
| CKDopps US           | US                                  | 5.2                  | 1.3  | <0.001  | 6.7                 | 3.5  | 0.06    | 1.0                  | 2.0  | 0.61    | 3.6              | 1.1  | <0.001  |
| CKDopps BR           | BRAZIL                              | 5.1                  | 1.9  | 0.01    | 2.8                 | 3.8  | 0.46    | 3.2                  | 2.9  | 0.26    | 4.3              | 2.0  | 0.03    |
| NRHP                 | URUGUAY                             | 4.5                  | 0.5  | <0.001  | 5.4                 | 1.3  | <0.001  | 1.0                  | 0.9  | 0.25    | 3.1              | 0.5  | <0.001  |
| H3AKDN<br>Enugu      | NIGERIA                             | 4.5                  | 5.9  | 0.45    | -14.1               | 8.3  | 0.09    | -9.3                 | 3.5  | 0.01    | 1.9              | 3.4  | 0.58    |
| CKD-REIN             | FRANCE                              | 4.3                  | 1.0  | <0.001  | 4.0                 | 1.4  | 0.005   | 2.7                  | 1.0  | 0.01    | 3.9              | 0.9  | <0.001  |
| RIISC                | UK                                  | 7.9                  | 2.0  | <0.001  | 8.0                 | 3.0  | 0.01    | 14.6                 | 2.5  | <0.001  | 7.7              | 1.8  | <0.001  |
| CKDBIS               | GERMANY                             | -                    | -    | -       | -                   | -    | -       | -                    | -    | -       | -                | -    | -       |
| EQUAL                | EUROPE VARIOUS                      | 1.8                  | 1.2  | 0.13    | 4.2                 | 2.6  | 0.11    | 1.8                  | 1.7  | 0.30    | 1.4              | 1.2  | 0.26    |
| GCKD                 | GERMANY                             | 4.7                  | 0.9  | <0.001  | 3.2                 | 1.5  | 0.03    | 1.3                  | 1.0  | 0.19    | 1.9              | 0.8  | 0.02    |
| CKDopps GER          | GERMANY                             | 0.8                  | 0.9  | 0.38    | 3.7                 | 2.1  | 0.08    | -0.8                 | 1.4  | 0.57    | 1.0              | 1.0  | 0.33    |
| PSI BIND-NL          | NETHERLANDS                         | -                    | -    | -       | -                   | -    | -       | -                    | -    | -       | -                | -    | -       |
| RRID                 | ENGLAND                             | -                    | -    | -       | -                   | -    | -       | -                    | -    | -       | -                | -    | -       |
| PROVALID             | EUROPE VARIOUS                      | -                    | -    | -       | -                   | -    | -       | -                    | -    | -       | -                | -    | -       |
| <b>Meta-Analysis</b> | <b>Pooled Stats [95%CI]</b>         | 6.2 [ 4.2; 8.1]      |      | < 0.001 | 5.4 [ 3.3; 7.5]     |      | < 0.001 | 4.5 [ 1.7; 7.4]      |      | < 0.001 | 5.8 [ 3.8; 7.7]  |      | < 0.001 |
|                      | <b><math>\tau^2</math> [95% CI]</b> | 11.5 [5.6; 29.6]     |      |         | 13.9 [0.0; 41.2]    |      |         | 26.7 [11.7; 70.9]    |      |         | 12.4 [5.9; 31.1] |      |         |
|                      | <b><math>\tau</math> [95% CI]</b>   | 3.4 [2.4; 5.4]       |      |         | 3.7 [0.0; 6.4]      |      |         | 5.2 [3.4; 8.4]       |      |         | 3.5 [2.4; 5.6]   |      |         |
|                      | <b><math>I^2</math> [95% CI]</b>    | 90.1% [85.6%; 93.2%] |      |         | 37.8% [0.0%; 67.0%] |      |         | 89.5% [84.6%; 92.8%] |      |         |                  |      |         |
|                      | <b>Q test</b>                       | 151.9                | 15   | < 0.001 | 20.9                | 13   | 0.07    | 142.9                | 15   | < 0.001 | 181.8            | 16   | < 0.001 |

Reference = Diabetic kidney disease

Table S15b. Cohort-specific and pooled estimates for the mean difference in hemoglobin according to etiology of CKD using the extended multivariable model for patients with diabetes mellitus in ESA-unexposed subgroup.

| Cohort               | Country                             | HTN                  |      |         | PKD                |      |         | GN                   |      |         | Other                |      |         |
|----------------------|-------------------------------------|----------------------|------|---------|--------------------|------|---------|----------------------|------|---------|----------------------|------|---------|
|                      |                                     | Estimate             | S.E. | p       | Estimate           | S.E. | p       | Estimate             | S.E. | p       | Estimate             | S.E. | p       |
| CORE-CKD             | THAILAND                            | 4.5                  | 2.0  | 0.03    | 7.5                | 3.8  | 0.05    | 7.5                  | 3.2  | 0.02    | 7.8                  | 1.9  | <0.001  |
| C-STRIDE             | CHINA                               | -                    | -    | -       | -                  | -    | -       | 9.7                  | 1.6  | <0.001  | 10.0                 | 1.6  | <0.001  |
| ICKD                 | INDIA                               | 4.9                  | 1.4  | <0.001  | 3.5                | 1.9  | 0.07    | 2.0                  | 1.2  | 0.10    | 2.8                  | 1.0  | 0.005   |
| KNOW-CKD             | KOREA                               | 10.1                 | 1.7  | <0.001  | 5.4                | 2.2  | 0.01    | 9.2                  | 1.8  | <0.001  | 6.9                  | 1.9  | <0.001  |
| CKD-JAC              | JAPAN                               | 7.2                  | 1.2  | <0.001  | -                  | -    | -       | 7.2                  | 1.1  | <0.001  | 8.3                  | 1.2  | <0.001  |
| CKD.QLD              | AUSTRALIA                           | 2.8                  | 1.4  | 0.05    | 0.7                | 2.8  | 0.80    | -0.8                 | 1.8  | 0.66    | 1.9                  | 1.3  | 0.14    |
| CanPREDDICT          | CANADA                              | 1.0                  | 1.1  | 0.36    | 3.2                | 1.7  | 0.07    | 2.7                  | 1.4  | 0.05    | 2.2                  | 1.0  | 0.03    |
| CRIC                 | US                                  | 5.1                  | 0.9  | <0.001  | -                  | -    | -       | -                    | -    | -       | 4.5                  | 0.7  | <0.001  |
| CKDopps US           | US                                  | 3.0                  | 1.3  | 0.02    | 6.3                | 3.3  | 0.06    | 0.4                  | 2.0  | 0.85    | 2.9                  | 1.3  | 0.02    |
| CKDopps BR           | BRAZIL                              | 4.1                  | 2.1  | 0.06    | 7.6                | 3.8  | 0.05    | 4.1                  | 3.1  | 0.17    | 3.8                  | 2.3  | 0.09    |
| NRHP                 | URUGUAY                             | 3.9                  | 0.5  | <0.001  | 5.5                | 1.2  | <0.001  | 0.7                  | 0.8  | 0.42    | 2.3                  | 0.5  | <0.001  |
| H3AKDN<br>Enugu      | NIGERIA                             | -                    | -    | -       | -                  | -    | -       | -                    | -    | -       | -                    | -    | -       |
| CKD-REIN             | FRANCE                              | 2.9                  | 1.0  | 0.003   | 4.5                | 1.5  | 0.002   | 0.9                  | 1.1  | 0.42    | 3.3                  | 0.9  | <0.001  |
| RIISC                | UK                                  | -                    | -    | -       | -                  | -    | -       | -                    | -    | -       | -                    | -    | -       |
| CKDBIS               | GERMANY                             | -                    | -    | -       | -                  | -    | -       | -                    | -    | -       | -                    | -    | -       |
| EQUAL                | EUROPE VARIOUS                      | 2.0                  | 1.4  | 0.14    | 4.5                | 2.8  | 0.11    | 1.1                  | 1.8  | 0.54    | 1.6                  | 1.4  | 0.25    |
| GCKD                 | GERMANY                             | 3.0                  | 0.9  | 0.001   | 3.7                | 1.5  | 0.01    | 0.2                  | 1.0  | 0.82    | 1.7                  | 0.8  | 0.04    |
| CKDopps GER          | GERMANY                             | 1.2                  | 1.0  | 0.27    | 3.4                | 2.1  | 0.11    | -1.6                 | 1.5  | 0.29    | 0.5                  | 1.2  | 0.68    |
| PSI BIND-NL          | NETHERLANDS                         | -                    | -    | -       | -                  | -    | -       | -                    | -    | -       | -                    | -    | -       |
| RRID                 | ENGLAND                             | -                    | -    | -       | -                  | -    | -       | -                    | -    | -       | -                    | -    | -       |
| PROVALID             | EUROPE VARIOUS                      | -                    | -    | -       | -                  | -    | -       | -                    | -    | -       | -                    | -    | -       |
| <b>Meta-Analysis</b> | <b>Pooled Stats [95%CI]</b>         | 3.9 [ 2.5; 5.2]      |      | < 0.001 | 4.4 [3.4; 5.3]     |      | < 0.001 | 2.9 [ 0.7; 5.1]      |      | < 0.001 | 3.8 [ 2.3; 5.4]      |      | < 0.001 |
|                      | <b><math>\tau^2</math> [95% CI]</b> | 4.2 [1.1; 12.9]      |      |         | 1.1 [0.0; 2.6]     |      |         | 11.8 [4.7; 34.3]     |      |         | 6.4 [2.3; 18.2]      |      |         |
|                      | <b><math>\tau</math> [95% CI]</b>   | 2.0 [1.0; 3.6]       |      |         | 1.1 [0.0; 1.6]     |      |         | 3.4 [2.2; 5.9]       |      |         | 2.5 [1.5; 4.3]       |      |         |
|                      | <b><math>I^2</math> [95% CI]</b>    | 68.8% [45.8%; 82.1%] |      |         | 0.0% [0.0%; 58.3%] |      |         | 83.9% [74.3%; 89.9%] |      |         | 78.1% [64.4%; 86.6%] |      |         |
|                      | <b>Q test</b>                       | 41.7                 | 13   | < 0.001 | 5.7                | 11   | 0.90    | 80.5                 | 13   | < 0.001 | 63.9                 | 14   | < 0.001 |

Reference = Diabetic kidney disease

The extended multivariable model included age (continuous), year of study entry, sex, eGFR (per 10 mL increase), sex\*eGFR interaction term, etiology of CKD, diabetes mellitus, coronary artery disease, heart failure, urine ACR (categorical), body mass index (categorical)

Table S15c. Cohort-specific and pooled estimates for the mean difference in hemoglobin according to etiology of CKD using the extended multivariable model for patients without diabetes mellitus in ESA-unexposed subgroup.

| Cohort               | Country                      | HTN                  |      |         | PKD                |      |         | GN                   |      |         | Other                |      |         |
|----------------------|------------------------------|----------------------|------|---------|--------------------|------|---------|----------------------|------|---------|----------------------|------|---------|
|                      |                              | Estimate             | S.E. | p       | Estimate           | S.E. | p       | Estimate             | S.E. | p       | Estimate             | S.E. | p       |
| CORE-CKD             | THAILAND                     | 8.4                  | 1.7  | <0.001  | 11.5               | 3.6  | 0.002   | 11.4                 | 3.0  | <0.001  | 11.7                 | 1.7  | <0.001  |
| C-STRIDE             | CHINA                        | -                    | -    | -       | -                  | -    | -       | 10.5                 | 1.3  | <0.001  | 10.8                 | 1.3  | <0.001  |
| ICKD                 | INDIA                        | 9.6                  | 1.2  | <0.001  | 8.2                | 1.8  | <0.001  | 6.7                  | 1.0  | <0.001  | 7.5                  | 0.8  | <0.001  |
| KNOW-CKD             | KOREA                        | 11.9                 | 1.2  | <0.001  | 7.3                | 1.7  | <0.001  | 11.1                 | 1.2  | <0.001  | 8.7                  | 2.2  | <0.001  |
| CKD-JAC              | JAPAN                        | 7.5                  | 1.0  | <0.001  | -                  | -    | -       | 7.5                  | 0.9  | <0.001  | 8.6                  | 1.1  | <0.001  |
| CKD.QLD              | AUSTRALIA                    | 6.2                  | 1.4  | <0.001  | 4.1                | 2.7  | 0.13    | 2.6                  | 1.7  | 0.13    | 5.3                  | 1.2  | <0.001  |
| CanPREDDICT          | CANADA                       | 4.3                  | 1.0  | <0.001  | 6.5                | 1.6  | <0.001  | 6.0                  | 1.2  | <0.001  | 5.6                  | 0.9  | <0.001  |
| CRIC                 | US                           | 11.7                 | 0.8  | <0.001  | -                  | -    | -       | -                    | -    | -       | 11.1                 | 0.7  | <0.001  |
| CKDopps US           | US                           | 5.7                  | 1.2  | <0.001  | 9.1                | 3.2  | 0.01    | 3.2                  | 1.9  | 0.10    | 5.6                  | 1.3  | <0.001  |
| CKDopps BR           | BRAZIL                       | 3.7                  | 1.8  | 0.03    | 7.2                | 3.5  | 0.04    | 3.8                  | 2.6  | 0.15    | 3.4                  | 1.9  | 0.06    |
| NRHP                 | URUGUAY                      | 5.4                  | 0.4  | <0.001  | 7.0                | 1.1  | <0.001  | 2.2                  | 0.8  | 0.01    | 3.8                  | 0.5  | <0.001  |
| H3AKDN<br>Enugu      | NIGERIA                      | -                    | -    | -       | -                  | -    | -       | -                    | -    | -       | -                    | -    | -       |
| CKD-REIN             | FRANCE                       | 5.2                  | 0.9  | <0.001  | 6.8                | 1.4  | <0.001  | 3.2                  | 1.0  | 0.002   | 5.6                  | 0.9  | <0.001  |
| RIISC                | UK                           | -                    | -    | -       | -                  | -    | -       | -                    | -    | -       | -                    | -    | -       |
| CKDBIS               | GERMANY                      | -                    | -    | -       | -                  | -    | -       | -                    | -    | -       | -                    | -    | -       |
| EQUAL                | EUROPE VARIOUS               | 3.5                  | 1.3  | 0.01    | 6.0                | 2.7  | 0.02    | 2.6                  | 1.8  | 0.14    | 3.1                  | 1.3  | 0.01    |
| GCKD                 | GERMANY                      | 5.5                  | 0.8  | <0.001  | 6.3                | 1.5  | <0.001  | 2.8                  | 1.0  | 0.005   | 4.2                  | 0.8  | <0.001  |
| CKDopps GER          | GERMANY                      | 1.6                  | 0.9  | 0.07    | 3.8                | 2.0  | 0.05    | -1.2                 | 1.3  | 0.39    | 0.9                  | 1.0  | 0.35    |
| PSI BIND-NL          | NETHERLANDS                  | -                    | -    | -       | -                  | -    | -       | -                    | -    | -       | -                    | -    | -       |
| RRID                 | ENGLAND                      | -                    | -    | -       | -                  | -    | -       | -                    | -    | -       | -                    | -    | -       |
| PROVALID             | EUROPE VARIOUS               | -                    | -    | -       | -                  | -    | -       | -                    | -    | -       | -                    | -    | -       |
| <b>Meta-Analysis</b> | <b>Pooled Stats [95%CI]</b>  | 6.5 [ 4.7; 8.2]      |      | < 0.001 | 6.7 [5.7; 7.7]     |      | < 0.001 | 5.1 [ 2.9; 7.3]      |      | < 0.001 | 6.3 [ 4.6; 8.1]      |      | < 0.001 |
|                      | <b>I<sup>2</sup>[95% CI]</b> | 8.2 [3.7; 22.9]      |      |         | 1.4 [0.0; 4.2]     |      |         | 12.1 [5.2; 34.9]     |      |         | 9.0 [4.2; 24.4]      |      |         |
|                      | <b>H<sup>2</sup>[95% CI]</b> | 2.9 [1.9; 4.8]       |      |         | 1.2 [0.0; 2.0]     |      |         | 3.5 [2.3; 5.9]       |      |         | 3.0 [2.0; 4.9]       |      |         |
|                      | <b>I<sup>2</sup>[95% CI]</b> | 89.9% [84.8%; 93.3%] |      |         | 0.0% [0.0%; 58.3%] |      |         | 88.1% [81.7%; 92.2%] |      |         | 91.3% [87.3%; 94.0%] |      |         |
|                      | <b>Q test</b>                | 128.2                | 13   | < 0.001 | 6.5                | 11   | 0.84    | 108.8                | 13   | < 0.001 | 160.0                | 14   | < 0.001 |

Reference = Diabetic kidney disease

The extended multivariable model included age (continuous), year of study entry, sex, eGFR (per 10 mL increase), sex\*eGFR interaction term, etiology of CKD, diabetes mellitus, coronary artery disease, heart failure, urine ACR (categorical), body mass index (categorical)

Table S16. Cohort-specific and pooled estimates for the independent association between covariates and hemoglobin from the extended multivariable model in ESA-unexposed subgroup.

| Cohort               | Country                       | Age (per 10-year increase) |      |         | DM                        |      |         | CVD                   |      |      | CHF                     |      |        |
|----------------------|-------------------------------|----------------------------|------|---------|---------------------------|------|---------|-----------------------|------|------|-------------------------|------|--------|
|                      |                               | Estimate                   | S.E. | p       | Estimate                  | S.E. | p       | Estimate              | S.E. | p    | Estimate                | S.E. | p      |
| CORE-CKD             | THAILAND                      | -0.6                       | 0.7  | 0.37    | -4.0                      | 1.7  | 0.02    | 0.5                   | 1.7  | 0.75 | -8.0                    | 7.0  | 0.25   |
| C-STRIDE             | CHINA                         | -1.1                       | 0.3  | <0.001  | -0.8                      | 1.3  | 0.55    | 1.9                   | 1.3  | 0.15 | 3.0                     | 3.7  | 0.42   |
| ICKD                 | INDIA                         | -1.4                       | 0.3  | <0.001  | -4.7                      | 0.9  | <0.001  | -2.3                  | 1.0  | 0.02 | -1.7                    | 1.3  | 0.18   |
| KNOW-CKD             | KOREA                         | -0.2                       | 0.4  | 0.63    | -1.9                      | 1.5  | 0.22    | 0.1                   | 1.2  | 0.95 | -1.5                    | 3.0  | 0.61   |
| CKD-JAC              | JAPAN                         | -1.4                       | 0.3  | <0.001  | -0.3                      | 0.9  | 0.73    | -0.4                  | 0.8  | 0.56 | -0.1                    | 1.5  | 0.97   |
| CKD.QLD              | AUSTRALIA                     | -1.5                       | 0.3  | <0.001  | -3.4                      | 1.1  | 0.001   | -1.5                  | 1.2  | 0.20 | -1.7                    | 1.7  | 0.32   |
| CanPREDDICT          | CANADA                        | -0.4                       | 0.3  | 0.12    | -3.3                      | 0.9  | <0.001  | 1.2                   | 0.9  | 0.17 | -1.8                    | 1.0  | 0.07   |
| CRIC                 | US                            | 0.1                        | 0.3  | 0.83    | -6.6                      | 0.6  | <0.001  | -1.0                  | 0.5  | 0.08 | -0.4                    | 0.8  | 0.62   |
| CKDopps US           | US                            | 0.0                        | 0.3  | 0.91    | -2.8                      | 0.9  | 0.002   | -2.3                  | 0.9  | 0.01 | -3.8                    | 1.1  | <0.001 |
| CKDopps BR           | BRAZIL                        | 0.4                        | 0.5  | 0.48    | 0.4                       | 1.9  | 0.85    | 0.1                   | 1.7  | 0.93 | -2.7                    | 2.0  | 0.19   |
| NRHP                 | URUGUAY                       | -0.8                       | 0.1  | <0.001  | -1.5                      | 0.3  | <0.001  | -0.5                  | 0.3  | 0.10 | -1.4                    | 0.4  | <0.001 |
| H3AKDN<br>Enugu      | NIGERIA                       | -                          | -    | -       | -                         | -    | -       | -                     | -    | -    | -                       | -    | -      |
| CKD-REIN             | FRANCE                        | -0.3                       | 0.2  | 0.30    | -2.3                      | 0.7  | 0.001   | -1.2                  | 0.6  | 0.06 | -0.9                    | 0.9  | 0.32   |
| RIISC                | UK                            | -                          | -    | -       | -                         | -    | -       | -                     | -    | -    | -                       | -    | -      |
| CKDBIS               | GERMANY                       | -                          | -    | -       | -                         | -    | -       | -                     | -    | -    | -                       | -    | -      |
| EQUAL                | EUROPE VARIOUS                | -2.1                       | 0.6  | <0.001  | -1.5                      | 1.1  | 0.17    | 1.9                   | 1.0  | 0.06 | -0.6                    | 1.1  | 0.58   |
| GCKD                 | GERMANY                       | 0.4                        | 0.3  | 0.17    | -2.5                      | 0.6  | <0.001  | -0.3                  | 0.6  | 0.62 | -0.7                    | 0.7  | 0.33   |
| CKDopps GER          | GERMANY                       | -0.9                       | 0.3  | 0.003   | -0.5                      | 0.9  | 0.63    | -0.4                  | 0.8  | 0.55 | 1.0                     | 1.0  | 0.33   |
| PSI BIND-NL          | NETHERLANDS                   | -                          | -    | -       | -                         | -    | -       | -                     | -    | -    | -                       | -    | -      |
| RRID                 | ENGLAND                       | -                          | -    | -       | -                         | -    | -       | -                     | -    | -    | -                       | -    | -      |
| PROVALID             | EUROPE VARIOUS                | -                          | -    | -       | -                         | -    | -       | -                     | -    | -    | -                       | -    | -      |
|                      | <b>Pooled Stats [95%CI]</b>   | -0.6 [-1.0; -0.2] 0.003    |      |         | -2.5 [-3.5; -1.5] < 0.001 |      |         | -0.4 [-1.1; 0.3] 0.21 |      |      | -1.1 [-1.9; -0.4] 0.007 |      |        |
| <b>Meta-Analysis</b> | <b>r<sup>2</sup> [95% CI]</b> | 0.4 [0.1; 1.2]             |      |         | 2.6 [0.9; 7.4]            |      |         | 1.0 [0.0; 3.1]        |      |      | 1.6 [0.0; 3.2]          |      |        |
|                      | <b>τ [95% CI]</b>             | 0.6 [0.4; 1.1]             |      |         | 1.6 [0.9; 2.7]            |      |         | 1.0 [0.0; 1.8]        |      |      | 1.3 [0.0; 1.8]          |      |        |
|                      | <b>I<sup>2</sup> [95% CI]</b> | 77.6% [63.4%; 86.3%]       |      |         | 83.0% [73.2%; 89.2%]      |      |         | 40.4% [0.0%; 67.7%]   |      |      | 15.7% [0.0%; 53.3%]     |      |        |
|                      | <b>Q test</b>                 | 62.5                       | 14   | < 0.001 | 82.3                      | 14   | < 0.001 | 23.5                  | 14   | 0.05 | 16.6                    | 14   | 0.28   |

Reference: No DM

Reference: No CVD

Reference: No CHF

| Cohort               | Country                       | ACR=A3             |      |      | ACR=A2   |                    |      | BMI<18   |      |                      | BMI=25-29.9 |      |        | BMI≥30              |      |         |                      |  |         |
|----------------------|-------------------------------|--------------------|------|------|----------|--------------------|------|----------|------|----------------------|-------------|------|--------|---------------------|------|---------|----------------------|--|---------|
|                      |                               | Estimate           | S.E. | p    | Estimate | S.E.               | p    | Estimate | S.E. | p                    | Estimate    | S.E. | p      | Estimate            | S.E. | p       |                      |  |         |
| CORE-CKD             | THAILAND                      | -1.5               | 1.7  | 0.37 | 0.7      | 1.8                | 0.69 | -11.8    | 4.3  | 0.01                 | 5.8         | 1.4  | <0.001 | 6.4                 | 1.8  | <0.001  |                      |  |         |
| C-STRIDE             | CHINA                         | 0.9                | 1.3  | 0.51 | 2.5      | 1.3                | 0.07 | -6.9     | 2.7  | 0.01                 | 5.0         | 1.0  | <0.001 | 10.2                | 1.8  | <0.001  |                      |  |         |
| ICKD                 | INDIA                         | -1.1               | 0.8  | 0.16 | 0.7      | 0.7                | 0.33 | -7.5     | 1.2  | <0.001               | 3.2         | 0.7  | <0.001 | 6.7                 | 1.0  | <0.001  |                      |  |         |
| KNOW-CKD             | KOREA                         | -2.6               | 1.6  | 0.10 | 0.0      | 1.6                | 0.99 | -1.7     | 2.8  | 0.55                 | 5.4         | 0.9  | <0.001 | 9.2                 | 1.7  | <0.001  |                      |  |         |
| CKD-JAC              | JAPAN                         | 0.7                | 1.1  | 0.55 | 1.5      | 1.2                | 0.20 | -3.4     | 1.3  | 0.01                 | 5.2         | 0.8  | <0.001 | 10.2                | 1.4  | <0.001  |                      |  |         |
| CKD.QLD              | AUSTRALIA                     | -0.8               | 1.2  | 0.49 | 0.3      | 1.8                | 0.88 | 4.2      | 4.4  | 0.34                 | 2.1         | 1.3  | 0.10   | 3.2                 | 1.2  | 0.01    |                      |  |         |
| CanPREDDICT          | CANADA                        | -1.1               | 0.9  | 0.23 | -0.4     | 0.9                | 0.68 | 8.8      | 5.1  | 0.08                 | 3.9         | 1.8  | 0.03   | 4.5                 | 1.8  | 0.01    |                      |  |         |
| CRIC                 | US                            | -1.2               | 0.7  | 0.11 | -0.1     | 0.7                | 0.92 | -6.4     | 3.5  | 0.07                 | 2.8         | 0.8  | <0.001 | 3.2                 | 0.8  | <0.001  |                      |  |         |
| CKDopps US           | US                            | -1.2               | 1.3  | 0.37 | -2.0     | 1.5                | 0.18 | -3.6     | 3.9  | 0.36                 | 1.8         | 1.3  | 0.18   | 3.9                 | 1.2  | 0.001   |                      |  |         |
| CKDopps BR           | BRAZIL                        | -1.8               | 2.4  | 0.44 | -0.5     | 2.4                | 0.82 | -5.1     | 8.3  | 0.54                 | 4.6         | 2.0  | 0.02   | 6.0                 | 2.1  | 0.005   |                      |  |         |
| NRHP                 | URUGUAY                       | 1.2                | 0.8  | 0.13 | -        | -                  | -    | -4.3     | 1.6  | 0.01                 | 3.1         | 0.4  | <0.001 | 4.9                 | 0.4  | <0.001  |                      |  |         |
| H3AKDN<br>Enugu      | NIGERIA                       | -                  | -    | -    | -        | -                  | -    | -        | -    | -                    | -           | -    | -      | -                   | -    | -       |                      |  |         |
| CKD-REIN             | FRANCE                        | -0.3               | 0.8  | 0.72 | 0.0      | 0.8                | 0.99 | 1.4      | 2.5  | 0.58                 | 3.3         | 0.7  | <0.001 | 3.9                 | 0.8  | <0.001  |                      |  |         |
| RIISC                | UK                            | -                  | -    | -    | -        | -                  | -    | -        | -    | -                    | -           | -    | -      | -                   | -    | -       |                      |  |         |
| CKDBIS               | GERMANY                       | -                  | -    | -    | -        | -                  | -    | -        | -    | -                    | -           | -    | -      | -                   | -    | -       |                      |  |         |
| EQUAL                | EUROPE VARIOUS                | 0.0                | 1.3  | 0.99 | -        | -                  | -    | 1.4      | 4.2  | 0.74                 | 2.1         | 1.1  | 0.06   | 3.4                 | 1.2  | 0.004   |                      |  |         |
| GCKD                 | GERMANY                       | 0.2                | 0.7  | 0.76 | 0.7      | 0.6                | 0.27 | -6.7     | 3.7  | 0.07                 | 3.9         | 0.7  | <0.001 | 4.5                 | 0.7  | <0.001  |                      |  |         |
| CKDopps GER          | GERMANY                       | -0.1               | 1.1  | 0.94 | 0.3      | 1.1                | 0.78 | -3.0     | 3.6  | 0.40                 | 2.3         | 0.9  | 0.01   | 3.3                 | 0.9  | <0.001  |                      |  |         |
| PSI BIND-NL          | NETHERLANDS                   | -                  | -    | -    | -        | -                  | -    | -        | -    | -                    | -           | -    | -      | -                   | -    | -       |                      |  |         |
| RRID                 | ENGLAND                       | -                  | -    | -    | -        | -                  | -    | -        | -    | -                    | -           | -    | -      | -                   | -    | -       |                      |  |         |
| PROVALID             | EUROPE VARIOUS                | -                  | -    | -    | -        | -                  | -    | -        | -    | -                    | -           | -    | -      | -                   | -    | -       |                      |  |         |
| <b>Meta-Analysis</b> | <b>Pooled Stats [95%CI]</b>   | -0.4 [-0.9; 0.1]   |      |      | 0.13     | 0.3 [-0.2; 0.9]    |      |          | 0.20 | -3.4 [-5.9; -0.8]    |             |      | 0.01   | 3.6 [2.9; 4.3]      |      | < 0.001 | 5.3 [4.0; 6.7]       |  | < 0.001 |
|                      | <b>τ<sup>2</sup> [95% CI]</b> | 0.5 [0.0; 1.3]     |      |      |          | 0.4 [0.0; 1.2]     |      |          |      | 15.8 [0.9; 48.6]     |             |      |        | 0.9 [0.0; 3.0]      |      |         | 4.6 [1.4; 13.5]      |  |         |
|                      | <b>τ [95% CI]</b>             | 0.7 [0.0; 1.1]     |      |      |          | 0.6 [0.0; 1.1]     |      |          |      | 3.9 [0.9; 6.9]       |             |      |        | 0.9 [0.0; 1.7]      |      |         | 2.2 [1.2; 3.7]       |  |         |
|                      | <b>I<sup>2</sup> [95% CI]</b> | 0.0% [0.0%; 53.6%] |      |      |          | 0.0% [0.0%; 56.6%] |      |          |      | 53.9% [17.2%; 74.3%] |             |      |        | 39.5% [0.0%; 67.2%] |      |         | 70.8% [50.7%; 82.7%] |  |         |
|                      | <b>Q test</b>                 | 12.7               | 14   | 0.55 | 7.9      | 12                 | 0.79 | 30.3     | 14   | 0.01                 | 23.1        | 14   | 0.06   | 47.9                | 14   | < 0.001 |                      |  |         |

Reference: ACR A1 category

Reference: BMI 18.5-24.9

The extended multivariable model included age (continuous), year of study entry, sex, eGFR (per 10 mL increase), sex\*eGFR interaction term, etiology of CKD, diabetes mellitus, coronary artery disease, heart failure, urine ACR (categorical), body mass index (categorical)

Table S17a. Complete case analysis of the independent association between covariates and hemoglobin from the extended multivariable model (includes 10 cohorts who provided individual-level data).

| Cohort               | Country                             | Age (per 10-year increase) |      |        | DM                   |      |        | CVD                 |      |      | CHF                 |      |      |
|----------------------|-------------------------------------|----------------------------|------|--------|----------------------|------|--------|---------------------|------|------|---------------------|------|------|
|                      |                                     | Estimate                   | S.E. | p      | Estimate             | S.E. | p      | Estimate            | S.E. | p    | Estimate            | S.E. | p    |
| ICKD                 | INDIA                               | -1.23                      | 0.29 | <.0001 | -4.96                | 0.92 | <.0001 | -2.56               | 1.00 | 0.01 | -2.16               | 1.29 | 0.10 |
| CKD-JAC              | JAPAN                               | -1.50                      | 0.31 | <.0001 | -0.42                | 0.89 | 0.64   | -0.90               | 0.80 | 0.26 | -0.57               | 1.50 | 0.70 |
| CKD.QLD              | AUSTRALIA                           | -1.21                      | 0.36 | 0.001  | -2.64                | 1.15 | 0.02   | -1.95               | 1.23 | 0.11 | -0.73               | 1.80 | 0.69 |
| CanPREDDICT          | CANADA                              | -0.73                      | 0.56 | 0.19   | -4.05                | 1.73 | 0.02   | 2.89                | 1.75 | 0.10 | -4.79               | 1.93 | 0.01 |
| CRIC                 | US                                  | 0.03                       | 0.28 | 0.92   | -7.12                | 0.70 | <.0001 | -1.23               | 0.61 | 0.04 | 0.79                | 0.92 | 0.39 |
| CKDopps US           | US                                  | -0.05                      | 0.49 | 0.91   | -2.45                | 1.45 | 0.09   | -3.90               | 1.43 | 0.01 | -1.95               | 1.74 | 0.26 |
| CKDopps BR           | BRAZIL                              | -0.09                      | 0.88 | 0.92   | -0.80                | 3.17 | 0.80   | 1.00                | 2.74 | 0.72 | -1.32               | 2.89 | 0.65 |
| NRHP                 | URUGUAY                             | -0.58                      | 0.13 | <.0001 | -1.52                | 0.33 | <.0001 | -0.15               | 0.32 | 0.63 | -1.10               | 0.48 | 0.02 |
| EQUAL                | EUROPE VARIOUS                      | -2.48                      | 0.90 | 0.01   | 0.22                 | 1.47 | 0.88   | -0.09               | 1.39 | 0.95 | 0.15                | 1.47 | 0.92 |
| CKDopps GER          | GERMANY                             | -0.88                      | 0.42 | 0.04   | -0.44                | 1.30 | 0.74   | -1.16               | 1.03 | 0.26 | 0.14                | 1.35 | 0.92 |
|                      | <b>Pooled Stats [95%CI]</b>         | -0.8 [-1.3; -0.4]          |      | 0.004  | -2.6 [-4.3; -0.8]    |      | 0.009  | -1.0 [-2.2; 0.2]    |      | 0.08 | -0.9 [-1.9; 0.1]    |      | 0.07 |
|                      | <b><math>\tau^2</math> [95% CI]</b> | 0.3 [0.04; 1.5]            |      |        | 4.4 [1.6; 16.0]      |      |        | 2.0 [0.0; 9.2]      |      |      | 1.2 [0.0; 5.6]      |      |      |
| <b>Meta-Analysis</b> | <b><math>\tau</math> [95% CI]</b>   | 0.6 [0.2; 1.2]             |      |        | 2.1 [1.3; 4.1]       |      |        | 1.4 [0.0; 3.0]      |      |      | 1.1 [0.0; 2.4]      |      |      |
|                      | <b><math>I^2</math> [95% CI]</b>    | 65.2% [31.8%; 82.3%]       |      |        | 87.4% [78.9%; 92.5%] |      |        | 50.5% [0.0%; 76.0%] |      |      | 11.0% [0.0%; 51.6%] |      |      |
|                      | <b>Q test</b>                       | 25.89                      | 9    | 0.002  | 71.57                | 9    | <.0001 | 18.18               | 9    | 0.03 | 10.11               | 9    | 0.34 |

Reference: No DM

Reference: No CVD

Reference: No CHF



Table S17a (continued). Complete case analysis of the independent association between covariates and hemoglobin from the extended multivariable model (includes 10 cohorts who provided individual-level data).

| Cohort      | Country                       | ACR = A3            |      |      | ACR = A2           |      |      | BMI = <18.5          |       |        | BMI = 25 - 29.9    |      |        | BMI = ≥30            |      |        |
|-------------|-------------------------------|---------------------|------|------|--------------------|------|------|----------------------|-------|--------|--------------------|------|--------|----------------------|------|--------|
|             |                               | Estimate            | S.E. | p    | Estimate           | S.E. | p    | Estimate             | S.E.  | p      | Estimate           | S.E. | p      | Estimate             | S.E. | p      |
| ICKD        | INDIA                         | -0.87               | 0.77 | 0.26 | 1.12               | 0.75 | 0.14 | -7.64                | 1.22  | <.0001 | 3.31               | 0.69 | <.0001 | 6.65                 | 0.98 | <.0001 |
| CKD-JAC     | JAPAN                         | 1.10                | 1.20 | 0.36 | 1.61               | 1.24 | 0.19 | -5.06                | 1.27  | 0.0001 | 4.82               | 0.77 | <.0001 | 9.45                 | 1.44 | <.0001 |
| CKD.QLD     | AUSTRALIA                     | -0.71               | 1.22 | 0.56 | 0.36               | 1.87 | 0.85 | 4.95                 | 4.27  | 0.25   | 1.71               | 1.35 | 0.21   | 3.06                 | 1.28 | 0.02   |
| CanPREDDICT | CANADA                        | -1.03               | 1.82 | 0.57 | -1.13              | 1.80 | 0.53 | 8.45                 | 4.55  | 0.06   | 3.75               | 1.70 | 0.03   | 2.29                 | 1.64 | 0.16   |
| CRIC        | US                            | -1.09               | 0.74 | 0.14 | 0.12               | 0.70 | 0.86 | -6.14                | 3.30  | 0.06   | 2.72               | 0.87 | 0.002  | 2.94                 | 0.81 | 0.0003 |
| CKDopps US  | US                            | -1.81               | 1.48 | 0.22 | -1.84              | 1.66 | 0.27 | -8.38                | 7.13  | 0.24   | 2.77               | 1.94 | 0.15   | 4.87                 | 1.76 | 0.01   |
| CKDopps BR  | BRAZIL                        | -1.31               | 3.35 | 0.70 | 0.16               | 2.94 | 0.96 | 11.44                | 12.30 | 0.35   | 2.12               | 2.61 | 0.42   | 3.78                 | 2.83 | 0.18   |
| NRHP        | URUGUAY                       | 1.91                | 0.84 | 0.02 | -                  | -    | -    | -3.52                | 1.57  | 0.02   | 3.18               | 0.37 | <.0001 | 5.05                 | 0.38 | <.0001 |
| EQUAL       | EUROPE VARIOUS                | -0.46               | 1.17 | 0.69 | -                  | -    | -    | -6.65                | 4.74  | 0.16   | 3.44               | 1.41 | 0.01   | 2.24                 | 1.52 | 0.14   |
| CKDopps GER | GERMANY                       | -0.89               | 1.16 | 0.44 | -0.05              | 1.10 | 0.96 | -4.34                | 4.61  | 0.35   | 2.41               | 1.20 | 0.04   | 4.05                 | 1.24 | 0.001  |
|             | <b>Pooled Stats [95%CI]</b>   | -0.3 [-1.2; 0.5]    |      | 0.40 | 0.3 [-0.5; 1.1]    |      | 0.42 | -3.0 [-7.2; 1.1]     |       | 0.13   | 3.2 [2.6; 3.8]     |      | <.0001 | 4.5 [ 2.9; 6.1]      |      | 0.0001 |
|             | <b>τ<sup>2</sup> [95% CI]</b> | 0.6 [0.0; 3.0]      |      |      | 0.4 [0.0; 3.0]     |      |      | 26.9 [1.0; 119.8]    |       |        | 0.3 [0.0; 1.3]     |      |        | 3.5 [0.6; 14.6]      |      |        |
|             | <b>τ [95% CI]</b>             | 0.8 [0.0; 1.7]      |      |      | 0.7 [0.0; 1.7]     |      |      | 5.2 [1.0; 10.9]      |       |        | 0.5 [0.0; 1.1]     |      |        | 1.8 [0.8; 3.8]       |      |        |
|             | <b>I<sup>2</sup> [95% CI]</b> | 22.3% [0.0%; 62.1%] |      |      | 0.0% [0.0%; 67.6%] |      |      | 59.1% [17.7%; 79.6%] |       |        | 0.0% [0.0%; 62.4%] |      |        | 66.8% [35.3%; 83.0%] |      |        |
|             | <b>Q test</b>                 | 11.58               | 9    | 0.24 | 4.74               | 7    | 0.69 | 21.98                | 9     | 0.009  | 6.69               | 9    | 0.67   | 27.1                 | 9    | 0.0013 |

Reference: BMI 18.5-24.9

Reference: ACR A1 category

The extended multivariable model included age (continuous), year of study entry, sex, eGFR (per 10 mL increase), sex\*eGFR interaction term, etiology of CKD, diabetes mellitus, coronary artery disease, heart failure, urine ACR (categorical), body mass index (categorical)

Table S17b. Complete case analysis of the mean difference in hemoglobin per 10 mL/min per 1.73m<sup>2</sup> increase in eGFR in men and women (including 10 cohorts who provided individual-level data)

| Cohort      | Country                       | Extended MV Model |                      |       | Extended MV Model |                     |       |      |
|-------------|-------------------------------|-------------------|----------------------|-------|-------------------|---------------------|-------|------|
|             |                               | Men               |                      |       | Women             |                     |       |      |
|             |                               | Estimate          | S.E.                 | p     | Estimate          | S.E.                | p     |      |
| ICKD        | INDIA                         | 3.26              | 0.43                 | <.001 | 2.04              | 0.56                | <.001 |      |
| CKD-JAC     | JAPAN                         | 6.31              | 0.29                 | <.001 | 4.14              | 0.38                | <.001 |      |
| CKD.QLD     | AUSTRALIA                     | 6.64              | 0.47                 | <.001 | 4.30              | 0.53                | <.001 |      |
| CanPREDDICT | CANADA                        | 3.09              | 0.98                 | 0.002 | 3.80              | 1.35                | 0.005 |      |
| CRIC        | US                            | 4.23              | 0.35                 | <.001 | 3.27              | 0.38                | <.001 |      |
| CKDopps US  | US                            | 6.55              | 0.76                 | <.001 | 4.37              | 0.85                | <.001 |      |
| CKDopps BR  | BRAZIL                        | 9.50              | 1.27                 | <.001 | 4.58              | 1.49                | 0.002 |      |
| NRHP        | URUGUAY                       | 5.72              | 0.15                 | <.001 | 3.85              | 0.19                | <.001 |      |
| EQUAL       | EUROPE VARIOUS                | 4.26              | 1.24                 | <.001 | 2.93              | 2.06                | 0.15  |      |
| CKDopps GER | GERMANY                       | 4.87              | 0.62                 | <.001 | 4.12              | 0.81                | <.001 |      |
|             | <b>Pooled Stats [95%CI]</b>   |                   | 5.4 [4.1; 6.7]       | <.001 |                   | 3.7 [3.2; 4.2]      | <.001 |      |
|             | <b>τ<sup>2</sup> [95% CI]</b> |                   | 2.9 [0.9; 11.4]      |       |                   | 0.3 [0.0; 1.4]      |       |      |
|             | <b>τ [95% CI]</b>             |                   | 1.7 [0.9; 3.4]       |       |                   | 0.6 [0.0; 1.2]      |       |      |
|             | <b>I<sup>2</sup> [95% CI]</b> |                   | 88.3% [80.5%; 92.9%] |       |                   | 38.6% [0.0%; 70.7%] |       |      |
|             | <b>Q test</b>                 |                   | 76.74                | 9     | <.001             | 14.67               | 9     | 0.10 |

The extended multivariable model included age (continuous), year of study entry, sex, eGFR (per 10 mL increase), sex\*eGFR interaction term, etiology of CKD, diabetes mellitus, coronary artery disease, heart failure, urine ACR (categorical), body mass index (categorical)

Table S17c. Complete case analysis of the mean difference in hemoglobin in women compared to men at an eGFR value of 15, 30, 45 and 60 mL/min per 1.73m<sup>2</sup> (including 10 cohorts who provided individual-level data)

| Cohort               | Country                       | GFR=15               |      |        | GFR=30               |      |        | GFR=45               |      |        | GFR=60               |       |       |
|----------------------|-------------------------------|----------------------|------|--------|----------------------|------|--------|----------------------|------|--------|----------------------|-------|-------|
|                      |                               | Estimate             | S.E. | p      | Estimate             | S.E. | p      | Estimate             | S.E. | p      | Estimate             | S.E.  | p     |
| ICKD                 | INDIA                         | -10.27               | 1.79 | <.001  | -12.09               | 0.92 | <.001  | -13.92               | 0.80 | <.001  | -15.75               | 1.62  | <.001 |
| CKD-JAC              | JAPAN                         | -6.26                | 1.10 | <.001  | -9.51                | 0.71 | <.001  | -12.77               | 0.89 | <.001  | -16.02               | 1.45  | <.001 |
| CKD.QLD              | AUSTRALIA                     | -2.31                | 1.47 | 0.12   | -5.84                | 0.93 | <.001  | -9.36                | 1.32 | <.001  | -12.88               | 2.19  | <.001 |
| CanPREDDICT          | CANADA                        | -6.88                | 2.26 | 0.002  | -5.81                | 1.49 | <.001  | -4.73                | 3.37 | 0.16   | -3.66                | 5.70  | 0.52  |
| CRIC                 | US                            | -8.20                | 1.34 | <.001  | -9.64                | 0.74 | <.001  | -11.08               | 0.62 | <.001  | -12.53               | 1.15  | <.001 |
| CKDopps US           | US                            | -5.74                | 1.86 | 0.002  | -9.01                | 1.23 | <.001  | -12.29               | 2.26 | <.001  | -15.56               | 3.77  | <.001 |
| CKDopps BR           | BRAZIL                        | -3.69                | 3.19 | 0.25   | -11.07               | 2.29 | <.001  | -18.45               | 4.16 | <.001  | -25.83               | 6.80  | 0.001 |
| NRHP                 | URUGUAY                       | -5.00                | 0.59 | <.001  | -7.81                | 0.33 | <.001  | -10.62               | 0.36 | <.001  | -13.43               | 0.64  | <.001 |
| EQUAL                | EUROPE VARIOUS                | -1.24                | 1.44 | 0.39   | -3.22                | 3.15 | 0.31   | -5.21                | 6.56 | 0.43   | -7.19                | 10.06 | 0.48  |
| CKDopps GER          | GERMANY                       | -5.40                | 1.42 | 0.0001 | -6.52                | 1.03 | <.001  | -7.65                | 2.13 | 0.0003 | -8.77                | 3.53  | 0.01  |
|                      | <b>Pooled Stats [95%CI]</b>   | -5.5 [-7.4; -3.6]    |      | <.001  | -8.3 [-10.0; -6.6]   |      | <.001  | -11.0 [-13.3; -8.7]  |      | <.001  | -13.5 [-16.6; -10.4] |       | <.001 |
|                      | <b>τ<sup>2</sup> [95% CI]</b> | 5.0 [0.8; 21.0]      |      |        | 4.9 [1.2; 20.6]      |      |        | 9.0 [0.7; 41.5]      |      |        | 16.9 [0.0; 81.0]     |       |       |
| <b>Meta-Analysis</b> | <b>τ [95% CI]</b>             | 2.2 [0.9; 4.6]       |      |        | 2.2 [1.1; 4.5]       |      |        | 3.0 [0.8; 6.4]       |      |        | 4.1 [0.0; 9.0]       |       |       |
|                      | <b>I<sup>2</sup> [95% CI]</b> | 65.6% [32.7%; 82.5%] |      |        | 78.9% [61.8%; 88.4%] |      |        | 69.8% [41.9%; 84.2%] |      |        | 37.6% [0.0%; 70.3%]  |       |       |
|                      | <b>Q test</b>                 | 26.2                 | 9    | 0.002  | 42.72                | 9    | <.0001 | 29.75                | 9    | 0.0005 | 14.43                | 9     | 0.11  |
|                      |                               |                      |      |        | Reference: No DM     |      |        | Reference: No CVD    |      |        | Reference: No CHF    |       |       |

The extended multivariable model included age (continuous), year of study entry, sex, eGFR (per 10 mL increase), sex\*eGFR interaction term, etiology of CKD, diabetes mellitus, coronary artery disease, heart failure, urine ACR (categorical), body mass index (categorical)

Table S17d. Complete case analysis of the mean difference in hemoglobin according to etiology of CKD (including 10 cohorts who provided individual-level data).

| Cohort               | Country                             | HTN                 |      |        | PKD                 |      |       | GN                   |      |        | Other               |      |       |
|----------------------|-------------------------------------|---------------------|------|--------|---------------------|------|-------|----------------------|------|--------|---------------------|------|-------|
|                      |                                     | Estimate            | S.E. | p      | Estimate            | S.E. | p     | Estimate             | S.E. | p      | Estimate            | S.E. | p     |
| ICKD                 | INDIA                               | 4.59                | 1.40 | <.001  | 3.35                | 1.95 | 0.09  | 2.30                 | 1.27 | 0.07   | 3.35                | 1.02 | <.001 |
| CKD-JAC              | JAPAN                               | 6.34                | 1.17 | <.001  | -                   | -    | -     | 6.88                 | 1.10 | <.001  | 7.36                | 1.31 | <.001 |
| CKD.QLD              | AUSTRALIA                           | 3.10                | 1.54 | 0.04   | 0.72                | 3.26 | 0.82  | 0.25                 | 2.01 | 0.90   | 3.25                | 1.40 | 0.02  |
| CanPREDDICT          | CANADA                              | 1.65                | 2.08 | 0.43   | 0.15                | 3.31 | 0.96  | 2.86                 | 2.35 | 0.22   | 2.75                | 2.11 | 0.19  |
| CRIC                 | US                                  | 5.30                | 0.98 | <.001  | -                   | -    | -     | -                    | -    | -      | 4.04                | 0.76 | <.001 |
| CKDopps US           | US                                  | 2.32                | 1.97 | 0.24   | 2.42                | 6.61 | 0.71  | 0.56                 | 2.90 | 0.85   | 1.49                | 2.00 | 0.46  |
| CKDopps BR           | BRAZIL                              | 4.69                | 3.63 | 0.20   | 3.31                | 5.57 | 0.55  | 4.93                 | 5.11 | 0.34   | 0.08                | 3.79 | 0.98  |
| NRHP                 | URUGUAY                             | 4.55                | 0.52 | <.001  | 6.69                | 1.26 | <.001 | 1.95                 | 0.87 | 0.03   | 3.27                | 0.55 | <.001 |
| EQUAL                | EUROPE VARIOUS                      | 2.62                | 1.89 | 0.16   | 12.05               | 3.38 | <.001 | 4.17                 | 2.58 | 0.11   | 2.04                | 1.99 | 0.31  |
| CKDopps GER          | GERMANY                             | 2.18                | 1.44 | 0.13   | 7.18                | 3.05 | 0.02  | -0.43                | 1.97 | 0.83   | 0.63                | 1.62 | 0.70  |
| <b>Meta-Analysis</b> | <b>Pooled Stats [95%CI]</b>         | 4.1 [3.0; 5.2]      |      | <.0001 | 4.9 [ 1.7; 8.1]     |      | 0.009 | 2.7 [ 0.8; 4.6]      |      | 0.0122 | 3.3 [ 1.9; 4.6]     |      | <.001 |
|                      | <b><math>\tau^2</math> [95% CI]</b> | 1.2 [0.0; 5.7]      |      |        | 8.6 [0.0; 52.9]     |      |       | 3.4 [0.2; 16.5]      |      |        | 2.3 [0.0; 10.3]     |      |       |
|                      | <b><math>\tau</math> [95% CI]</b>   | 1.1 [0.0; 2.4]      |      |        | 2.9 [0.0; 7.3]      |      |       | 1.8 [0.5; 4.1]       |      |        | 1.5 [0.0; 3.2]      |      |       |
|                      | <b><math>I^2</math> [95% CI]</b>    | 14.3% [0.0%; 55.6%] |      |        | 38.0% [0.0%; 72.6%] |      |       | 60.0% [16.8%; 80.8%] |      |        | 40.2% [0.0%; 71.5%] |      |       |
|                      | <b>Q test</b>                       | 10.5                | 9    | 0.31   | 11.3                | 7    | 0.13  | 20                   | 8    | 0.01   | 15.06               | 9    | 0.09  |

Reference group: diabetic kidney disease

The extended multivariable model included age (continuous), year of study entry, sex, eGFR (per 10 mL increase), sex\*eGFR interaction term, etiology of CKD, diabetes mellitus, coronary artery disease, heart failure, urine ACR (categorical), body mass index (categorical)

Figure S1. Summary of data collection from participating iNET-CKD cohorts for pooled analysis.

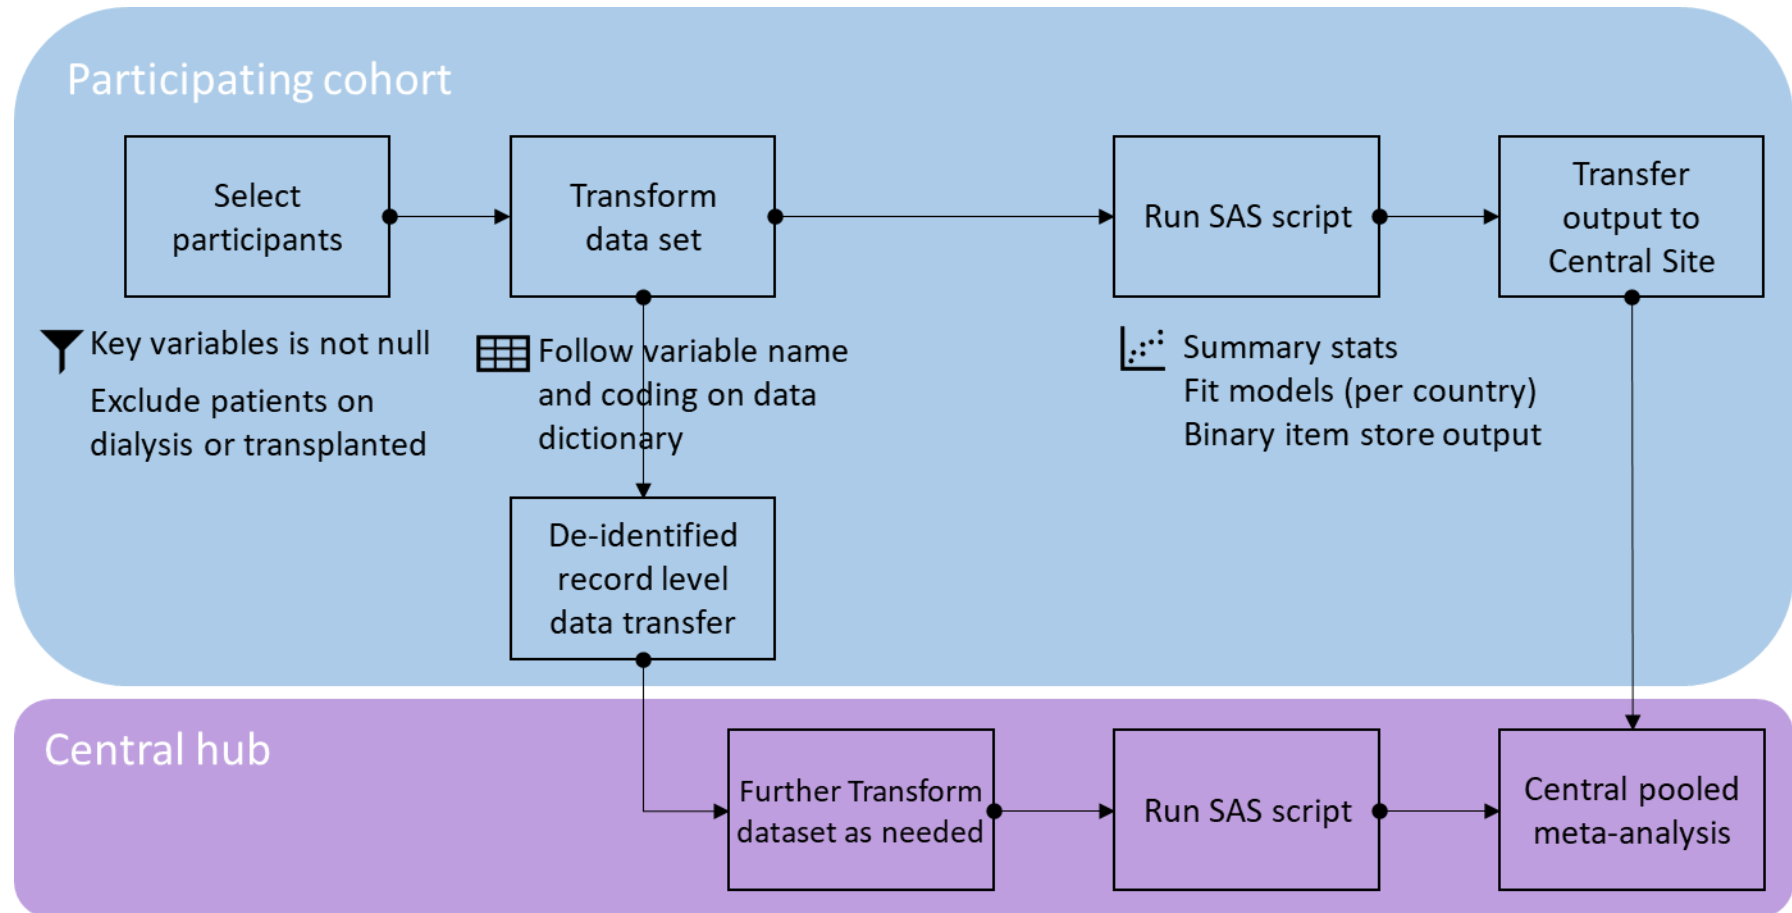

Figure S2. Mean (standard deviation) hemoglobin values in women (red circles) and men (blue circles) within categories of eGFR for each cohort and grouped by continent

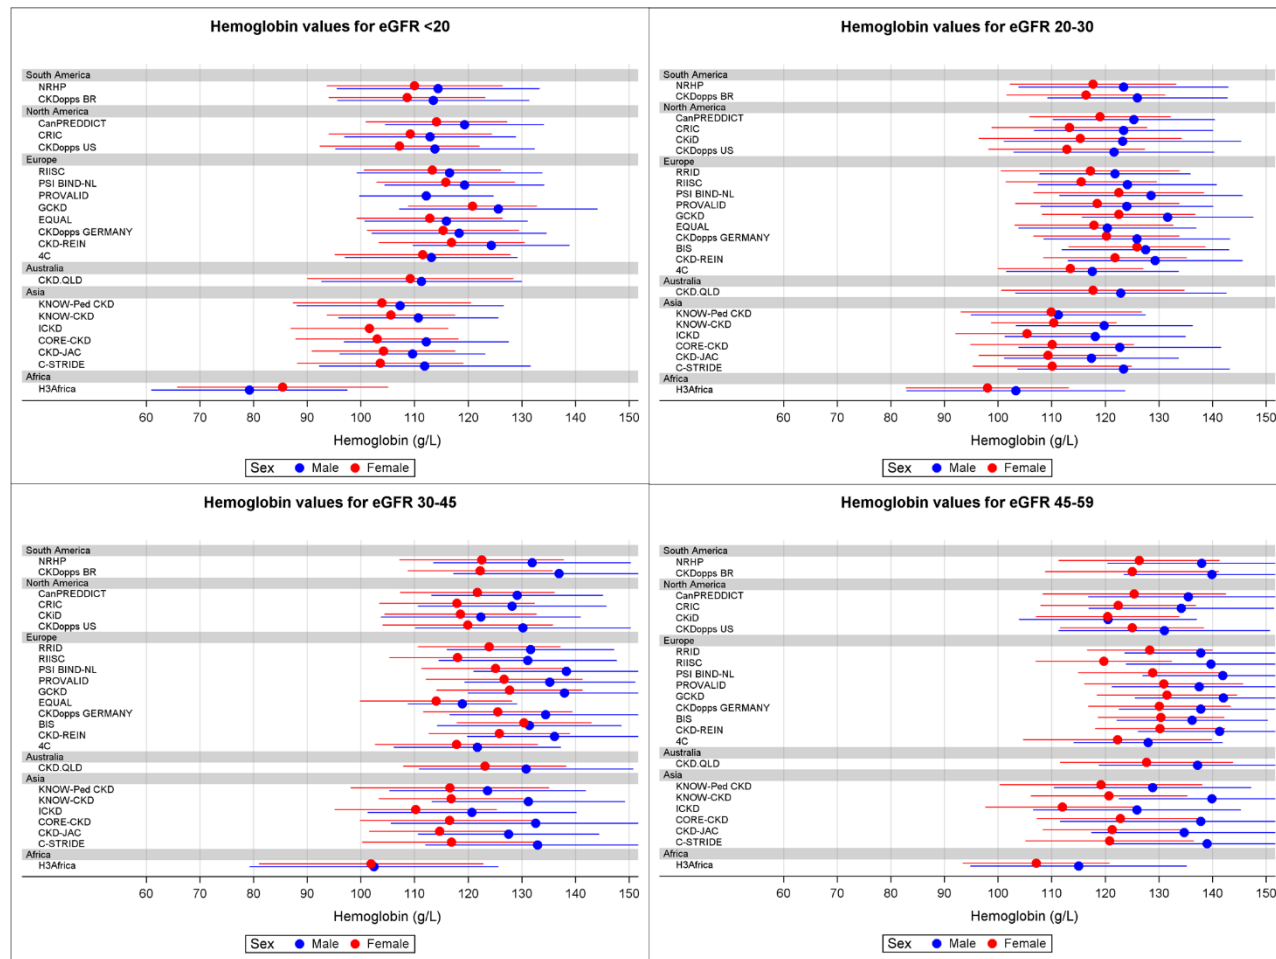

## **Appendix 1. Funding Acknowledgment for iNET-CKD cohorts**

**4C** has been made possible by grants of the KfH Foundation for Preventive Medicine (<http://www.kfh-stiftung-praeventivmedizin.de/>), the Integrated Treatment and Research Center for Organ Transplantation at Hannover, Germany (funded by German Federal Ministry for Education and Research), and local funds at the Coordinating Centers Warsaw, Ankara (Hacettepe University), Istanbul, Izmir (Ege University), and Adana (Cukurova University). **CKDBIS** was supported by the KfH Preventive Medicine Foundation of the non-profit Board of Trustees for Dialysis and Kidney Transplantation, the Association of German Kidney Centers DDnÄ, Bayer, European Nephrology and Dialysis Institute Foundation, Dr. Werner Jackstädt Foundation, The Center of Quality for Nursing and “Frau und Niere” committee of the German Nephrology Association (DGfN). **CanPREDDICT** was funded by an educational grant from Janssen-Ortho Inc. **CKD.QLD** was supported from the National Health and Medical Research Council under the Centre of Research Excellence (APP1079502). **CKD-JAC** is funded by Kyowa-Hakko Kirin Co.Ltd, Tokyo, Japan and by the Japanese Society of Nephrology, Tokyo, Japan. **CKDOPPS** is a DOPPS Program study. The Dialysis Outcomes and Practice Patterns Study (DOPPS) Program is supported by Amgen, Kyowa Hakko Kirin, and Baxter Healthcare. Additional support for specific projects and countries is provided by AstraZeneca, the European Renal Association-European Dialysis and Transplant Association, Fresenius Medical Care Asia-Pacific Ltd, Fresenius Medical Care Canada Ltd, the German Society of Nephrology, Janssen, the Japanese Society for Peritoneal Dialysis, Keryx, Kidney Care UK, MEDICE Arzneimittel Pütter GmbH & Co KG, Proteon, and Vifor Fresenius Medical Care Renal Pharma. Public funding and support is provided for specific DOPPS projects, ancillary studies, or affiliated research projects by: Australia: the National Health and Medical Research Council; Canada: Cancer Care Ontario (CCO) through the Ontario Renal Network (ORN); France: French National Institute of Health and Medical Research (INSERM); Thailand: Thailand Research Foundation (TRF), Chulalongkorn University Matching Fund, King Chulalongkorn Memorial Hospital Matching Fund, and the National Research Council of Thailand (NRCT); the United Kingdom: National Institute for Health Research (NIHR) via the Comprehensive Clinical Research Network (CCRN); and the United States: the National Institutes of Health and the Patient-Centered Outcomes Research Institute. All support is provided without restrictions on publications. **CKD-REIN** is funded by the *Agence Nationale de la Recherche* through the 2010 « *Cohortes-Investissements d’Avenir* » program and by the 2010 national *Programme Hospitalier de Recherche Clinique*. CKD-REIN is also supported through a public-private partnership with Amgen, Fresenius Medical Care, GlaxoSmithKline (GSK), since 2012, Lilly France since 2013, and Otsuka Pharmaceutical since 2015, Baxter and Merck Sharp & Dohme-Chibret (MSD France) from 2012 to 2017, Sanofi-Genzyme from 2012 to 2015, and

Vifor Fresenius, since 2018. Inserm Transfert set up and has managed this partnership since 2011. **CKiD** is funded by the National Institute of Diabetes and Digestive and Kidney Diseases, with additional funding from the National Institute of Neurologic Disorders and Stroke, National Institute of Child Health and Human Development, and the National Heart, Lung, and Blood Institute (U01-DK-66143, U01-DK-66174, and U01-DK-66116). **CORE-CKD** study was supported by National Research Council of Thailand and Health Systems Research Institute and Ramathibodi Hospital. **CRIC** Funding for the CRIC Study was obtained under a cooperative agreement from National Institute of Diabetes and Digestive and Kidney Diseases (U01DK060990, U01DK060984, U01DK061022, U01DK061021, U01DK061028, U01DK060980, U01DK060963, and U01DK060902). In addition, this work was supported in part by: the Perelman School of Medicine at the University of Pennsylvania Clinical and Translational Science Award NIH/NCATS UL1TR000003, Johns Hopkins University UL1 TR-000424, University of Maryland GCRC M01 RR-16500, Clinical and Translational Science Collaborative of Cleveland, UL1TR000439 from the National Center for Advancing Translational Sciences (NCATS) component of the National Institutes of Health and NIH roadmap for Medical Research, Michigan Institute for Clinical and Health Research (MICHR) UL1TR000433, University of Illinois at Chicago CTSA UL1RR029879, Tulane COBRE for Clinical and Translational Research in Cardiometabolic Diseases P20 GM109036, Kaiser Permanente NIH/NCRR UCSF-CTSI UL1 RR-024131. **C-STRIDE** is supported by the grant from National Key Research and Development Program (No. 2016YFC1305405), and a grant by the University of Michigan Health System and Peking University Health Sciences Center Joint Institute for Translational. **EQUAL** has received funding from the European Renal Association–European Dialysis and Transplant Association (ERA–EDTA) and co-funding from the Dutch Kidney Foundation and the Italian Society of Nephrology. **GCKD** is funded by grants from the German Ministry of Education and Research ([www.gesundheitsforschung-bmbf.de](http://www.gesundheitsforschung-bmbf.de); grant numbers 01ER 0804, 01ER 0818, 01ER 0819, 01ER 0820, 01ER 0821 and 01ER 0122) and the KfH Foundation for Preventive Medicine (<http://www.kfh-stiftung-praeventivmedizin.de/>). It is conducted under the auspices of the German Society of Nephrology (<http://www.dgfn.eu>). The current analysis was supported by an intramural grant to S.I.T. and M.M. (ELAN fonds). The work of A.K. was supported through the German Research Foundation (KO 3598/3-1). **H3AKDN** is funded under a cooperative agreement from the National Human Genome Research Institute (1U54-HG006939-01). **iCKD** study is funded by the Department of Biotechnology, Government of India. **KNOW Ped CKD** was funded by grants 2011E3300300, 2012E3301100, 2013E3301600, and 2013E3301602 awarded by Research of Korea Centers for Disease Control and Prevention after peer-review **KNOW-CKD** study was supported by the Research Program funded by the Korea Center for Disease Control and Prevention



(2011E3300300, 2012E3301100, 2013E3301600, 2013E3301601, 2013E3301602, 2016E3300200, 2016E3300201, and 2016E3300202). **NRHP-URU** is funded by the Fondo Nacional de Recursos. **PROVALID** funding was provided in part by the European Union (grant agreement number 241544, Systems Biology towards Novel Chronic Kidney Disease Diagnosis and Treatment) and AbbVie. **PSI BIND-NL** was funded by the Dutch Government (FES-funds), the NFU and the 8 UMCs of The Netherlands. **RIISC** was funded by the University Hospital Birmingham Charities, the JABBS foundation and the British Renal Society. **RRID** was funded by a Research Project Grant (R302/0713) from the Dunhill Medical Trust, a joint British Renal Society and Kidney Research UK fellowship (to NJM) and an unrestricted educational grant from Roche Products Ltd. No pharmaceutical company had any input into study design, data collection or analysis. The data are wholly owned by the investigators.

Appendix 2. STROBE Statement—Checklist of items that should be included in reports of *cohort studies*

|                              | <b>Item<br/>No</b> | <b>Recommendation</b>                                                                                                                                                                                                                                                                                                |
|------------------------------|--------------------|----------------------------------------------------------------------------------------------------------------------------------------------------------------------------------------------------------------------------------------------------------------------------------------------------------------------|
| <b>Title and abstract</b>    | 1                  | <p>(a) Indicate the study’s design with a commonly used term in the title or the abstract<br/> <b>Title and abstract</b></p> <hr/> <p>(b) Provide in the abstract an informative and balanced summary of what was done and what was found<br/> <b>See abstract for details</b></p>                                   |
| <b>Introduction</b>          |                    |                                                                                                                                                                                                                                                                                                                      |
| Background/rationale         | 2                  | <p>Explain the scientific background and rationale for the investigation being reported<br/> <b>Introduction paragraphs 1 and 2</b></p>                                                                                                                                                                              |
| Objectives                   | 3                  | <p>State specific objectives, including any prespecified hypotheses<br/> <b>Introduction paragraph 3</b></p>                                                                                                                                                                                                         |
| <b>Methods</b>               |                    |                                                                                                                                                                                                                                                                                                                      |
| Study design                 | 4                  | <p>Present key elements of study design early in the paper<br/> <b>See “Study Design”</b></p>                                                                                                                                                                                                                        |
| Setting                      | 5                  | <p>Describe the setting, locations, and relevant dates, including periods of recruitment, exposure, follow-up, and data collection<br/> <b>See “Study Design” and Supplementary Material</b></p>                                                                                                                     |
| Participants                 | 6                  | <p>(a) Give the eligibility criteria, and the sources and methods of selection of participants. Describe methods of follow-up<br/> <b>See “Study Design”</b></p> <hr/> <p>(b) For matched studies, give matching criteria and number of exposed and unexposed</p>                                                    |
| Variables                    | 7                  | <p>Clearly define all outcomes, exposures, predictors, potential confounders, and effect modifiers. Give diagnostic criteria, if applicable<br/> <b>See “Variable Definitions” and data dictionary in Supplementary Material</b></p>                                                                                 |
| Data sources/<br>measurement | 8*                 | <p>For each variable of interest, give sources of data and details of methods of assessment (measurement). Describe comparability of assessment methods if there is more than one group<br/> <b>See “Variable Definitions” and data dictionary in Supplementary Material</b></p>                                     |
| Bias                         | 9                  | <p>Describe any efforts to address potential sources of bias<br/> <b>See “Statistical Analysis”</b></p>                                                                                                                                                                                                              |
| Study size                   | 10                 | <p>Explain how the study size was arrived at<br/> <b>See “Study Design” and Supplementary Material</b></p>                                                                                                                                                                                                           |
| Quantitative variables       | 11                 | <p>Explain how quantitative variables were handled in the analyses. If applicable, describe which groupings were chosen and why<br/> <b>See “Variable Definitions” and data dictionary in Supplementary Material</b></p>                                                                                             |
| Statistical methods          | 12                 | <p>(a) Describe all statistical methods, including those used to control for confounding<br/> <b>See “Statistical Analysis”</b></p> <hr/> <p>(b) Describe any methods used to examine subgroups and interactions<br/> <b>See “Statistical Analysis”</b></p> <hr/> <p>(c) Explain how missing data were addressed</p> |

See “Statistical Analysis”

(d) If applicable, explain how loss to follow-up was addressed

n/a

(e) Describe any sensitivity analyses

See “Statistical Analysis”

## Results

|                   |     |                                                                                                                                                                                                                                                                                         |
|-------------------|-----|-----------------------------------------------------------------------------------------------------------------------------------------------------------------------------------------------------------------------------------------------------------------------------------------|
| Participants      | 13* | (a) Report numbers of individuals at each stage of study—eg numbers potentially eligible, examined for eligibility, confirmed eligible, included in the study, completing follow-up, and analysed<br>See “Participant characteristics” and cohort details in the Supplementary Material |
|                   |     | (b) Give reasons for non-participation at each stage<br>n/a                                                                                                                                                                                                                             |
|                   |     | (c) Consider use of a flow diagram                                                                                                                                                                                                                                                      |
| Descriptive data  | 14* | (a) Give characteristics of study participants (eg demographic, clinical, social) and information on exposures and potential confounders<br>See “Participant characteristics”                                                                                                           |
|                   |     | (b) Indicate number of participants with missing data for each variable of interest<br>Table 1 and Table 2                                                                                                                                                                              |
|                   |     | (c) Summarise follow-up time (eg, average and total amount)<br>n/a                                                                                                                                                                                                                      |
| Outcome data      | 15* | Report numbers of outcome events or summary measures over time<br>See “Hemoglobin distribution among cohorts”                                                                                                                                                                           |
| Main results      | 16  | (a) Give unadjusted estimates and, if applicable, confounder-adjusted estimates and their precision (eg, 95% confidence interval). Make clear which confounders were adjusted for and why they were included<br>Figures 2-4 and Supplementary Tables 6-13                               |
|                   |     | (b) Report category boundaries when continuous variables were categorized<br>Tables 1 and 2                                                                                                                                                                                             |
|                   |     | (c) If relevant, consider translating estimates of relative risk into absolute risk for a meaningful time period                                                                                                                                                                        |
| Other analyses    | 17  | Report other analyses done—eg analyses of subgroups and interactions, and sensitivity analyses<br>Sensitivity analysis and Supplementary Tables 5, 14-16                                                                                                                                |
| <b>Discussion</b> |     |                                                                                                                                                                                                                                                                                         |
| Key results       | 18  | Summarise key results with reference to study objectives<br>Paragraph 1 of Discussion                                                                                                                                                                                                   |
| Limitations       | 19  | Discuss limitations of the study, taking into account sources of potential bias or imprecision. Discuss both direction and magnitude of any potential bias<br>Paragraph 2 of Discussion                                                                                                 |
| Interpretation    | 20  | Give a cautious overall interpretation of results considering objectives, limitations, multiplicity of analyses, results from similar studies, and other relevant evidence<br>Paragraphs 3-6 of Discussion                                                                              |
| Generalisability  | 21  | Discuss the generalisability (external validity) of the study results<br>Paragraph 3 of Discussion                                                                                                                                                                                      |

---

**Other information**

---

|         |    |                                                                                                                                                                                                   |
|---------|----|---------------------------------------------------------------------------------------------------------------------------------------------------------------------------------------------------|
| Funding | 22 | Give the source of funding and the role of the funders for the present study and, if applicable, for the original study on which the present article is based<br>See “Role of the funding source” |
|---------|----|---------------------------------------------------------------------------------------------------------------------------------------------------------------------------------------------------|

---

\*Give information separately for exposed and unexposed groups.

**Note:** An Explanation and Elaboration article discusses each checklist item and gives methodological background and published examples of transparent reporting. The STROBE checklist is best used in conjunction with this article (freely available on the Web sites of PLoS Medicine at <http://www.plosmedicine.org/>, Annals of Internal Medicine at <http://www.annals.org/>, and Epidemiology at <http://www.epidem.com/>). Information on the STROBE Initiative is available at <http://www.strobe-statement.org>.
